# Supplementary material for: A cascade indazolone-directed Ir(iii)- and Rh(iii)-catalyzed C(sp2)–H functionalization/[4 + 2] annulation of 1-arylindazolones with sulfoxonium ylides to access chemically divergent 8H-indazolo [1,2-a]cinnolines
Source: Royal Society of Chemistry journal article supplement (doi:10.1039/d2qo00871h), 2022-01-01
Supplement: d2qo00871h1.pdf [file d2qo00871h1.pdf]

# A Cascade Indazolone-directed Ir(III)- and Rh(III)-Catalyzed C(sp<sup>2</sup>)-H Functionalization/[4+2] Annulation of 1-arylidazolones with Sulfoxonium Ylides to Access Chemical Divergent 8*H*-indazolo [1,2-*a*]cinnolines

Yi-Chuan Zheng,<sup>a</sup> Bing Shu,<sup>b</sup> Yao-Fu Zeng,<sup>d</sup> Shao-Yong Chen,<sup>a</sup> Jia-Lin Song,<sup>a</sup>  
Yan-Zhi Liu,<sup>a</sup> Lin Xiao,<sup>a</sup> Xu-Ge Liu,<sup>\*c</sup> Xuanxuan Zhang,<sup>\*a</sup> Shang-Shi Zhang<sup>\*a</sup>

<sup>a</sup>Guangdong Provincial Key Laboratory of Advanced Drug Delivery Systems, Center for Drug Research and Development, Guangdong Pharmaceutical University, Guangzhou, 510006, P. R. China.

<sup>b</sup>School of Pharmacy, Guangdong Pharmaceutical University, Guangzhou, 510006, P. R. China.

<sup>c</sup>School of Pharmacy, Henan University, Kaifeng, Henan 475004, P. R. China.

<sup>d</sup>School of Pharmaceutical Science, Hunan Provincial Key Laboratory of Tumor Microenvironment Responsive Drug Research, Hengyang Medical School, University of South China, Hengyang, Hunan, 421001, P. R. China.

\*Email: [zhangshangshi@gdpu.edu.cn](mailto:zhangshangshi@gdpu.edu.cn)

\*Email: [phil2424123@163.com](mailto:phil2424123@163.com)

\*Email: [liuxg7@henu.edu.cn](mailto:liuxg7@henu.edu.cn)

## Supporting Information

|                                                                                 |     |
|---------------------------------------------------------------------------------|-----|
| 1. General information .....                                                    | 2   |
| 2. Synthesis of 1-phenyl-1,2-dihydro-3 <i>H</i> -indazol-3-one derivatives..... | 3   |
| 3. Synthesis of sulfoxonium ylides .....                                        | 4   |
| 4. General procedure for the product .....                                      | 5   |
| 5. Synthetic application of the product .....                                   | 7   |
| 6. Mechanistic studies.....                                                     | 9   |
| 7. X-Ray crystal data for compound <b>3k</b> .....                              | 13  |
| 8. X-Ray crystal data for compound <b>5a</b> .....                              | 19  |
| 9. Product characterization.....                                                | 26  |
| 10. Copies of product NMR spectra.....                                          | 47  |
| 11. References.....                                                             | 101 |

## 1. General information

Unless otherwise noted, all reactions were carried out at room temperature under an atmosphere of nitrogen with flame-dried glassware. If reaction was not conducted at room temperature, reaction temperatures are reported as the temperature of the bath surrounding the vessel unless otherwise stated. The dry solvents used were purified by distillation over the drying agents indicated in parentheses and were transferred under nitrogen: THF (Na-benzophenone), 1,2-dichloroethane (CaH<sub>2</sub>), dichloromethane (CaH<sub>2</sub>). Anhydrous CF<sub>3</sub>CH<sub>2</sub>OH, CH<sub>3</sub>CN, DMF and MeOH were purchased from Acros Organics and stored under nitrogen atmosphere. Commercially available chemicals were obtained from commercial suppliers and used without further purification unless otherwise stated.

Proton NMR (<sup>1</sup>H) were recorded at 400 MHz, and Carbon NMR (<sup>13</sup>C) at 101 MHz NMR spectrometer unless otherwise stated. The following abbreviations are used for the multiplicities: s: singlet, d: doublet, t: triplet, q: quartet, m: multiplet, br s: broad singlet for proton spectra. Coupling constants (*J*) are reported in Hertz (Hz).

High-resolution mass spectra (HRMS) were recorded on a BRUKER VPEXII spectrometer with EI and ESI mode unless otherwise stated.

Analytical thin layer chromatography was performed on Polygram SIL G/UV254 plates. Visualization was accomplished with short wave UV light, or KMnO<sub>4</sub> staining solutions followed by heating. Flash column chromatography was performed using silica gel (200-300 mesh) with solvents distilled prior to use.

No attempts were made to optimize yields for substrate synthesis.

## 2. Synthesis of 1-phenyl-1,2-dihydro-3*H*-indazol-3-one

### derivatives

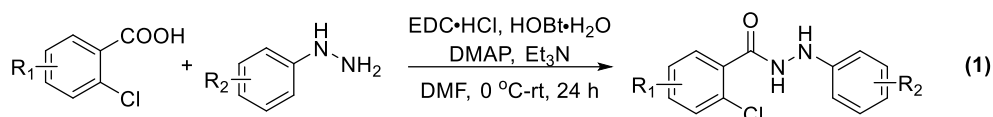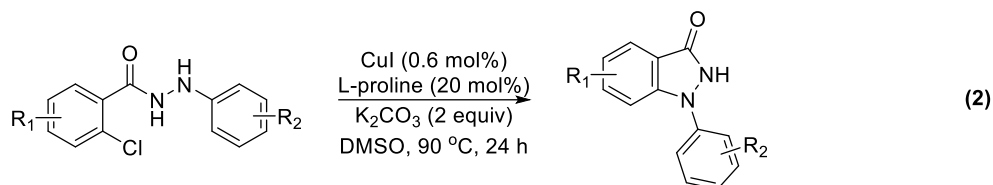

#### Experimental procedure for the synthesis of 2-chloro-*N*-phenylbenzohydrazide derivatives:

According to a previous reference,<sup>[1]</sup> to an oven-dried round bottom flask charged with 2-chlorobenzoic acids (10.0 mmol, 100 mol %) in DMF (20 mL) were added EDC·HCl (2.1 g, 11.0 mmol, 110 mol %), HOBT·H<sub>2</sub>O (1.49 g, 11.0 mmol, 110 mol %), 4-(dimethylamino)pyridine (DMAP, 61.1 mg, 0.5 mmol, 5 mol %), and phenylhydrazines (10.0 mmol, 100 mol %) at 0 °C under N<sub>2</sub> atmosphere. The reaction mixture was allowed to stir for 24 h at room temperature. The reaction mixture was diluted with EtOAc (50 mL) and poured into saturated NH<sub>4</sub>Cl solution. Extractive workup with EtOAc and purification by column chromatography afforded acid hydrazide as a white solid.

#### Experimental procedure for the synthesis of 1-phenyl-1,2-dihydro-3*H*-indazol-3-one derivatives:

According to a previous reference,<sup>[1]</sup> a mixture of 2-chloro-*N*-phenylbenzohydrazides (5.25 mmol), CuI (5 mg, 0.026 mmol, 0.5 mol%), L-proline (120 mg, 1.05 mmol, 20 mol%), and K<sub>2</sub>CO<sub>3</sub> (1.45 g, 10.5 mmol) in DMSO (15 mL) was stirred at 90 °C for 24 h under nitrogen atmosphere. After cooling, the mixture was treated with sat. NaHCO<sub>3</sub> aq. (100 mL) and the mixture was extracted eight times with ethyl acetate (30 mL × 8). The combined organic layer was washed with water (50 mL × 3) and brine (50 mL) and dried over magnesium sulfate. After filtration, solvent was evaporated in vacuo to afford a crude product which was recrystallized to provide pure 1-phenyl-1,2-dihydro-3*H*-indazol-3-one derivatives.

### 3. Synthesis of sulfoxonium ylides

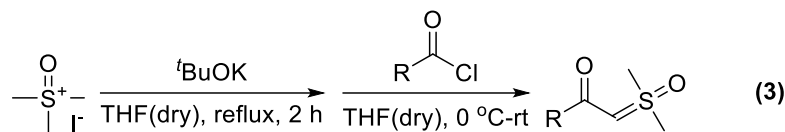

All the sulfoxonium ylides were synthesized according to literature.<sup>[2]</sup> In a 125 mL flame-dried round bottom flask attached to a reflux condenser, under argon atmosphere, 3.0 g of potassium tertbutoxide (27.2 mmol, 4.0 equiv) and 27.0 mL of anhydrous THF were added. Then, 4.48 g of trimethylsulfoxonium iodide (20.4 mmol; 3.0 equiv) was added in one portion. The suspension was heated at reflux for 2 hours. After this time, the mixture was cooled at 0 °C, followed by slow addition of the appropriate benzoyl chloride (6.8 mmol, 1.0 equiv). The reaction mixture temperature was naturally increased to room temperature and this mixture stirred for additional 3 hours. Then, the solvent was removed on a rotary evaporator. After that, 70 mL of water was added and the product extracted with a 3:1 CH<sub>2</sub>Cl<sub>2</sub> : *i*-PrOH mixture (20 mL × 8). The organic phase was washed with water (10 mL × 8), dried over Na<sub>2</sub>SO<sub>4</sub>, and the solvent was removed on a rotary evaporator. The crude material was purified by solubilization in the minimal amount of hot AcOEt (10-15 mL), followed by slow addition of 15 mL of hexanes. The solid was filtered and washed with two portions of a 2:1 mixture of hexanes:AcOEt (2 x 10mL), furnishing the respective sulfoxonium ylides.

## 4. General procedure for the product

### (1) General procedure A

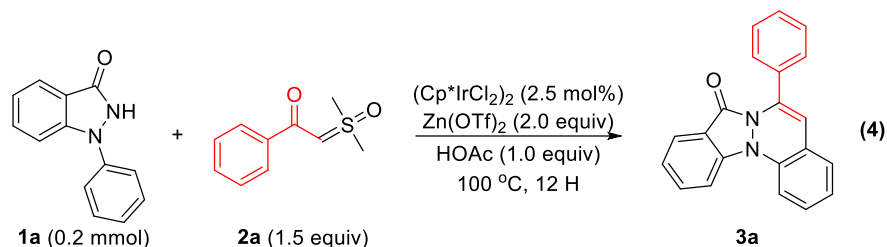

To a Schlenk tube, 1-phenyl-1,2-dihydro-3*H*-indazol-3-one **1a** (42.0 mg, 0.2 mmol), 2-(dimethyl(oxo)- $\lambda^6$ -sulfanylidene)-1-phenylethan-1-one **2a** (58.9 mg, 0.3 mmol, 1.5 equiv),  $[\text{Cp}^*\text{IrCl}_2]_2$  (4.0 mg, 0.005 mmol, 2.5 mmol%), HOAc (12.0 mg, 0.2 mmol, 1.0 equiv) and  $\text{Zn}(\text{OTf})_2$  (145.4 mg, 0.4 mmol, 2.0 equiv) were added. The resulting mixture was stirred at 100 °C (oil bath) for 12 h. The reaction mixture was cooled to room temperature and quenched with saturated sodium chloride. The mixture was diluted with DCM and water. The organic phase was separated and the aqueous layer was extracted with DCM for two times. The combined organic layer was dried over anhydrous  $\text{Na}_2\text{SO}_4$  and concentrated under reduced pressure. After that, the resulting mixture was purified by silica gel chromatography using a mixture of petroleum ether/ethyl acetate as an eluent to get the products **3** and **4**.

### (2) General procedure B

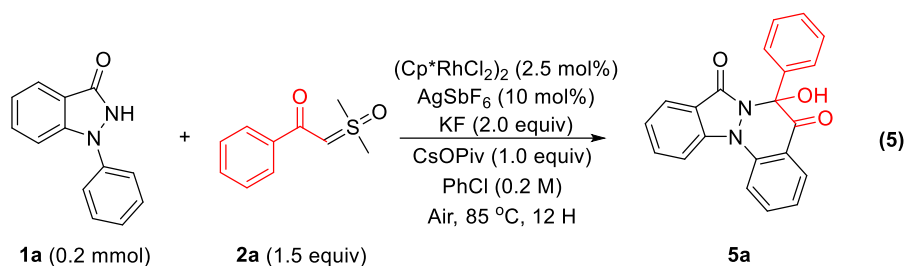

To a Schlenk tube, 1-phenyl-1,2-dihydro-3*H*-indazol-3-one **1a** (42.0 mg, 0.2 mmol), 2-(dimethyl(oxo)- $\lambda^6$ -sulfanylidene)-1-phenylethan-1-one **2a** (58.9 mg, 0.3 mmol, 1.5 equiv),  $[\text{Cp}^*\text{RhCl}_2]_2$  (3.1 mg, 0.005 mmol, 2.5 mmol%),  $\text{AgSbF}_6$  (6.9 mg, 0.02 mmol, 10.0 mmol%), CsOPiv (46.8 mg, 0.2 mmol, 1.0 equiv), KF (23.2 mg, 0.4 mmol, 2.0 equiv) and PhCl (1.0 mL, 0.2 M) were added. The resulting mixture was stirred at 85 °C (oil bath) for 12 h. The reaction mixture was cooled to room temperature and quenched with saturated sodium chloride. The mixture was diluted with DCM and water. The organic phase was separated and the aqueous layer

was extracted with DCM for two times. The combined organic layer was dried over anhydrous  $\text{Na}_2\text{SO}_4$  and concentrated under reduced pressure. After that, the resulting mixture was purified by silica gel chromatography using a mixture of petroleum ether/ethyl acetate as an eluent to get the products **5**.

## 5. Synthetic application of the product

### Gram- Scale Synthesis

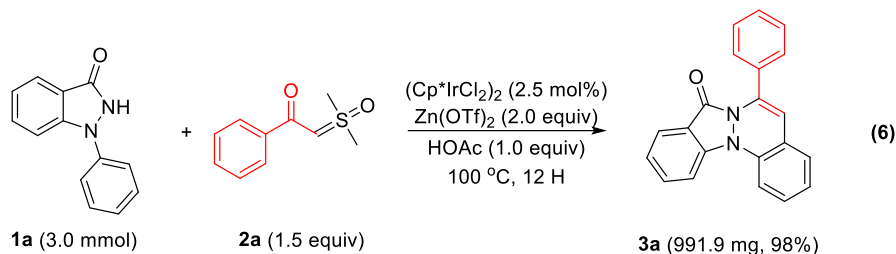

According to the general procedure A, to a Schlenk tube, 1-phenyl-1,2-dihydro-3H-indazol-3-one **1a** (630.7 mg, 3.0 mmol), 2-(dimethyl(oxo)-λ<sup>6</sup>-sulfanylidene)-1-phenylethan-1-one **2a** (883.1 mg, 1.5 equiv), [Cp\*IrCl<sub>2</sub>]<sub>2</sub> (59.8 mg, 2.5 mmol%), HOAc (180.2 mg, 1.0 equiv) and Zn(OTf)<sub>2</sub> (2181.1 mg, 2.0 equiv) were added. The resulting mixture was stirred at 100 °C (oil bath) for 12 h. The reaction mixture was cooled to room temperature and quenched with saturated sodium chloride. The mixture was diluted with DCM and water. The organic phase was separated and the aqueous layer was extracted with DCM for two times. The combined organic layer was dried over anhydrous Na<sub>2</sub>SO<sub>4</sub> and concentrated under reduced pressure. After that, the resulting mixture was purified by silica gel chromatography (petroleum ether/ethyl acetate = 4:1) to get the product **3a** as a yellow solid (991.9 mg, 98% yield).

### The larger-scale Synthesis

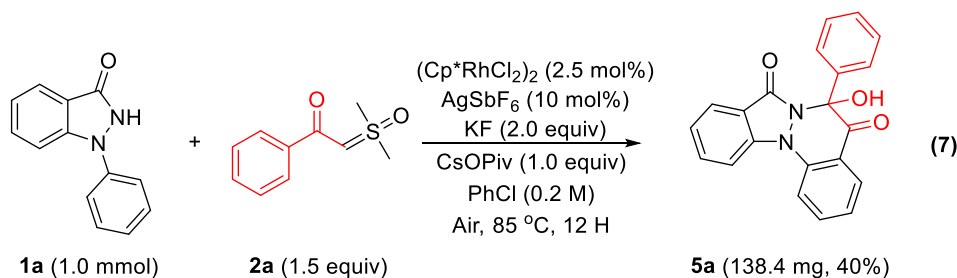

According to the general procedure B, to a Schlenk tube, 1-phenyl-1,2-dihydro-3H-indazol-3-one **1a** (210.2 mg, 1.0 mmol), 2-(dimethyl(oxo)-λ<sup>6</sup>-sulfanylidene)-1-phenylethan-1-one **2a** (294.0 mg, 1.5 equiv), [Cp\*RhCl<sub>2</sub>]<sub>2</sub> (15.3 mg, 2.5 mmol%), AgSbF<sub>6</sub> (34.3 mg, 10.0 mmol%), CsOPiv (234.0 mg, 1.0 equiv), KF (116.2 mg, 2.0 equiv) and PhCl (10.0 mL, 0.2 M) were added. The resulting mixture was stirred at 85 °C (oil bath) for 12 h.

The reaction mixture was cooled to room temperature and quenched with saturated sodium chloride. The mixture was diluted with DCM and water. The organic phase was separated and the aqueous layer was extracted with DCM for two times. The combined organic layer was dried over anhydrous Na<sub>2</sub>SO<sub>4</sub> and concentrated under reduced pressure. After that, the resulting mixture was purified by silica gel chromatography (petroleum ether/ethyl acetate = 2:1) to get the product **5a** as a yellow solid (138.4 mg, 40% yield).



## 6. Mechanistic studies

### (1) Preparation of Rhodium Complex 6

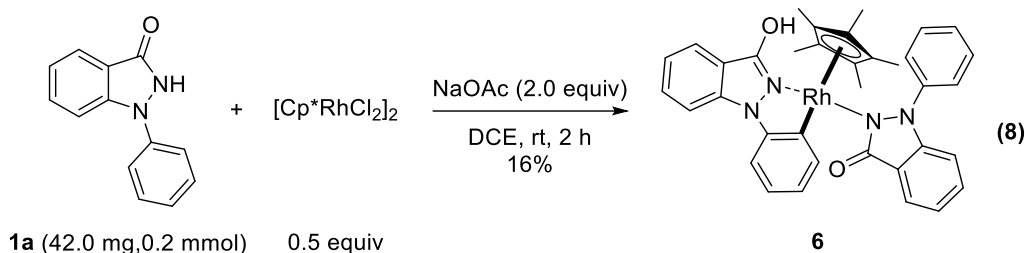

Preparation of **Rhodium complex 6** was carried out according to the reported procedure<sup>[1]</sup>. To an oven-dried sealed tube charged with 1-phenyl-1*H*-indazol-3-ol (**1a**) (42.1 mg, 0.2 mmol, 100 mol %), [RhCp\*Cl<sub>2</sub>]<sub>2</sub> (61.8 mg, 0.1 mmol, 50 mol %), and NaOAc (32.8 mg, 0.4 mmol, 200 mol %) was added DCE (3.5 mL) under air atmosphere at room temperature. The reaction mixture was allowed to stir at room temperature for 2 h. The reaction mixture was diluted with EtOAc (5 mL) and concentrated in vacuo. The residue was purified by flash column chromatography (CH<sub>2</sub>Cl<sub>2</sub>/MeOH = 100:1) to afford a dark brown solid, which was further recrystallized by CH<sub>2</sub>Cl<sub>2</sub>/pentane (1:5) to give **Rhodium complex 6** as a red solid (18 mg, 16%).

### (2) Mechanistic experiments with Rhodium Complex 6

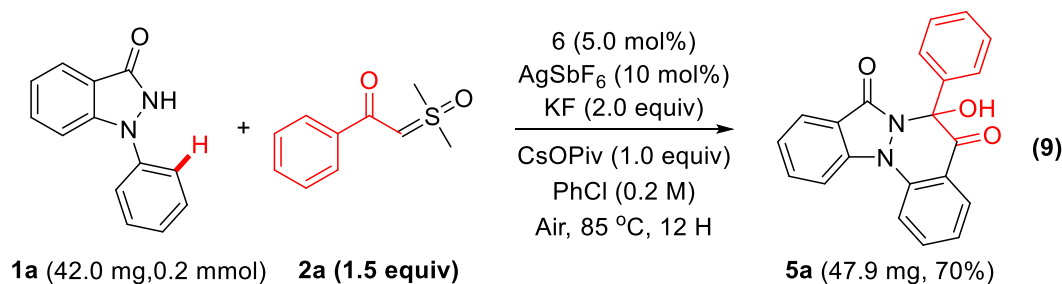

According to the general procedure B, to a Schlenk tube, 1-phenyl-1,2-dihydro-3*H*-indazol-3-one **1a** (42.0 mg, 0.2 mmol), 2-(dimethyl(oxo)-λ<sup>6</sup>-sulfanylidene)-1-phenylethan-1-one **2a** (58.9 mg, 0.3 mmol, 1.5 equiv), **Rhodium complex 6** (6.1 mg, 0.005 mmol, 2.5 mmol%), AgSbF<sub>6</sub> (6.9 mg, 0.02 mmol, 10.0 mmol%), CsOPiv (46.8 mg, 0.2 mmol, 1.0 equiv), KF (23.2 mg, 0.4 mmol, 2.0 equiv) and PhCl (1.0 mL, 0.2 M) were added. The resulting mixture was stirred at 85 °C (oil bath) for 12 h. The reaction mixture was cooled to room temperature and quenched with saturated sodium chloride. The mixture was diluted with DCM and water. The organic phase was separated and the aqueous layer was extracted with DCM for

two times. The combined organic layer was dried over anhydrous  $\text{Na}_2\text{SO}_4$  and concentrated under reduced pressure. After that, the resulting mixture was purified by silica gel chromatography (petroleum ether/ethyl acetate = 2:1) to get the product **5a** as a yellow solid (47.9 mg, 70% yield).

### (3) Control experiment

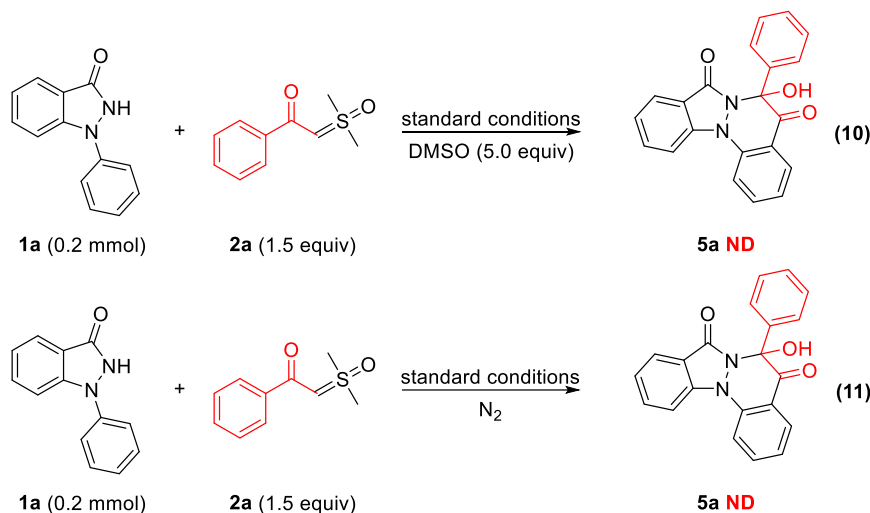

In order to discuss the oxygen source in this oxidizing reaction, we designed two control experiments as follow. According to the general procedure B, to a Schlenk tube, 1-phenyl-1,2-dihydro-3*H*-indazol-3-one **1a** (42.0 mg, 0.2 mmol), 2-(dimethyl(oxo)- $\lambda^6$ -sulfanylidene)-1-phenylethan-1-one **2a** (58.9 mg, 0.3 mmol, 1.5 equiv),  $[\text{Cp}^*\text{RhCl}_2]_2$  (3.1 mg, 0.005 mmol, 2.5 mmol%),  $\text{AgSbF}_6$  (6.9 mg, 0.02 mmol, 10.0 mmol%),  $\text{CsOPiv}$  (46.8 mg, 0.2 mmol, 1.0 equiv),  $\text{KF}$  (23.2 mg, 0.4 mmol, 2.0 equiv),  $\text{DMSO}$  (78.1 mg, 77  $\mu\text{L}$ , 5.0 ) and  $\text{PhCl}$  (1.0 mL, 0.2 M) were added. The resulting mixture was stirred at 85  $^\circ\text{C}$  (oil bath) for 12 h. It was remarkable that we cannot detected the desired product **5a** in the resulting mixture by TLC. (**Formula 9**) Same results also occurred when we using the standard condition according to procedure B, in contrast, under the  $\text{N}_2$  atmosphere. (**Formula 10**) To a Schlenk tube, 1-phenyl-1,2-dihydro-3*H*-indazol-3-one **1a** (42.0 mg, 0.2 mmol), 2-(dimethyl(oxo)- $\lambda^6$ -sulfanylidene)-1-phenylethan-1-one **2a** (58.9 mg, 0.3 mmol, 1.5 equiv),  $[\text{Cp}^*\text{RhCl}_2]_2$  (3.1 mg, 0.005 mmol, 2.5 mmol%),  $\text{AgSbF}_6$  (6.9 mg, 0.02 mmol, 10.0 mmol%),  $\text{CsOPiv}$  (46.8 mg, 0.2 mmol, 1.0 equiv),  $\text{KF}$  (23.2 mg, 0.4 mmol, 2.0 equiv) and  $\text{PhCl}$  (1.0 mL, 0.2 M) were added. The resulting mixture was stirred at 85  $^\circ\text{C}$  (oil bath) under  $\text{N}_2$  atmosphere for 12 h.

### (4) Synthesis of the intermediate V

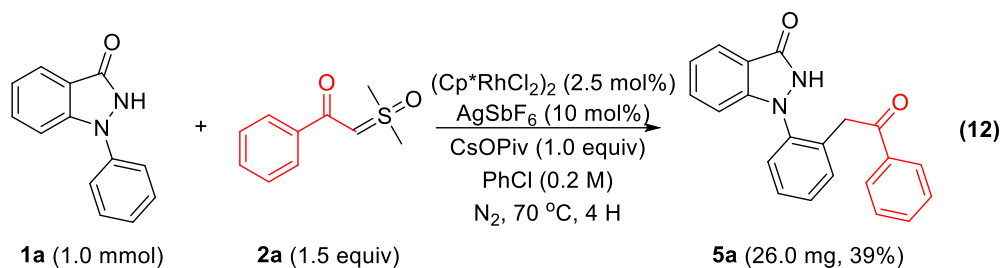

To a Schlenk tube, 1-phenyl-1,2-dihydro-3*H*-indazol-3-one **1a** (42.0 mg, 0.2 mmol), 2-(dimethyl(oxo)- $\lambda^6$ -sulfanylidene)-1-phenylethan-1-one **2a** (58.9 mg, 0.3 mmol, 1.5 equiv), [Cp\**RhCl*<sub>2</sub>]<sub>2</sub> (3.1 mg, 0.005 mmol, 2.5 mmol%), AgSbF<sub>6</sub> (6.9 mg, 0.02 mmol, 10.0 mmol%), CsOPiv (46.8 mg, 0.2 mmol, 1.0 equiv) and PhCl (1.0 mL, 0.2 M) were added. The resulting mixture was stirred at 70 °C (oil bath) for 4 h under the N<sub>2</sub> atmosphere. The reaction mixture was cooled to room temperature and quenched with saturated sodium chloride. The mixture was diluted with DCM and water. The organic phase was separated and the aqueous layer was extracted with DCM for two times. The combined organic layer was dried over anhydrous Na<sub>2</sub>SO<sub>4</sub> and concentrated under reduced pressure. After that, the resulting mixture was purified by silica gel chromatography using a mixture of petroleum ether/ethyl acetate (4:1) as an eluent to get the products **7** as a yellow solid (26.0 mg, 39% yield).

#### 1-(2-(2-oxo-2-phenylethyl)phenyl)-1,2-dihydro-3*H*-indazol-3-one (**7**)

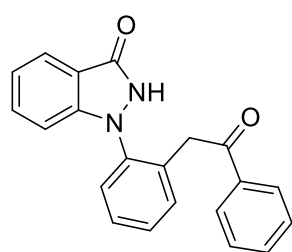

<sup>1</sup>H NMR (400 MHz, DMSO)  $\delta$  7.63 (d, *J* = 7.4 Hz, 2H), 7.56 (d, *J* = 8.0 Hz, 1H), 7.49 – 7.43 (m, 2H), 7.38 – 7.36 (m, 1H), 7.34 (s, 1H), 7.32 (d, *J* = 2.3 Hz, 1H), 7.28 (d, *J* = 3.6 Hz, 1H), 7.23 (d, *J* = 7.8 Hz, 1H), 7.16 – 7.12 (m, 1H), 7.04 (d, *J* = 8.4 Hz, 1H), 6.96 (t, *J* = 7.6 Hz, 1H), 4.37 (s, 2H). <sup>13</sup>C NMR (101 MHz, DMSO)  $\delta$  196.8, 138.4, 136.5, 133.0, 132.7,

132.5, 128.7, 128.6, 128.1, 127.9, 127.8, 127.6, 126.4, 120.7, 120.2, 119.7, 109.8, 41.4. **HRMS (ESI)** *m/z* calcd. for C<sub>21</sub>H<sub>16</sub>N<sub>2</sub>O<sub>2</sub>Na<sup>+</sup> [M+Na]<sup>+</sup> : 351.1109, found: 351.1112.

#### (5) Mechanistic experiments with Intermediate **V**

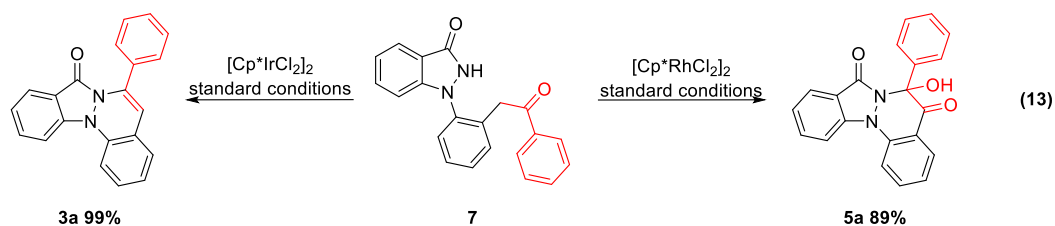

According to the general procedure A, to a Schlenk tube, 1-(2-(2-oxo-2-phenylethyl)phenyl)-1,2-dihydro-3*H*-indazol-3-one **7** (32.8 mg, 0.1 mmol), [Cp\*IrCl<sub>2</sub>]<sub>2</sub> (2.0 mg, 2.5 mmol%), HOAc (6.0 mg, 1.0 equiv) and Zn(OTf)<sub>2</sub> (72.7 mg, 2.0 equiv) were added. The resulting mixture was stirred at 100 °C (oil bath) for 12 h. The reaction mixture was cooled to room temperature and quenched with saturated sodium chloride. The mixture was diluted with DCM and water. The organic phase was separated and the aqueous layer was extracted with DCM for two times. The combined organic layer was dried over anhydrous Na<sub>2</sub>SO<sub>4</sub> and concentrated under reduced pressure. After that, the resulting mixture was purified by silica gel chromatography (petroleum ether/ethyl acetate = 4:1) to get the product **3a** as a yellow solid (30.7 mg, 99% yield).

According to the general procedure B, to a Schlenk tube, 1-(2-(2-oxo-2-phenylethyl)phenyl)-1,2-dihydro-3*H*-indazol-3-one **7** (32.8 mg, 0.1 mmol), [Cp\*RhCl<sub>2</sub>]<sub>2</sub> (1.5 mg, 2.5 mmol%), AgSbF<sub>6</sub> (3.4 mg, 10.0 mmol%), CsOPiv (23.4 mg, 1.0 equiv), KF (11.6 mg, 2.0 equiv) and PhCl (0.5 mL, 0.2 M) were added. The resulting mixture was stirred at 85 °C (oil bath) for 12 h. The reaction mixture was cooled to room temperature and quenched with saturated sodium chloride. The mixture was diluted with DCM and water. The organic phase was separated and the aqueous layer was extracted with DCM for two times. The combined organic layer was dried over anhydrous Na<sub>2</sub>SO<sub>4</sub> and concentrated under reduced pressure. After that, the resulting mixture was purified by silica gel chromatography (petroleum ether/ethyl acetate = 2:1) to get the product **5a** as a yellow solid (30.4 mg, 89% yield).

## 7. X-Ray crystal data for compound **3k**

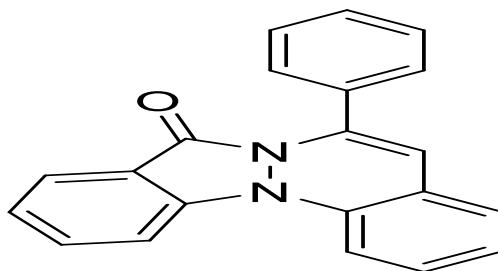

X-ray-quality crystal was obtained by slow diffusion of Petroleum ether into a dilute dichloromethane solution of **3k** at room temperature under air. Thermal ellipsoids drawn at the 50 % probability level. Crystal data were obtained on a SuperNova, Dual, Cu at zero, AtlasS2 diffractometer using Mo K $\alpha$  radiation ( $\lambda = 0.71073 \text{ \AA}$ ). The crystal was kept at 199.99(10) K during data collection.

**Table 1 Crystal data and structure refinement for **3k**(d-243).**

|                                                |                                                                      |
|------------------------------------------------|----------------------------------------------------------------------|
| Identification code                            | d-243                                                                |
| Empirical formula                              | C <sub>21</sub> H <sub>13</sub> ClN <sub>2</sub> O                   |
| Formula weight                                 | 344.78                                                               |
| Temperature/K                                  | 199.99(10)                                                           |
| Crystal system                                 | monoclinic                                                           |
| Space group                                    | P2 <sub>1</sub> /c                                                   |
| a/ $\text{\AA}$                                | 12.5768(6)                                                           |
| b/ $\text{\AA}$                                | 8.3055(3)                                                            |
| c/ $\text{\AA}$                                | 15.5210(7)                                                           |
| $\alpha$ / $^\circ$                            | 90                                                                   |
| $\beta$ / $^\circ$                             | 94.117(4)                                                            |
| $\gamma$ / $^\circ$                            | 90                                                                   |
| Volume/ $\text{\AA}^3$                         | 1617.09(12)                                                          |
| Z                                              | 4                                                                    |
| $\rho_{\text{calc}}/\text{cm}^3$               | 1.416                                                                |
| $\mu/\text{mm}^{-1}$                           | 0.247                                                                |
| F(000)                                         | 712.0                                                                |
| Crystal size/ $\text{mm}^3$                    | 0.15 $\times$ 0.13 $\times$ 0.12                                     |
| Radiation                                      | Mo K $\alpha$ ( $\lambda = 0.71073$ )                                |
| 2 $\theta$ range for data collection/ $^\circ$ | 5.262 to 49.986                                                      |
| Index ranges                                   | -13 $\leq$ h $\leq$ 14, -8 $\leq$ k $\leq$ 9, -18 $\leq$ l $\leq$ 15 |
| Reflections collected                          | 7003                                                                 |
| Independent reflections                        | 2838 [ $R_{\text{int}} = 0.0186$ , $R_{\text{sigma}} = 0.0252$ ]     |
| Data/restraints/parameters                     | 2838/0/226                                                           |

|                                                |                                  |
|------------------------------------------------|----------------------------------|
| Goodness-of-fit on $F^2$                       | 1.042                            |
| Final R indexes [ $I > 2\sigma(I)$ ]           | $R_1 = 0.0363$ , $wR_2 = 0.0956$ |
| Final R indexes [all data]                     | $R_1 = 0.0422$ , $wR_2 = 0.1004$ |
| Largest diff. peak/hole / $e \text{ \AA}^{-3}$ | 0.58/-0.30                       |

### Crystal structure determination of 3k

**Crystal Data** for  $C_{21}H_{13}ClN_2O$  ( $M = 344.78$  g/mol): monoclinic, space group  $P2_1/c$  (no. 14),  $a = 12.5768(6)$   $\text{\AA}$ ,  $b = 8.3055(3)$   $\text{\AA}$ ,  $c = 15.5210(7)$   $\text{\AA}$ ,  $\beta = 94.117(4)^\circ$ ,  $V = 1617.09(12)$   $\text{\AA}^3$ ,  $Z = 4$ ,  $T = 199.99(10)$  K,  $\mu(\text{Mo K}\alpha) = 0.247$   $\text{mm}^{-1}$ ,  $D_{\text{calc}} = 1.416$   $\text{g/cm}^3$ , 7003 reflections measured ( $5.262^\circ \leq 2\theta \leq 49.986^\circ$ ), 2838 unique ( $R_{\text{int}} = 0.0186$ ,  $R_{\text{sigma}} = 0.0252$ ) which were used in all calculations. The final  $R_1$  was 0.0363 ( $I > 2\sigma(I)$ ) and  $wR_2$  was 0.1004 (all data).

**Table 2 Fractional Atomic Coordinates ( $\times 10^4$ ) and Equivalent Isotropic Displacement Parameters ( $\text{\AA}^2 \times 10^3$ ) for 3k.  $U_{\text{eq}}$  is defined as 1/3 of the trace of the orthogonalised  $U_{ij}$  tensor.**

| Atom | x          | y          | z          | U(eq)     |
|------|------------|------------|------------|-----------|
| Cl1  | 426.1(4)   | 6392.7(6)  | 4383.1(3)  | 31.66(16) |
| O1   | 1952.2(11) | 3713.6(16) | 3225.8(8)  | 30.7(3)   |
| N1   | 3004.0(12) | 4664.6(18) | 5306.1(9)  | 25.3(4)   |
| N2   | 2764.2(12) | 5016.9(18) | 4416.6(9)  | 23.7(3)   |
| C1   | 3894.9(15) | 5481(2)    | 5706.1(11) | 25.5(4)   |
| C2   | 4510.6(15) | 4851(3)    | 6402.3(12) | 31.6(5)   |
| C3   | 5295.5(16) | 5804(3)    | 6823.8(13) | 38.5(5)   |
| C4   | 5467.7(16) | 7356(3)    | 6557.1(14) | 39.5(5)   |
| C5   | 4869.8(16) | 7967(3)    | 5848.5(14) | 36.4(5)   |
| C6   | 4084.4(14) | 7044(2)    | 5404.2(12) | 27.8(4)   |
| C7   | 3438.0(15) | 7630(2)    | 4656.8(12) | 29.4(4)   |
| C8   | 2800.1(14) | 6650(2)    | 4176.7(12) | 24.8(4)   |
| C9   | 2078.2(15) | 7180(2)    | 3434.7(12) | 24.7(4)   |
| C10  | 974.1(14)  | 7095(2)    | 3457.4(11) | 24.9(4)   |
| C11  | 290.6(16)  | 7597(2)    | 2775.0(13) | 32.6(5)   |
| C12  | 715.2(18)  | 8222(3)    | 2050.5(13) | 39.0(5)   |
| C13  | 1801.7(18) | 8360(3)    | 2016.1(14) | 41.0(5)   |
| C14  | 2480.3(16) | 7842(2)    | 2702.5(13) | 33.4(5)   |
| C15  | 2246.5(14) | 3729(2)    | 3995.3(12) | 23.9(4)   |
| C16  | 2141.8(14) | 2532(2)    | 4663.6(11) | 24.2(4)   |
| C17  | 2614.7(14) | 3126(2)    | 5440.8(11) | 23.9(4)   |
| C18  | 2564.0(16) | 2258(2)    | 6207.4(12) | 30.9(4)   |
| C19  | 2037.5(17) | 800(2)     | 6161.0(13) | 35.8(5)   |

**Table 2 Fractional Atomic Coordinates ( $\times 10^4$ ) and Equivalent Isotropic Displacement Parameters ( $\text{\AA}^2 \times 10^3$ ) for 3k.  $U_{\text{eq}}$  is defined as 1/3 of the trace of the orthogonalised  $U_{\text{IJ}}$  tensor.**

| Atom | x          | y       | z          | $U(\text{eq})$ |
|------|------------|---------|------------|----------------|
| C20  | 1565.1(18) | 203(2)  | 5385.5(13) | 36.6(5)        |
| C21  | 1605.9(16) | 1062(2) | 4632.2(13) | 30.8(4)        |

**Table 3 Anisotropic Displacement Parameters ( $\text{\AA}^2 \times 10^3$ ) for 3k. The Anisotropic displacement factor exponent takes the form:  $-2\pi^2[h^2a^2U_{11}+2hka*b*U_{12}+\dots]$ .**

| Atom | $U_{11}$ | $U_{22}$ | $U_{33}$ | $U_{23}$  | $U_{13}$ | $U_{12}$ |
|------|----------|----------|----------|-----------|----------|----------|
| Cl1  | 30.4(3)  | 37.8(3)  | 27.7(3)  | 1.3(2)    | 8.21(19) | -4.0(2)  |
| O1   | 35.6(8)  | 35.6(8)  | 19.9(7)  | -1.9(6)   | -6.0(6)  | -0.9(6)  |
| N1   | 29.0(9)  | 28.4(8)  | 17.6(7)  | 0.1(6)    | -3.9(6)  | -1.4(7)  |
| N2   | 26.1(8)  | 26.6(8)  | 17.7(7)  | 1.0(6)    | -3.0(6)  | -0.6(6)  |
| C1   | 21.4(9)  | 34.4(10) | 20.7(9)  | -6.7(8)   | 1.5(7)   | 2.0(8)   |
| C2   | 28.3(11) | 40.5(11) | 25.6(10) | -2.8(9)   | -0.7(8)  | 5.4(9)   |
| C3   | 26.3(11) | 60.0(14) | 28.3(11) | -4.7(10)  | -5.3(8)  | 6.1(10)  |
| C4   | 25.5(11) | 56.3(14) | 35.7(11) | -13.0(10) | -3.4(9)  | -6.9(10) |
| C5   | 29.2(11) | 40.4(12) | 39.3(12) | -6.1(10)  | 0.2(9)   | -7.0(9)  |
| C6   | 20.8(10) | 33.0(10) | 29.5(10) | -4.7(9)   | 1.6(8)   | -0.2(8)  |
| C7   | 25.8(10) | 27.0(10) | 35.2(11) | 1.7(8)    | 1.4(8)   | -2.7(8)  |
| C8   | 22.4(9)  | 26.3(9)  | 26.1(10) | 1.4(8)    | 3.7(7)   | -0.1(7)  |
| C9   | 25.9(10) | 21.8(9)  | 26.3(9)  | 1.6(8)    | 0.5(7)   | 0.4(7)   |
| C10  | 26.6(10) | 23.5(9)  | 24.8(9)  | 1.2(8)    | 3.2(7)   | 0.5(8)   |
| C11  | 25.0(10) | 35.1(11) | 37.1(11) | 2.5(9)    | -2.2(8)  | 4.5(8)   |
| C12  | 41.6(13) | 41.7(12) | 32.7(11) | 13.5(10)  | -4.3(9)  | 7.4(10)  |
| C13  | 43.8(13) | 45.0(12) | 34.8(12) | 18.7(10)  | 8.1(10)  | 1.3(10)  |
| C14  | 28.1(11) | 35.6(11) | 37.1(11) | 9.3(9)    | 5.2(9)   | -2.1(9)  |
| C15  | 19.8(9)  | 26.4(9)  | 25.3(10) | -4.5(8)   | 0.3(7)   | 2.7(7)   |
| C16  | 24.0(10) | 25.1(9)  | 23.4(9)  | -2.5(8)   | 1.0(7)   | 4.6(7)   |
| C17  | 24.3(9)  | 24.8(9)  | 22.5(9)  | -2.1(8)   | 1.4(7)   | 4.1(7)   |
| C18  | 37.6(11) | 31.8(10) | 23.1(10) | 0.0(8)    | 0.7(8)   | 3.0(9)   |
| C19  | 46.6(13) | 30.4(11) | 31.1(11) | 6.4(9)    | 6.9(9)   | 3.7(9)   |
| C20  | 46.3(13) | 23.0(10) | 41.0(12) | -1.2(9)   | 7.4(10)  | -2.9(9)  |
| C21  | 35.7(11) | 27.5(10) | 29.1(10) | -6.6(8)   | 1.8(8)   | 1.4(8)   |

**Table 4 Bond Lengths for 3k.**

| Atom | Atom | Length/ $\text{\AA}$ | Atom | Atom | Length/ $\text{\AA}$ |
|------|------|----------------------|------|------|----------------------|
| Cl1  | C10  | 1.7384(18)           | C8   | C9   | 1.481(2)             |
| O1   | C15  | 1.225(2)             | C9   | C10  | 1.393(3)             |
| N1   | N2   | 1.4224(19)           | C9   | C14  | 1.390(3)             |
| N1   | C1   | 1.414(2)             | C10  | C11  | 1.380(3)             |

**Table 4 Bond Lengths for 3k.**

| Atom Atom Length/Å |     |          | Atom Atom Length/Å |     |          |
|--------------------|-----|----------|--------------------|-----|----------|
| N1                 | C17 | 1.390(2) | C11                | C12 | 1.380(3) |
| N2                 | C8  | 1.408(2) | C12                | C13 | 1.376(3) |
| N2                 | C15 | 1.391(2) | C13                | C14 | 1.385(3) |
| C1                 | C2  | 1.386(3) | C15                | C16 | 1.450(3) |
| C1                 | C6  | 1.406(3) | C16                | C17 | 1.396(2) |
| C2                 | C3  | 1.392(3) | C16                | C21 | 1.394(3) |
| C3                 | C4  | 1.376(3) | C17                | C18 | 1.397(3) |
| C4                 | C5  | 1.383(3) | C18                | C19 | 1.379(3) |
| C5                 | C6  | 1.393(3) | C19                | C20 | 1.395(3) |
| C6                 | C7  | 1.452(3) | C20                | C21 | 1.374(3) |
| C7                 | C8  | 1.332(3) |                    |     |          |

**Table 5 Bond Angles for 3k.**

| Atom Atom Atom Angle/° |    |    |            | Atom Atom Atom Angle/° |     |     |            |
|------------------------|----|----|------------|------------------------|-----|-----|------------|
| C1                     | N1 | N2 | 115.69(14) | C14                    | C9  | C10 | 117.55(17) |
| C17                    | N1 | N2 | 106.42(13) | C9                     | C10 | C11 | 119.54(14) |
| C17                    | N1 | C1 | 130.64(15) | C11                    | C10 | C11 | 118.27(15) |
| C8                     | N2 | N1 | 116.50(14) | C11                    | C10 | C9  | 122.16(17) |
| C15                    | N2 | N1 | 110.96(14) | C10                    | C11 | C12 | 118.87(19) |
| C15                    | N2 | C8 | 129.74(15) | C13                    | C12 | C11 | 120.41(19) |
| C2                     | C1 | N1 | 122.82(17) | C12                    | C13 | C14 | 120.20(19) |
| C2                     | C1 | C6 | 120.64(18) | C13                    | C14 | C9  | 120.77(19) |
| C6                     | C1 | N1 | 116.37(16) | O1                     | C15 | N2  | 124.41(17) |
| C1                     | C2 | C3 | 119.3(2)   | O1                     | C15 | C16 | 130.83(17) |
| C4                     | C3 | C2 | 120.88(19) | N2                     | C15 | C16 | 104.75(15) |
| C3                     | C4 | C5 | 119.63(19) | C17                    | C16 | C15 | 108.73(16) |
| C4                     | C5 | C6 | 121.2(2)   | C21                    | C16 | C15 | 130.11(17) |
| C1                     | C6 | C7 | 118.48(17) | C21                    | C16 | C17 | 120.97(17) |
| C5                     | C6 | C1 | 118.30(18) | N1                     | C17 | C16 | 109.13(15) |
| C5                     | C6 | C7 | 123.20(18) | N1                     | C17 | C18 | 129.87(17) |
| C8                     | C7 | C6 | 121.51(18) | C18                    | C17 | C16 | 120.74(17) |
| N2                     | C8 | C9 | 117.53(15) | C19                    | C18 | C17 | 117.37(18) |
| C7                     | C8 | N2 | 118.01(17) | C18                    | C19 | C20 | 122.04(19) |
| C7                     | C8 | C9 | 124.36(17) | C21                    | C20 | C19 | 120.66(19) |
| C10                    | C9 | C8 | 121.44(16) | C20                    | C21 | C16 | 118.22(18) |
| C14                    | C9 | C8 | 120.96(17) |                        |     |     |            |

**Table 6 Torsion Angles for 3k.**



| A   | B   | C   | D   | Angle/°     | A   | B   | C   | D   | Angle/°     |
|-----|-----|-----|-----|-------------|-----|-----|-----|-----|-------------|
| C11 | C10 | C11 | C12 | 177.25(16)  | C6  | C7  | C8  | N2  | 0.3(3)      |
| O1  | C15 | C16 | C17 | 179.82(19)  | C6  | C7  | C8  | C9  | 176.66(17)  |
| O1  | C15 | C16 | C21 | -5.2(3)     | C7  | C8  | C9  | C10 | -113.8(2)   |
| N1  | N2  | C8  | C7  | 27.0(2)     | C7  | C8  | C9  | C14 | 63.7(3)     |
| N1  | N2  | C8  | C9  | -149.67(15) | C8  | N2  | C15 | O1  | 20.1(3)     |
| N1  | N2  | C15 | O1  | -179.86(17) | C8  | N2  | C15 | C16 | -158.81(17) |
| N1  | N2  | C15 | C16 | 1.20(19)    | C8  | C9  | C10 | C11 | 1.4(2)      |
| N1  | C1  | C2  | C3  | -172.52(17) | C8  | C9  | C10 | C11 | 179.41(17)  |
| N1  | C1  | C6  | C5  | 172.19(17)  | C8  | C9  | C14 | C13 | -178.91(18) |
| N1  | C1  | C6  | C7  | -6.5(2)     | C9  | C10 | C11 | C12 | -0.8(3)     |
| N1  | C17 | C18 | C19 | 173.78(19)  | C10 | C9  | C14 | C13 | -1.4(3)     |
| N2  | N1  | C1  | C2  | -151.77(17) | C10 | C11 | C12 | C13 | -0.8(3)     |
| N2  | N1  | C1  | C6  | 33.1(2)     | C11 | C12 | C13 | C14 | 1.3(3)      |
| N2  | N1  | C17 | C16 | -0.25(19)   | C12 | C13 | C14 | C9  | -0.2(3)     |
| N2  | N1  | C17 | C18 | -174.23(19) | C14 | C9  | C10 | C11 | -176.12(14) |
| N2  | C8  | C9  | C10 | 62.7(2)     | C14 | C9  | C10 | C11 | 1.9(3)      |
| N2  | C8  | C9  | C14 | -119.94(19) | C15 | N2  | C8  | C7  | -173.93(18) |
| N2  | C15 | C16 | C17 | -1.33(19)   | C15 | N2  | C8  | C9  | 9.4(3)      |
| N2  | C15 | C16 | C21 | 173.62(18)  | C15 | C16 | C17 | N1  | 1.0(2)      |
| C1  | N1  | N2  | C8  | -44.2(2)    | C15 | C16 | C17 | C18 | 175.62(17)  |
| C1  | N1  | N2  | C15 | 152.92(15)  | C15 | C16 | C21 | C20 | -175.13(19) |
| C1  | N1  | C17 | C16 | -148.32(18) | C16 | C17 | C18 | C19 | 0.4(3)      |
| C1  | N1  | C17 | C18 | 37.7(3)     | C17 | N1  | N2  | C8  | 162.28(15)  |
| C1  | C2  | C3  | C4  | -0.1(3)     | C17 | N1  | N2  | C15 | -0.63(19)   |
| C1  | C6  | C7  | C8  | -10.8(3)    | C17 | N1  | C1  | C2  | -6.0(3)     |
| C2  | C1  | C6  | C5  | -3.1(3)     | C17 | N1  | C1  | C6  | 178.80(17)  |
| C2  | C1  | C6  | C7  | 178.19(17)  | C17 | C16 | C21 | C20 | -0.7(3)     |
| C2  | C3  | C4  | C5  | -1.5(3)     | C17 | C18 | C19 | C20 | -0.3(3)     |
| C3  | C4  | C5  | C6  | 0.8(3)      | C18 | C19 | C20 | C21 | -0.3(3)     |
| C4  | C5  | C6  | C1  | 1.5(3)      | C19 | C20 | C21 | C16 | 0.8(3)      |
| C4  | C5  | C6  | C7  | -179.89(19) | C21 | C16 | C17 | N1  | -174.51(16) |
| C5  | C6  | C7  | C8  | 170.57(19)  | C21 | C16 | C17 | C18 | 0.1(3)      |
| C6  | C1  | C2  | C3  | 2.5(3)      |     |     |     |     |             |

**Table 7 Hydrogen Atom Coordinates ( $\text{\AA}\times 10^4$ ) and Isotropic Displacement Parameters ( $\text{\AA}^2\times 10^3$ ) for 3k.**

| Atom | x       | y       | z       | U(eq) |
|------|---------|---------|---------|-------|
| H2   | 4400.28 | 3802.25 | 6585.88 | 38    |
| H3   | 5709.08 | 5386.3  | 7292.09 | 46    |

**Table 7 Hydrogen Atom Coordinates ( $\text{\AA}\times 10^4$ ) and Isotropic Displacement Parameters ( $\text{\AA}^2\times 10^3$ ) for 3k.**

| <b>Atom</b> | <b>x</b> | <b>y</b> | <b>z</b> | <b>U(eq)</b> |
|-------------|----------|----------|----------|--------------|
| H4          | 5983.3   | 7991.17  | 6851.6   | 47           |
| H5          | 4994.21  | 9011.91  | 5665.53  | 44           |
| H7          | 3470.02  | 8713.17  | 4509.88  | 35           |
| H11         | -443.69  | 7515.8   | 2802.72  | 39           |
| H12         | 264.21   | 8552.28  | 1582.65  | 47           |
| H13         | 2081.18  | 8803.16  | 1530.57  | 49           |
| H14         | 3213.54  | 7937.01  | 2673.06  | 40           |
| H18         | 2872.99  | 2647.11  | 6728.61  | 37           |
| H19         | 1996.25  | 197.06   | 6662.35  | 43           |
| H20         | 1219.02  | -787.15  | 5378.21  | 44           |
| H21         | 1284.5   | 673.58   | 4115.22  | 37           |

## 8. X-Ray crystal data for compound 5a

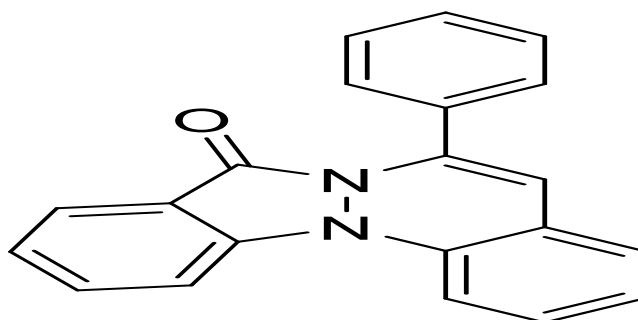

X-ray-quality crystal was obtained by slow diffusion of Petroleum ether into a dilute dichloromethane solution of **5a** at room temperature under air. Thermal ellipsoids drawn at the 50 % probability level. Crystal data were obtained on a SuperNova, Dual, Cu at zero, AtlasS2 diffractometer using Mo K $\alpha$  radiation ( $\lambda = 0.71073 \text{ \AA}$ ). The crystal was kept at 179.99(10) K during data collection.

**Table 1 Crystal data and structure refinement for 5a(d-40f).**

|                                                |                                                                      |
|------------------------------------------------|----------------------------------------------------------------------|
| Identification code                            | d-40f                                                                |
| Empirical formula                              | C <sub>21</sub> H <sub>14</sub> N <sub>2</sub> O <sub>3</sub>        |
| Formula weight                                 | 342.34                                                               |
| Temperature/K                                  | 179.99(10)                                                           |
| Crystal system                                 | monoclinic                                                           |
| Space group                                    | P2 <sub>1</sub> /n                                                   |
| a/ $\text{\AA}$                                | 14.3638(11)                                                          |
| b/ $\text{\AA}$                                | 7.4704(7)                                                            |
| c/ $\text{\AA}$                                | 15.0035(10)                                                          |
| $\alpha$ / $^\circ$                            | 90                                                                   |
| $\beta$ / $^\circ$                             | 94.451(7)                                                            |
| $\gamma$ / $^\circ$                            | 90                                                                   |
| Volume/ $\text{\AA}^3$                         | 1605.1(2)                                                            |
| Z                                              | 4                                                                    |
| $\rho_{\text{calc}}/\text{cm}^3$               | 1.417                                                                |
| $\mu/\text{mm}^{-1}$                           | 0.096                                                                |
| F(000)                                         | 712.0                                                                |
| Crystal size/ $\text{mm}^3$                    | 0.14 $\times$ 0.12 $\times$ 0.1                                      |
| Radiation                                      | Mo K $\alpha$ ( $\lambda = 0.71073$ )                                |
| 2 $\theta$ range for data collection/ $^\circ$ | 4.088 to 49.99                                                       |
| Index ranges                                   | -14 $\leq$ h $\leq$ 17, -6 $\leq$ k $\leq$ 8, -17 $\leq$ l $\leq$ 17 |

|                                                |                                                                  |
|------------------------------------------------|------------------------------------------------------------------|
| Reflections collected                          | 7251                                                             |
| Independent reflections                        | 2824 [ $R_{\text{int}} = 0.0380$ , $R_{\text{sigma}} = 0.0446$ ] |
| Data/restraints/parameters                     | 2824/0/237                                                       |
| Goodness-of-fit on $F^2$                       | 1.030                                                            |
| Final R indexes [ $I \geq 2\sigma(I)$ ]        | $R_1 = 0.0460$ , $wR_2 = 0.1137$                                 |
| Final R indexes [all data]                     | $R_1 = 0.0601$ , $wR_2 = 0.1249$                                 |
| Largest diff. peak/hole / $e \text{ \AA}^{-3}$ | 0.19/-0.25                                                       |

### Crystal structure determination of 5a

**Crystal Data** for  $C_{21}H_{14}N_2O_3$  ( $M = 342.34$  g/mol): monoclinic, space group  $P2_1/n$  (no. 14),  $a = 14.3638(11)$   $\text{\AA}$ ,  $b = 7.4704(7)$   $\text{\AA}$ ,  $c = 15.0035(10)$   $\text{\AA}$ ,  $\beta = 94.451(7)^\circ$ ,  $V = 1605.1(2)$   $\text{\AA}^3$ ,  $Z = 4$ ,  $T = 179.99(10)$  K,  $\mu(\text{Mo K}\alpha) = 0.096$   $\text{mm}^{-1}$ ,  $D_{\text{calc}} = 1.417$   $\text{g/cm}^3$ , 7251 reflections measured ( $4.088^\circ \leq 2\theta \leq 49.99^\circ$ ), 2824 unique ( $R_{\text{int}} = 0.0380$ ,  $R_{\text{sigma}} = 0.0446$ ) which were used in all calculations. The final  $R_1$  was 0.0460 ( $I > 2\sigma(I)$ ) and  $wR_2$  was 0.1249 (all data).

**Table 2 Fractional Atomic Coordinates ( $\times 10^4$ ) and Equivalent Isotropic Displacement Parameters ( $\text{\AA}^2 \times 10^3$ ) for 5a.  $U_{\text{eq}}$  is defined as 1/3 of the trace of the orthogonalised  $U_{ij}$  tensor.**

| Atom | x          | y          | z          | $U(\text{eq})$ |
|------|------------|------------|------------|----------------|
| O2   | 3490.2(9)  | 3844.8(16) | 5229.7(8)  | 31.7(3)        |
| O1   | 1620.9(9)  | 4490(2)    | 4817.3(8)  | 40.3(4)        |
| O3   | 5013.9(9)  | 6559(2)    | 5782.5(9)  | 41.8(4)        |
| N1   | 3110.9(10) | 6040(2)    | 7041.3(9)  | 28.8(4)        |
| N2   | 3523.4(10) | 6302(2)    | 6225.6(9)  | 31.0(4)        |
| C16  | 3206.3(11) | 6857(3)    | 4625.5(11) | 26.9(4)        |
| C15  | 3110.0(12) | 5525(2)    | 5383.2(11) | 27.6(4)        |
| C1   | 1614.6(12) | 5885(2)    | 6224.0(11) | 27.5(4)        |
| C14  | 2051.8(12) | 5228(3)    | 5438.4(11) | 28.8(4)        |
| C6   | 2145.6(12) | 6245(2)    | 7030.1(11) | 26.2(4)        |
| C17  | 3170.9(12) | 6220(3)    | 3755.3(11) | 30.2(5)        |
| C13  | 4480.8(13) | 6500(3)    | 6380.5(12) | 30.3(4)        |
| C7   | 3816.7(13) | 6277(2)    | 7722.5(11) | 29.2(4)        |
| C8   | 4656.1(13) | 6550(3)    | 7345.9(12) | 31.1(5)        |
| C5   | 1691.3(13) | 6724(3)    | 7782.3(12) | 32.8(5)        |
| C18  | 3203.4(13) | 7399(3)    | 3049.3(12) | 34.9(5)        |
| C21  | 3251.8(14) | 8686(3)    | 4771.1(13) | 37.2(5)        |
| C2   | 648.1(12)  | 6038(3)    | 6189.2(12) | 33.8(5)        |
| C19  | 3259.9(14) | 9208(3)    | 3199.7(13) | 39.7(5)        |

**Table 2 Fractional Atomic Coordinates ( $\times 10^4$ ) and Equivalent Isotropic Displacement Parameters ( $\text{\AA}^2 \times 10^3$ ) for 5a.  $U_{eq}$  is defined as 1/3 of the trace of the orthogonalised  $U_{ij}$  tensor.**

| Atom | x          | y       | z          | U(eq)   |
|------|------------|---------|------------|---------|
| C12  | 3787.1(15) | 6190(3) | 8652.1(12) | 37.3(5) |
| C4   | 730.8(14)  | 6842(3) | 7725.4(13) | 39.8(5) |
| C9   | 5491.6(14) | 6733(3) | 7871.6(13) | 39.4(5) |
| C3   | 206.7(13)  | 6518(3) | 6926.7(13) | 40.6(5) |
| C20  | 3279.0(15) | 9860(3) | 4058.2(14) | 45.9(5) |
| C11  | 4616.6(16) | 6421(3) | 9160.1(13) | 44.4(6) |
| C10  | 5458.4(16) | 6681(3) | 8785.3(13) | 45.0(6) |

**Table 3 Anisotropic Displacement Parameters ( $\text{\AA}^2 \times 10^3$ ) for 5a. The Anisotropic displacement factor exponent takes the form:  $-2\pi^2[h^2a^2U_{11}+2hka*b*U_{12}+\dots]$ .**

| Atom | $U_{11}$ | $U_{22}$ | $U_{33}$ | $U_{23}$ | $U_{13}$  | $U_{12}$ |
|------|----------|----------|----------|----------|-----------|----------|
| O2   | 32.3(7)  | 34.6(8)  | 29.4(7)  | -0.2(5)  | 9.6(6)    | 0.9(6)   |
| O1   | 32.6(7)  | 61.4(10) | 26.8(7)  | -10.6(7) | 2.1(6)    | -10.9(7) |
| O3   | 25.8(7)  | 61.5(10) | 39.1(8)  | -6.4(7)  | 9.5(6)    | -3.4(7)  |
| N1   | 25.3(8)  | 43.3(10) | 18.1(7)  | -2.3(6)  | 3.7(6)    | 2.4(7)   |
| N2   | 23.4(8)  | 49.9(10) | 20.0(7)  | -3.7(7)  | 4.5(6)    | -3.0(7)  |
| C16  | 18.3(8)  | 37.0(11) | 25.8(9)  | -2.6(8)  | 3.9(7)    | -2.3(8)  |
| C15  | 26.8(9)  | 36.0(11) | 20.1(8)  | -4.2(8)  | 2.9(7)    | -0.5(9)  |
| C1   | 27.2(9)  | 30.8(10) | 24.6(9)  | -0.5(8)  | 3.5(8)    | -2.6(8)  |
| C14  | 28.4(9)  | 34.2(10) | 23.8(9)  | 1.3(8)   | 1.8(8)    | -2.7(8)  |
| C6   | 25.6(9)  | 27.7(10) | 25.9(9)  | -0.5(7)  | 5.8(8)    | -0.7(8)  |
| C17  | 30.3(10) | 33.8(11) | 26.7(9)  | -2.6(8)  | 2.5(8)    | -3.1(8)  |
| C13  | 22.8(9)  | 36.6(11) | 31.6(10) | -5.2(8)  | 2.8(8)    | 0.1(8)   |
| C7   | 31.0(10) | 30.2(10) | 25.3(9)  | -3.4(8)  | -3.6(8)   | 3.2(8)   |
| C8   | 27.9(10) | 32.1(10) | 32.6(10) | -2.8(8)  | -2.5(8)   | 3.0(8)   |
| C5   | 33.7(10) | 38.3(11) | 27.0(9)  | -5.0(8)  | 6.5(8)    | -1.7(9)  |
| C18  | 31.1(10) | 47.7(12) | 26.1(9)  | 2.1(9)   | 4.4(8)    | -5.6(9)  |
| C21  | 40.0(11) | 38.5(12) | 33.2(10) | -6.4(9)  | 3.5(9)    | -0.8(9)  |
| C2   | 25.1(10) | 43.0(12) | 33.4(10) | -3.5(9)  | 3.4(8)    | -2.4(9)  |
| C19  | 35.7(11) | 45.2(13) | 38.6(11) | 13.6(9)  | 4.9(9)    | -1.7(10) |
| C12  | 43.2(12) | 41.1(12) | 26.9(10) | 0.4(8)   | -1.4(9)   | 5.3(9)   |
| C4   | 35.2(11) | 48.7(13) | 37.5(11) | -8.6(9)  | 16.6(9)   | -1.9(10) |
| C9   | 32.4(11) | 40.2(12) | 43.6(11) | -4.5(9)  | -9.2(9)   | 1.1(9)   |
| C3   | 24.1(10) | 50.8(13) | 47.8(12) | -8.6(10) | 9.0(9)    | -2.3(9)  |
| C20  | 53.8(13) | 32.3(11) | 51.9(13) | 3.5(10)  | 6.6(11)   | -0.7(10) |
| C11  | 56.6(14) | 45.4(13) | 28.8(10) | -2.4(9)  | -12.9(10) | 8.7(11)  |
| C10  | 45.6(12) | 44.2(13) | 41.8(12) | -5.9(10) | -19.2(10) | 4.8(11)  |

**Table 4 Bond Lengths for 5a.**

| Atom | Atom | Length/Å | Atom | Atom | Length/Å |
|------|------|----------|------|------|----------|
| O2   | C15  | 1.395(2) | C6   | C5   | 1.393(2) |
| O1   | C14  | 1.211(2) | C17  | C18  | 1.381(3) |
| O3   | C13  | 1.225(2) | C13  | C8   | 1.451(2) |
| N1   | N2   | 1.414(2) | C7   | C8   | 1.386(3) |
| N1   | C6   | 1.394(2) | C7   | C12  | 1.400(3) |
| N1   | C7   | 1.394(2) | C8   | C9   | 1.391(3) |
| N2   | C15  | 1.473(2) | C5   | C4   | 1.378(3) |
| N2   | C13  | 1.385(2) | C18  | C19  | 1.372(3) |
| C16  | C15  | 1.526(2) | C21  | C20  | 1.386(3) |
| C16  | C17  | 1.387(2) | C2   | C3   | 1.365(3) |
| C16  | C21  | 1.384(3) | C19  | C20  | 1.375(3) |
| C15  | C14  | 1.545(2) | C12  | C11  | 1.375(3) |
| C1   | C14  | 1.463(2) | C4   | C3   | 1.386(3) |
| C1   | C6   | 1.405(2) | C9   | C10  | 1.376(3) |
| C1   | C2   | 1.390(2) | C11  | C10  | 1.386(3) |

**Table 5 Bond Angles for 5a.**

| Atom | Atom | Atom | Angle/°    | Atom | Atom | Atom | Angle/°    |
|------|------|------|------------|------|------|------|------------|
| C6   | N1   | N2   | 117.23(13) | C5   | C6   | C1   | 119.30(17) |
| C6   | N1   | C7   | 131.38(15) | C18  | C17  | C16  | 120.12(18) |
| C7   | N1   | N2   | 106.69(14) | O3   | C13  | N2   | 123.37(16) |
| N1   | N2   | C15  | 121.31(14) | O3   | C13  | C8   | 131.33(17) |
| C13  | N2   | N1   | 110.30(14) | N2   | C13  | C8   | 105.27(15) |
| C13  | N2   | C15  | 121.00(14) | N1   | C7   | C12  | 130.39(18) |
| C17  | C16  | C15  | 118.59(17) | C8   | C7   | N1   | 109.03(15) |
| C21  | C16  | C15  | 122.17(16) | C8   | C7   | C12  | 120.50(17) |
| C21  | C16  | C17  | 119.04(17) | C7   | C8   | C13  | 108.31(15) |
| O2   | C15  | N2   | 111.06(14) | C7   | C8   | C9   | 121.54(17) |
| O2   | C15  | C16  | 113.88(14) | C9   | C8   | C13  | 130.07(18) |
| O2   | C15  | C14  | 106.22(14) | C4   | C5   | C6   | 119.72(17) |
| N2   | C15  | C16  | 109.15(15) | C19  | C18  | C17  | 120.49(18) |
| N2   | C15  | C14  | 110.08(14) | C16  | C21  | C20  | 120.43(18) |
| C16  | C15  | C14  | 106.27(13) | C3   | C2   | C1   | 121.09(17) |
| C6   | C1   | C14  | 121.31(16) | C18  | C19  | C20  | 119.97(19) |
| C2   | C1   | C14  | 119.17(15) | C11  | C12  | C7   | 117.0(2)   |
| C2   | C1   | C6   | 119.37(17) | C5   | C4   | C3   | 121.08(18) |
| O1   | C14  | C15  | 118.06(15) | C10  | C9   | C8   | 117.8(2)   |

**Table 5 Bond Angles for 5a.**

| Atom | Atom | Atom | Angle/°    | Atom | Atom | Atom | Angle/°    |
|------|------|------|------------|------|------|------|------------|
| O1   | C14  | C1   | 123.17(16) | C2   | C3   | C4   | 119.43(18) |
| C1   | C14  | C15  | 118.75(15) | C19  | C20  | C21  | 119.9(2)   |
| N1   | C6   | C1   | 117.53(15) | C12  | C11  | C10  | 122.58(19) |
| C5   | C6   | N1   | 123.13(16) | C9   | C10  | C11  | 120.46(19) |

**Table 6 Torsion Angles for 5a.**

| A   | B   | C   | D   | Angle/°     | A   | B   | C   | D   | Angle/°     |
|-----|-----|-----|-----|-------------|-----|-----|-----|-----|-------------|
| O2  | C15 | C14 | O1  | -55.1(2)    | C6  | N1  | C7  | C8  | -158.40(19) |
| O2  | C15 | C14 | C1  | 126.32(16)  | C6  | N1  | C7  | C12 | 24.9(3)     |
| O3  | C13 | C8  | C7  | -174.6(2)   | C6  | C1  | C14 | O1  | 161.06(18)  |
| O3  | C13 | C8  | C9  | 2.2(4)      | C6  | C1  | C14 | C15 | -20.4(3)    |
| N1  | N2  | C15 | O2  | -91.95(18)  | C6  | C1  | C2  | C3  | -0.5(3)     |
| N1  | N2  | C15 | C16 | 141.68(15)  | C6  | C5  | C4  | C3  | -0.9(3)     |
| N1  | N2  | C15 | C14 | 25.4(2)     | C17 | C16 | C15 | O2  | 33.2(2)     |
| N1  | N2  | C13 | O3  | 172.14(18)  | C17 | C16 | C15 | N2  | 157.94(15)  |
| N1  | N2  | C13 | C8  | -6.1(2)     | C17 | C16 | C15 | C14 | -83.39(19)  |
| N1  | C6  | C5  | C4  | -177.83(18) | C17 | C16 | C21 | C20 | -1.2(3)     |
| N1  | C7  | C8  | C13 | 0.5(2)      | C17 | C18 | C19 | C20 | -0.4(3)     |
| N1  | C7  | C8  | C9  | -176.62(17) | C13 | N2  | C15 | O2  | 55.1(2)     |
| N1  | C7  | C12 | C11 | 177.57(19)  | C13 | N2  | C15 | C16 | -71.3(2)    |
| N2  | N1  | C6  | C1  | 28.3(2)     | C13 | N2  | C15 | C14 | 172.46(16)  |
| N2  | N1  | C6  | C5  | -154.01(17) | C13 | C8  | C9  | C10 | -178.0(2)   |
| N2  | N1  | C7  | C8  | -4.14(19)   | C7  | N1  | N2  | C15 | 156.69(16)  |
| N2  | N1  | C7  | C12 | 179.17(18)  | C7  | N1  | N2  | C13 | 6.49(19)    |
| N2  | C15 | C14 | O1  | -175.41(17) | C7  | N1  | C6  | C1  | -179.57(18) |
| N2  | C15 | C14 | C1  | 6.0(2)      | C7  | N1  | C6  | C5  | -1.9(3)     |
| N2  | C13 | C8  | C7  | 3.4(2)      | C7  | C8  | C9  | C10 | -1.6(3)     |
| N2  | C13 | C8  | C9  | -179.80(19) | C7  | C12 | C11 | C10 | -1.7(3)     |
| C16 | C15 | C14 | O1  | 66.5(2)     | C8  | C7  | C12 | C11 | 1.2(3)      |
| C16 | C15 | C14 | C1  | -112.07(17) | C8  | C9  | C10 | C11 | 1.1(3)      |
| C16 | C17 | C18 | C19 | -0.8(3)     | C5  | C4  | C3  | C2  | 1.4(3)      |
| C16 | C21 | C20 | C19 | 0.1(3)      | C18 | C19 | C20 | C21 | 0.7(3)      |
| C15 | N2  | C13 | O3  | 21.8(3)     | C21 | C16 | C15 | O2  | -152.11(17) |
| C15 | N2  | C13 | C8  | -156.38(16) | C21 | C16 | C15 | N2  | -27.4(2)    |
| C15 | C16 | C17 | C18 | 176.39(15)  | C21 | C16 | C15 | C14 | 91.31(19)   |
| C15 | C16 | C21 | C20 | -175.85(17) | C21 | C16 | C17 | C18 | 1.5(3)      |
| C1  | C6  | C5  | C4  | -0.2(3)     | C2  | C1  | C14 | O1  | -14.5(3)    |
| C1  | C2  | C3  | C4  | -0.6(3)     | C2  | C1  | C14 | C15 | 164.02(17)  |

**Table 6 Torsion Angles for 5a.**

| A   | B  | C  | D   | Angle/°     | A   | B   | C   | D   | Angle/°    |
|-----|----|----|-----|-------------|-----|-----|-----|-----|------------|
| C14 | C1 | C6 | N1  | 3.1(3)      | C2  | C1  | C6  | N1  | 178.68(17) |
| C14 | C1 | C6 | C5  | -174.62(17) | C2  | C1  | C6  | C5  | 0.9(3)     |
| C14 | C1 | C2 | C3  | 175.12(19)  | C12 | C7  | C8  | C13 | 177.54(17) |
| C6  | N1 | N2 | C15 | -44.8(2)    | C12 | C7  | C8  | C9  | 0.5(3)     |
| C6  | N1 | N2 | C13 | 164.99(16)  | C12 | C11 | C10 | C9  | 0.6(3)     |

**Table 7 Hydrogen Atom Coordinates ( $\text{\AA} \times 10^4$ ) and Isotropic Displacement Parameters ( $\text{\AA}^2 \times 10^3$ ) for 5a.**

| Atom | x       | y        | z       | U(eq) |
|------|---------|----------|---------|-------|
| H2   | 3965.52 | 3963.85  | 4966.19 | 48    |
| H17  | 3125.23 | 4995.7   | 3646.93 | 36    |
| H5   | 2034.56 | 6962.19  | 8320.45 | 39    |
| H18  | 3186.93 | 6963.1   | 2467.64 | 42    |
| H21  | 3264.14 | 9129.45  | 5351.03 | 45    |
| H2A  | 296.16  | 5808.88  | 5654.73 | 41    |
| H19  | 3285.19 | 9993.93  | 2721.39 | 48    |
| H12  | 3230.99 | 5985.74  | 8914.23 | 45    |
| H4   | 429.6   | 7144.72  | 8231.11 | 48    |
| H9   | 6054.53 | 6886.17  | 7613.86 | 47    |
| H3   | -440.05 | 6627.12  | 6893.52 | 49    |
| H20  | 3310.22 | 11086.96 | 4160.43 | 55    |
| H11  | 4612.95 | 6402.37  | 9779.65 | 53    |
| H10  | 6004.53 | 6820.57  | 9154.01 | 54    |

## Experimental

Single crystals of  $\text{C}_{21}\text{H}_{14}\text{N}_2\text{O}_3$  were [5a]. A suitable crystal was selected and [5a] on a SuperNova, Dual, Cu at zero, AtlasS2 diffractometer. The crystal was kept at 179.99(10) K during data collection. Using Olex2 [1], the structure was solved with the SHELXT [2] structure solution program using Intrinsic Phasing and refined with the SHELXL [3] refinement package using Least Squares minimisation.

1. Dolomanov, O.V., Bourhis, L.J., Gildea, R.J., Howard, J.A.K. & Puschmann, H. (2009), *J. Appl. Cryst.* 42, 339-341.
2. Sheldrick, G.M. (2015). *Acta Cryst.* A71, 3-8.
3. Sheldrick, G.M. (2015). *Acta Cryst.* C71,



2. a Aromatic/amide H refined with riding coordinates:

C17(H17), C5(H5), C18(H18), C21(H21), C2(H2A), C19(H19), C12(H12), C4(H4),

C9(H9), C3(H3), C20(H20), C11(H11), C10(H10)

2. b Idealised tetrahedral OH refined as rotating group:

O2(H2)

## 9. Product characterization

### 6-phenyl-8*H*-indazolo[1,2-*a*]cinnolin-8-one (3a)

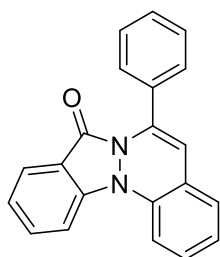

The reaction was performed according to general procedure A with 1-phenyl-1,2-dihydro-3*H*-indazol-3-one **1a** (42.0 mg, 0.2 mmol) and 2-(dimethyl(oxo)- $\lambda^6$ -sulfanylidene)-1-phenylethan-1-one **2a** (58.9 mg, 0.3 mmol). After purification by silica gel chromatography (petroleum ether/ethyl acetate = 8:1,  $R_f$  = 0.2), the desired product **3a** was obtained as a yellow solid (56.7 mg, 91 % yield). **<sup>1</sup>H NMR** (400 MHz, CDCl<sub>3</sub>)  $\delta$  8.00 (d,  $J$  = 7.8 Hz, 1H), 7.82 (d,  $J$  = 8.4 Hz, 1H), 7.73 (t,  $J$  = 7.7 Hz, 1H), 7.62 (d,  $J$  = 8.0 Hz, 1H), 7.42 (dd,  $J$  = 8.6, 5.5 Hz, 5H), 7.35 (t,  $J$  = 7.4 Hz, 1H), 7.23 (d,  $J$  = 8.3 Hz, 2H), 7.08 (t,  $J$  = 7.4 Hz, 1H), 6.22 (s, 1H). **<sup>13</sup>C NMR** (101 MHz, CDCl<sub>3</sub>)  $\delta$  156.0, 140.0, 138.5, 137.5, 132.3, 132.1, 129.1, 129.0, 128.0, 128.0, 127.2, 124.5, 124.3, 123.4, 123.2, 118.7, 114.3, 112.7, 111.1. **HRMS (ESI)**  $m/z$  calcd. for C<sub>21</sub>H<sub>15</sub>N<sub>2</sub>O<sup>+</sup> [M+H]<sup>+</sup> : 311.1184, found: 311.1187.

### 6-(*p*-tolyl)-8*H*-indazolo[1,2-*a*]cinnolin-8-one (3b)

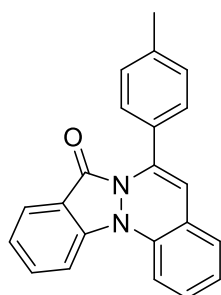

The reaction was performed according to general procedure A with 1-phenyl-1,2-dihydro-3*H*-indazol-3-one **1a** (42.1 mg, 0.2 mmol) and 2-(dimethyl(oxo)- $\lambda^6$ -sulfanylidene)-1-(*p*-tolyl)ethan-1-one **2b** (63.1 mg, 0.3 mmol). After purification by silica gel chromatography (petroleum ether/ethyl acetate = 5:1,  $R_f$  = 0.2), the desired product **3b** was obtained as a yellow solid (60.8 mg, 94 % yield). **<sup>1</sup>H NMR** (400 MHz, CDCl<sub>3</sub>)  $\delta$  7.95 (d,  $J$  = 7.8 Hz, 1H), 7.86 (d,  $J$  = 8.5 Hz, 1H), 7.73 (t,  $J$  = 7.8 Hz, 1H), 7.68 (d,  $J$  = 8.2 Hz, 1H), 7.41 (d,  $J$  = 7.4 Hz, 1H), 7.37 – 7.33 (m, 1H), 7.30 (dd,  $J$  = 14.1, 6.9 Hz, 3H), 7.24 (d,  $J$  = 4.6 Hz, 1H), 7.22 (d,  $J$  = 4.2 Hz, 1H), 7.11 (t,  $J$  = 7.5 Hz, 1H), 6.03 (s, 1H), 2.22 (s, 3H). **<sup>13</sup>C NMR** (101 MHz, CDCl<sub>3</sub>)  $\delta$  155.3, 139.0, 137.7, 137.5, 136.9, 132.8, 132.4, 129.7, 129.3, 129.2, 128.9, 127.0, 125.8, 124.6, 124.3, 123.4, 122.6, 117.7, 113.4, 111.6, 111.4, 19.6. **HRMS (ESI)**  $m/z$  calcd. for C<sub>22</sub>H<sub>17</sub>N<sub>2</sub>O<sup>+</sup> [M+H]<sup>+</sup> : 325.1341, found: 325.1342.

### 6-(4-methoxyphenyl)-8*H*-indazolo[1,2-*a*]cinnolin-8-one (**3c**)

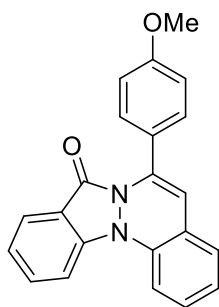

The reaction was performed according to general procedure A with 1-phenyl-1,2-dihydro-3*H*-indazol-3-one **1a** (42.0 mg, 0.2 mmol) and 2-(dimethyl(oxo)- $\lambda^6$ -sulfanylidene)-1-(4-methoxyphenyl)ethan-1-one **2c** (67.9 mg, 0.3 mmol). After purification by silica gel chromatography (petroleum ether/ethyl acetate = 2:1,  $R_f$  = 0.2), the desired product **3c** was obtained as a yellow solid (60.8 mg, 94 % yield). **<sup>1</sup>H NMR** (400 MHz, CDCl<sub>3</sub>)  $\delta$  8.00 (d,  $J$  = 7.9 Hz, 1H), 7.83 (d,  $J$  = 8.4 Hz, 1H), 7.74 (t,  $J$  = 7.7 Hz, 1H), 7.63 (d,  $J$  = 8.4 Hz, 1H), 7.40 (d,  $J$  = 8.8 Hz, 2H), 7.35 (d,  $J$  = 7.3 Hz, 1H), 7.23 (d,  $J$  = 7.3 Hz, 2H), 7.09 (t,  $J$  = 7.4 Hz, 1H), 6.94 (d,  $J$  = 8.6 Hz, 2H), 6.19 (s, 1H), 3.84 (s, 3H). **<sup>13</sup>C NMR** (101 MHz, CDCl<sub>3</sub>)  $\delta$  160.4, 156.1, 140.1, 138.5, 137.4, 132.3, 129.4, 128.7, 127.0, 124.6, 124.5, 124.4, 123.7, 123.3, 118.9, 114.5, 113.5, 111.6, 111.1, 55.5. **HRMS (ESI)**  $m/z$  calcd. for C<sub>22</sub>H<sub>17</sub>N<sub>2</sub>O<sub>2</sub><sup>+</sup> [M+H]<sup>+</sup> : 341.1290, found: 341.1292.

### 6-([1,1'-biphenyl]-4-yl)-8*H*-indazolo[1,2-*a*]cinnolin-8-one (**3d**)

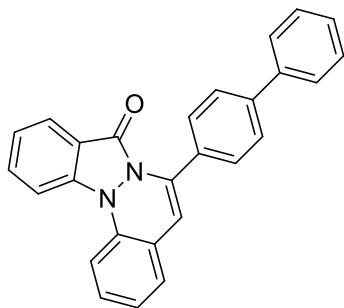

The reaction was performed according to general procedure A with 1-phenyl-1,2-dihydro-3*H*-indazol-3-one **1a** (41.8 mg, 0.2 mmol) and 1-([1,1'-biphenyl]-4-yl)-2-(dimethyl(oxo)- $\lambda^6$ -sulfanylidene)ethan-1-one **2d** (81.7 mg, 0.3 mmol). After purification by silica gel chromatography (petroleum ether/ethyl acetate = 4:1,  $R_f$  = 0.2), the desired product **3d** was obtained as a yellow solid (70.8 mg, 92 % yield). **<sup>1</sup>H NMR** (400 MHz, CDCl<sub>3</sub>)  $\delta$  7.96 (d,  $J$  = 7.8 Hz, 1H), 7.77 (d,  $J$  = 8.4 Hz, 1H), 7.69 (t,  $J$  = 7.8 Hz, 1H), 7.57 (dd,  $J$  = 7.4, 5.1 Hz, 5H), 7.46 (d,  $J$  = 8.3 Hz, 2H), 7.37 (t,  $J$  = 7.5 Hz, 2H), 7.31 (t,  $J$  = 6.1 Hz, 1H), 7.28 (d,  $J$  = 4.7 Hz, 1H), 7.22 – 7.17 (m, 2H), 7.04 (t,  $J$  = 7.5 Hz, 1H), 6.23 (s, 1H). **<sup>13</sup>C NMR** (101 MHz, CDCl<sub>3</sub>)  $\delta$  156.2, 142.0, 140.8, 140.2, 138.7, 137.2, 132.4, 131.1, 129.1, 128.9, 128.4, 127.6, 127.3, 127.3, 126.8, 124.6, 124.4, 123.5, 123.4, 118.9, 114.5, 112.9, 111.2. **HRMS (ESI)**  $m/z$  calcd. for C<sub>27</sub>H<sub>19</sub>N<sub>2</sub>O<sup>+</sup> [M+H]<sup>+</sup> : 387.1497, found: 387.1500.

### 6-(4-bromophenyl)-8H-indazolo[1,2-a]cinnolin-8-one (3e)

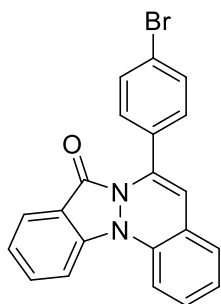

The reaction was performed according to general procedure A with 1-phenyl-1,2-dihydro-3H-indazol-3-one **1a** (42.0 mg, 0.2 mmol) and 1-(4-bromophenyl)-2-(dimethyl(oxo)- $\lambda^6$ -sulfanylidene)ethan-1-one **2e** (82.5 mg, 0.3 mmol). After purification by silica gel chromatography (petroleum ether/ethyl acetate = 5:1,  $R_f$  = 0.2), the desired product **3e** was obtained as a yellow solid (69.1 mg, 89 % yield).  **$^1\text{H NMR}$**  (400 MHz,  $\text{CDCl}_3$ )  $\delta$  8.01 (d,  $J$  = 7.8 Hz, 1H), 7.85 (d,  $J$  = 8.4 Hz, 1H), 7.77 (t,  $J$  = 7.8 Hz, 1H), 7.65 (d,  $J$  = 8.2 Hz, 1H), 7.55 (d,  $J$  = 8.4 Hz, 2H), 7.39 (t,  $J$  = 7.5 Hz, 1H), 7.33 (d,  $J$  = 8.4 Hz, 2H), 7.30 – 7.24 (m, 2H), 7.12 (t,  $J$  = 7.5 Hz, 1H), 6.24 (s, 1H).  **$^{13}\text{C NMR}$**  (101 MHz,  $\text{CDCl}_3$ )  $\delta$  156.0, 140.1, 138.5, 136.4, 132.4, 131.2, 131.0, 129.4, 129.2, 127.3, 124.5, 124.4, 123.3, 123.1, 118.5, 114.3, 113.0, 111.1. **HRMS (ESI)**  $m/z$  calcd. for  $\text{C}_{21}\text{H}_{14}\text{BrN}_2\text{O}^+$   $[\text{M}+\text{H}]^+$  : 389.0290, found: 389.0292.

### 6-(4-(trifluoromethyl)phenyl)-8H-indazolo[1,2-a]cinnolin-8-one (3f)

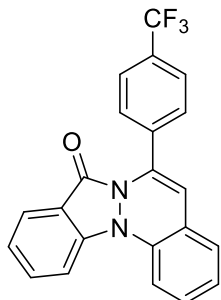

The reaction was performed according to general procedure A with 1-phenyl-1,2-dihydro-3H-indazol-3-one **1a** (41.9 mg, 0.2 mmol) and 2-(dimethyl(oxo)- $\lambda^6$ -sulfanylidene)-1-(4-(trifluoromethyl)phenyl)ethan-1-one **2f** (79.3 mg, 0.3 mmol). After purification by silica gel chromatography (petroleum ether/ethyl acetate = 4:1,  $R_f$  = 0.2), the desired product **3f** was obtained as a yellow solid (74.5 mg, 98 % yield).  **$^1\text{H NMR}$**  (400 MHz,  $\text{CDCl}_3$ )  $\delta$  7.99 (d,  $J$  = 7.8 Hz, 1H), 7.83 (d,  $J$  = 8.3 Hz, 1H), 7.76 (t,  $J$  = 7.7 Hz, 1H), 7.64 (t,  $J$  = 6.7 Hz, 3H), 7.54 (d,  $J$  = 8.2 Hz, 2H), 7.37 (t,  $J$  = 7.5 Hz, 1H), 7.31 – 7.26 (m, 1H), 7.25 (d,  $J$  = 8.6 Hz, 1H), 7.10 (t,  $J$  = 7.5 Hz, 1H), 6.27 (s, 1H).  **$^{13}\text{C NMR}$**  (101 MHz,  $\text{CDCl}_3$ )  $\delta$  156.0, 140.2, 138.6, 136.0, 135.7, 132.6, 130.9 (d,  $J$  = 32.6 Hz), 129.7, 128.2, 127.6, 125.5, 125.0 (q,  $J$  = 3.7 Hz), 124.5 (d,  $J$  = 6.3 Hz), 123.5, 122.9, 122.8, 118.5, 114.4, 114.1, 111.2.  **$^{19}\text{F NMR}$**  (376 MHz,  $\text{CDCl}_3$ )  $\delta$  -62.62. **HRMS (ESI)**  $m/z$  calcd. for  $\text{C}_{22}\text{H}_{14}\text{F}_3\text{N}_2\text{O}^+$   $[\text{M}+\text{H}]^+$  : 379.1058, found: 379.1060.

### 6-(4-(trifluoromethoxy)phenyl)-8*H*-indazolo[1,2-*a*]cinnolin-8-one (3g)

The reaction was performed according to general procedure A with

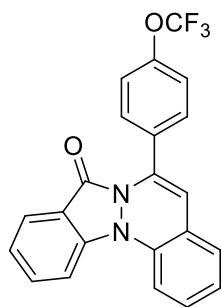

1-phenyl-1,2-dihydro-3*H*-indazol-3-one **1a** (42.1 mg, 0.2 mmol) and

2-(dimethyl(oxo)- $\lambda^6$ -sulfanylidene)-1-(4-(trifluoromethoxy)phenyl)ethan-1-

one **2g** (84.1 mg, 0.3 mmol). After purification by silica gel chromatography

(petroleum ether/ethyl acetate = 6:1,  $R_f$  = 0.2), the desired product **3g** was

obtained as a yellow solid (35.7 mg, 45 % yield). **<sup>1</sup>H NMR** (400 MHz,

$CDCl_3$ )  $\delta$  8.02 (d,  $J$  = 7.8 Hz, 1H), 7.86 (d,  $J$  = 8.4 Hz, 1H), 7.78 (t,  $J$  = 7.8

Hz, 1H), 7.67 (d,  $J$  = 8.1 Hz, 1H), 7.49 (d,  $J$  = 8.7 Hz, 2H), 7.39 (t,  $J$  = 7.5 Hz, 1H), 7.31 (d,  $J$  =

7.6 Hz, 1H), 7.27 (d,  $J$  = 6.2 Hz, 3H), 7.13 (t,  $J$  = 7.5 Hz, 1H), 6.25 (s, 1H). **<sup>13</sup>C NMR** (101 MHz,

$CDCl_3$ )  $\delta$  156.1, 149.8, 140.2, 138.6, 136.2, 132.5, 130.8, 129.5, 129.4, 127.4, 124.6, 124.5, 123.5,

123.2, 120.4, 118.6, 114.4, 113.3, 111.3. **<sup>19</sup>F NMR** (376 MHz,  $CDCl_3$ )  $\delta$  -57.60. **HRMS (ESI)**  $m/z$

calcd. for  $C_{22}H_{14}F_3N_2O_2^+$   $[M+H]^+$  : 395.1007, found: 395.1010.

### methyl 4-(8-oxo-8*H*-indazolo[1,2-*a*]cinnolin-6-yl)benzoate (3h)

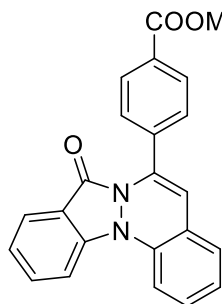

The reaction was performed according to general procedure A with

1-phenyl-1,2-dihydro-3*H*-indazol-3-one **1a** (42.0 mg, 0.2 mmol) and

methyl 4-(2-(dimethyl(oxo)- $\lambda^6$ -sulfanylidene)acetyl)benzoate **2h** (76.3 mg,

0.3 mmol). After purification by silica gel chromatography (petroleum

ether/ethyl acetate = 2:1,  $R_f$  = 0.2), the desired product **3h** was obtained as

a yellow solid (66.4 mg, 90 % yield). **<sup>1</sup>H NMR** (400 MHz,  $CDCl_3$ )  $\delta$  8.09

(d,  $J$  = 8.2 Hz, 2H), 8.01 (d,  $J$  = 7.8 Hz, 1H), 7.85 (d,  $J$  = 8.4 Hz, 1H), 7.77 (t,  $J$  = 7.7 Hz, 1H),

7.65 (d,  $J$  = 8.1 Hz, 1H), 7.52 (d,  $J$  = 8.2 Hz, 2H), 7.39 (t,  $J$  = 7.5 Hz, 1H), 7.29 (dd,  $J$  = 13.6, 7.6

Hz, 2H), 7.12 (t,  $J$  = 7.5 Hz, 1H), 6.32 (s, 1H), 3.93 (s, 3H). **<sup>13</sup>C NMR** (101 MHz,  $CDCl_3$ )  $\delta$  166.8,

156.1, 140.2, 138.7, 136.5, 136.4, 132.5, 130.5, 129.6, 129.3, 127.8, 127.6, 124.6, 124.5, 123.5,

123.0, 118.6, 114.4, 114.1, 111.2, 52.3. **HRMS (ESI)**  $m/z$  calcd. for  $C_{23}H_{17}N_2O_3^+$   $[M+H]^+$  :

369.1239, found: 369.1240.

### 6-(3-methoxyphenyl)-8*H*-indazolo[1,2-*a*]cinnolin-8-one (**3i**)

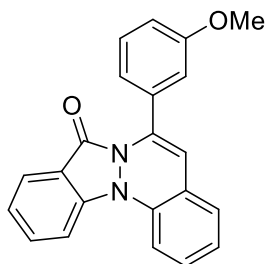

The reaction was performed according to general procedure A with 1-phenyl-1,2-dihydro-3*H*-indazol-3-one **1a** (42.1 mg, 0.2 mmol) and 2-(dimethyl(oxo)- $\lambda^6$ -sulfanylidene)-1-(3-methoxyphenyl)ethan-1-one **2i** (67.9 mg, 0.3 mmol). After purification by silica gel chromatography (petroleum ether/ethyl acetate = 2:1,  $R_f$  = 0.2), the desired product **3i** was obtained as a yellow solid (62.7 mg, 92 % yield). **<sup>1</sup>H NMR** (400 MHz, CDCl<sub>3</sub>)  $\delta$  8.03 (d,  $J$  = 7.9 Hz, 1H), 7.86 (d,  $J$  = 8.4 Hz, 1H), 7.77 (t,  $J$  = 7.8 Hz, 1H), 7.66 (d,  $J$  = 8.1 Hz, 1H), 7.42 – 7.37 (m, 1H), 7.37 – 7.32 (m, 1H), 7.28 (t,  $J$  = 8.7 Hz, 2H), 7.12 (t,  $J$  = 7.5 Hz, 1H), 7.05 (d,  $J$  = 8.1 Hz, 1H), 7.03 (d,  $J$  = 2.3 Hz, 1H), 6.98 (dd,  $J$  = 8.2, 1.8 Hz, 1H), 6.27 (s, 1H), 3.86 (s, 3H). **<sup>13</sup>C NMR** (101 MHz, CDCl<sub>3</sub>)  $\delta$  159.3, 156.0, 140.2, 138.7, 137.4, 133.6, 132.3, 129.1, 129.0, 127.2, 124.6, 124.4, 123.4, 123.3, 120.6, 118.9, 114.7, 114.4, 113.7, 112.8, 111.1, 55.4. **HRMS (ESI)**  $m/z$  calcd. for C<sub>22</sub>H<sub>17</sub>N<sub>2</sub>O<sub>2</sub><sup>+</sup> [M+H]<sup>+</sup> : 341.1290, found: 341.1293.

### 6-(3-chlorophenyl)-8*H*-indazolo[1,2-*a*]cinnolin-8-one (**3j**)

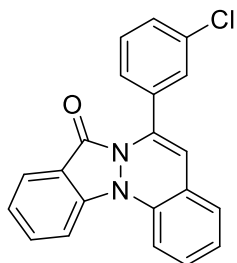

The reaction was performed according to general procedure A with 1-phenyl-1,2-dihydro-3*H*-indazol-3-one **1a** (42.0 mg, 0.2 mmol) and 1-(3-chlorophenyl)-2-(dimethyl(oxo)- $\lambda^6$ -sulfanylidene)ethan-1-one **2j** (69.2 mg, 0.3 mmol). After purification by silica gel chromatography (petroleum ether/ethyl acetate = 4:1,  $R_f$  = 0.2), the desired product **3j** was obtained as a yellow solid (63.0 mg, 91 % yield). **<sup>1</sup>H NMR** (400 MHz, CDCl<sub>3</sub>)  $\delta$  7.96 (d,  $J$  = 7.8 Hz, 1H), 7.79 (d,  $J$  = 8.4 Hz, 1H), 7.71 (t,  $J$  = 7.7 Hz, 1H), 7.59 (d,  $J$  = 8.2 Hz, 1H), 7.42 (s, 1H), 7.36 – 7.30 (m, 2H), 7.28 (d,  $J$  = 8.7 Hz, 1H), 7.26 – 7.24 (m, 1H), 7.21 (dd,  $J$  = 8.8, 6.5 Hz, 2H), 7.06 (t,  $J$  = 7.5 Hz, 1H), 6.19 (s, 1H). **<sup>13</sup>C NMR** (101 MHz, CDCl<sub>3</sub>)  $\delta$  156.0, 140.2, 138.7, 136.1, 134.1, 133.9, 132.5, 129.4, 129.2, 129.1, 127.9, 127.4, 126.4, 124.6, 124.5, 123.5, 123.1, 118.6, 114.4, 113.6, 111.2. **HRMS (ESI)**  $m/z$  calcd. for C<sub>21</sub>H<sub>14</sub>ClN<sub>2</sub>O<sup>+</sup> [M+H]<sup>+</sup> : 345.0795, found: 345.0796.

### 6-(2-chlorophenyl)-8*H*-indazolo[1,2-*a*]cinnolin-8-one (**3k**)

The reaction was performed according to general procedure A with 1-phenyl-1,2-dihydro-3*H*-indazol-3-one **1a** (42.2 mg, 0.2 mmol) and

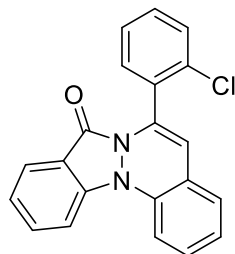

1-(2-chlorophenyl)-2-(dimethyl(oxo)- $\lambda^6$ -sulfanylidene)ethan-1-one **2k** (69.2 mg, 0.3 mmol). After purification by silica gel chromatography

(petroleum ether/ethyl acetate = 3:1,  $R_f$  = 0.2), the desired product **3k** was

obtained as a yellow solid (57.2 mg, 83 % yield).  $^1\text{H NMR}$  (400 MHz,

$\text{CDCl}_3$ )  $\delta$  7.89 (d,  $J$  = 7.8 Hz, 1H), 7.77 (d,  $J$  = 8.5 Hz, 1H), 7.65 (t,  $J$  = 7.8

Hz, 1H), 7.60 (d,  $J$  = 8.2 Hz, 1H), 7.44 (dd,  $J$  = 6.6, 2.3 Hz, 1H), 7.37 – 7.27 (m, 3H), 7.23 (dd,  $J$

= 13.1, 7.3 Hz, 2H), 7.16 (d,  $J$  = 8.6 Hz, 1H), 7.02 (t,  $J$  = 7.5 Hz, 1H), 6.02 (s, 1H).  $^{13}\text{C NMR}$  (101

MHz,  $\text{CDCl}_3$ )  $\delta$  155.5, 139.1, 138.0, 135.2, 133.7, 132.5, 132.1, 130.7, 130.5, 129.4, 129.2, 127.3,

126.9, 124.7, 124.3, 123.0, 122.7, 117.7, 113.3, 112.8, 111.4. **HRMS (ESI)**  $m/z$  calcd. for

$\text{C}_{21}\text{H}_{14}\text{ClN}_2\text{O}^+$   $[\text{M}+\text{H}]^+$  : 345.0795, found: 345.0796.

### 6-(3-fluoro-4-methylphenyl)-8*H*-indazolo[1,2-*a*]cinnolin-8-one (**3l**)

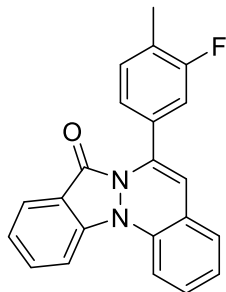

The reaction was performed according to general procedure A with

1-phenyl-1,2-dihydro-3*H*-indazol-3-one **1a** (42.2 mg, 0.2 mmol) and

2-(dimethyl(oxo)- $\lambda^6$ -sulfanylidene)-1-(3-fluoro-4-methylphenyl)ethan-1-o

ne **2l** (68.5 mg, 0.3 mmol). After purification by silica gel chromatography

(petroleum ether/ethyl acetate = 4:1,  $R_f$  = 0.2), the desired product **3l** was

obtained as a yellow solid (58.4 mg, 85 % yield).  $^1\text{H NMR}$  (400 MHz,  $\text{CDCl}_3$ )  $\delta$  8.07 (d,  $J$  = 7.8

Hz, 1H), 7.89 (d,  $J$  = 8.4 Hz, 1H), 7.82 (t,  $J$  = 7.7 Hz, 1H), 7.69 (d,  $J$  = 8.1 Hz, 1H), 7.44 (t,  $J$  =

7.5 Hz, 1H), 7.31 (dt,  $J$  = 15.0, 7.3 Hz, 3H), 7.19 (s, 1H), 7.17 (dd,  $J$  = 8.5, 5.8 Hz, 2H), 6.29 (s,

1H), 2.38 (s, 3H).  $^{13}\text{C NMR}$  (101 MHz,  $\text{CDCl}_3$ )  $\delta$  160.8 (d,  $J$  = 244.6 Hz), 156.0, 140.2, 138.7,

136.4, 132.4, 131.5 (d,  $J$  = 8.3 Hz), 131.0 (d,  $J$  = 5.5 Hz), 129.2, 127.3, 126.0 (d,  $J$  = 17.3 Hz),

124.6, 124.4, 123.5 (d,  $J$  = 3.3 Hz), 123.4, 123.3, 118.8, 114.6 (d,  $J$  = 24.0 Hz), 114.5, 112.9, 111.1,

14.71 (d,  $J$  = 3.3 Hz).  $^{19}\text{F NMR}$  (376 MHz,  $\text{CDCl}_3$ )  $\delta$  -117.44. **HRMS (ESI)**  $m/z$  calcd. for

$\text{C}_{22}\text{H}_{16}\text{FN}_2\text{O}^+$   $[\text{M}+\text{H}]^+$  : 343.1247, found: 343.1247

### 6-(3,5-dimethylphenyl)-8*H*-indazolo[1,2-*a*]cinnolin-8-one (3m)

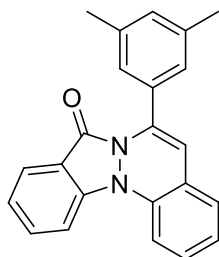

The reaction was performed according to general procedure A with 1-phenyl-1,2-dihydro-3*H*-indazol-3-one **1a** (41.9 mg, 0.2 mmol) and 2-(dimethyl(oxo)- $\lambda^6$ -sulfanylidene)-1-(3,5-dimethylphenyl)ethan-1-one **2m** (67.3 mg, 0.3 mmol). After purification by silica gel chromatography (petroleum ether/ethyl acetate = 4:1,  $R_f$  = 0.2), the desired product **3m** was obtained as a yellow solid (31.6 mg, 47 % yield). **<sup>1</sup>H NMR** (400 MHz, CDCl<sub>3</sub>)  $\delta$  8.05 (d,  $J$  = 7.8 Hz, 1H), 7.87 (d,  $J$  = 8.4 Hz, 1H), 7.78 (t,  $J$  = 7.7 Hz, 1H), 7.67 (d,  $J$  = 8.0 Hz, 1H), 7.40 (t,  $J$  = 7.5 Hz, 1H), 7.28 (t,  $J$  = 8.2 Hz, 2H), 7.15 – 7.10 (m, 2H), 7.09 (d,  $J$  = 8.3 Hz, 3H), 6.24 (s, 1H), 2.39 (s, 6H). **<sup>13</sup>C NMR** (101 MHz, CDCl<sub>3</sub>)  $\delta$  156.0, 140.2, 138.7, 137.9, 137.5, 132.2, 131.1, 128.8, 127.1, 125.8, 124.6, 124.4, 123.7, 123.3, 119.0, 114.5, 112.5, 111.1, 21.5. **HRMS (ESI)**  $m/z$  calcd. for C<sub>23</sub>H<sub>19</sub>N<sub>2</sub>O<sup>+</sup> [M+H]<sup>+</sup> : 339.1497, found: 339.1496.

### 6-(naphthalen-2-yl)-8*H*-indazolo[1,2-*a*]cinnolin-8-one (3n)

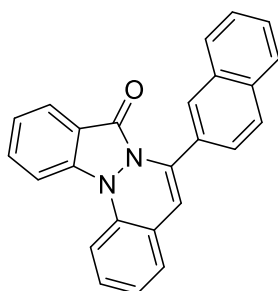

The reaction was performed according to general procedure A with 1-phenyl-1,2-dihydro-3*H*-indazol-3-one **1a** (42.1 mg, 0.2 mmol) and 2-(dimethyl(oxo)- $\lambda^6$ -sulfanylidene)-1-(naphthalen-2-yl)ethan-1-one **2n** (73.9 mg, 0.3 mmol). After purification by silica gel chromatography (petroleum ether/ethyl acetate = 4:1,  $R_f$  = 0.2), the desired product **3n** was obtained as a yellow solid (67.2 mg, 93 % yield). **<sup>1</sup>H NMR** (400 MHz, CDCl<sub>3</sub>)  $\delta$  8.04 (d,  $J$  = 7.8 Hz, 1H), 8.01 (s, 1H), 7.90 – 7.83 (m, 4H), 7.79 – 7.74 (m, 1H), 7.66 (d,  $J$  = 8.4 Hz, 1H), 7.50 (d,  $J$  = 8.2 Hz, 3H), 7.38 (t,  $J$  = 7.4 Hz, 1H), 7.29 – 7.24 (m, 2H), 7.11 (t,  $J$  = 7.4 Hz, 1H), 6.34 (s, 1H). **<sup>13</sup>C NMR** (101 MHz, CDCl<sub>3</sub>)  $\delta$  156.2, 140.1, 138.59, 137.53, 133.72, 133.08, 132.35, 130.11, 129.05, 128.52, 127.83, 127.23, 127.22, 126.99, 126.72, 126.37, 125.79, 124.64, 124.41, 123.49, 123.30, 118.73, 114.38, 113.05, 111.17. **HRMS (ESI)**  $m/z$  calcd. for C<sub>25</sub>H<sub>17</sub>N<sub>2</sub>O<sup>+</sup> [M+H]<sup>+</sup> : 361.1341, found: 361.1345.



### 6-cyclohexyl-8*H*-indazolo[1,2-*a*]cinnolin-8-one (**3o**)

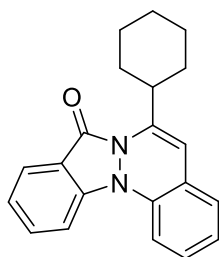

The reaction was performed according to general procedure A with 1-phenyl-1,2-dihydro-3*H*-indazol-3-one **1a** (42.0 mg, 0.2 mmol) and 1-cyclohexyl-2-(dimethyl(oxo)- $\lambda^6$ -sulfanylidene)ethan-1-one **2o** (60.7 mg, 0.3 mmol). After purification by silica gel chromatography (petroleum ether/ethyl acetate = 16:1,  $R_f$  = 0.2), the desired product **3o** was obtained as a yellow solid (47.2 mg, 75 % yield). **<sup>1</sup>H NMR** (400 MHz, CDCl<sub>3</sub>)  $\delta$  8.01 (d,  $J$  = 7.9 Hz, 1H), 7.79 (d,  $J$  = 8.4 Hz, 1H), 7.69 (t,  $J$  = 7.7 Hz, 1H), 7.59 (d,  $J$  = 8.1 Hz, 1H), 7.31 (t,  $J$  = 7.5 Hz, 1H), 7.19 (t,  $J$  = 7.8 Hz, 1H), 7.13 (d,  $J$  = 6.9 Hz, 1H), 7.05 (t,  $J$  = 7.4 Hz, 1H), 5.94 (s, 1H), 3.89 (t,  $J$  = 11.5 Hz, 1H), 2.11 (d,  $J$  = 11.8 Hz, 2H), 1.81 (dd,  $J$  = 18.7, 16.1 Hz, 3H), 1.58 – 1.44 (m, 2H), 1.35 – 1.17 (m, 3H). **<sup>13</sup>C NMR** (101 MHz, CDCl<sub>3</sub>)  $\delta$  156.7, 146.1, 138.5, 136.9, 132.2, 128.0, 126.2, 124.4, 124.2, 123.4, 122.4, 118.0, 113.3, 111.3, 105.3, 36.6, 32.6, 26.5, 26.4. **HRMS (ESI)**  $m/z$  calcd. for C<sub>21</sub>H<sub>21</sub>N<sub>2</sub>O<sup>+</sup> [M+H]<sup>+</sup> : 317.1654, found: 317.1656.

### 2-(2-(8-oxo-8*H*-indazolo[1,2-*a*]cinnolin-6-yl)ethyl)-3a,7a-dihydro-1*H*-isoindole-1,3(2*H*)-dione (**3p**)

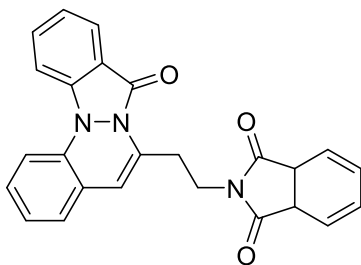

The reaction was performed according to general procedure A with 1-phenyl-1,2-dihydro-3*H*-indazol-3-one **1a** (41.9 mg, 0.2 mmol) and 2-(4-(dimethyl(oxo)- $\lambda^6$ -sulfanylidene)-3-oxobutyl)isoindole-1,3-dione **2p** (88.0 mg, 0.3 mmol). After purification by silica gel chromatography (petroleum ether/ethyl acetate = 3:1,  $R_f$  = 0.2), the desired product **3p** was obtained as a yellow solid (53.6 mg, 65 % yield). **<sup>1</sup>H NMR** (400 MHz, CDCl<sub>3</sub>)  $\delta$  8.00 (d,  $J$  = 7.8 Hz, 1H), 7.80 (d,  $J$  = 8.5 Hz, 1H), 7.74 – 7.68 (m, 3H), 7.64 (dd,  $J$  = 5.3, 3.1 Hz, 2H), 7.58 (d,  $J$  = 8.2 Hz, 1H), 7.30 (t,  $J$  = 7.5 Hz, 1H), 7.18 (t,  $J$  = 7.3 Hz, 1H), 6.96 (t,  $J$  = 7.4 Hz, 1H), 6.91 (d,  $J$  = 6.7 Hz, 1H), 5.70 (s, 1H), 4.17 (t,  $J$  = 6.1 Hz, 2H), 3.48 (t,  $J$  = 6.1 Hz, 2H). **<sup>13</sup>C NMR** (101 MHz, CDCl<sub>3</sub>)  $\delta$  168.3, 156.6, 138.4, 136.9, 136.2, 133.9, 132.4, 132.1, 128.5, 126.0, 124.5, 124.1, 123.3, 122.8, 122.3, 117.4, 113.0, 111.5, 110.1, 37.3, 30.8. **HRMS (ESI)**  $m/z$  calcd. for C<sub>25</sub>H<sub>19</sub>N<sub>3</sub>O<sub>3</sub>Na<sup>+</sup> [M+Na]<sup>+</sup> : 432.1324, found: 432.1322.

#### 4-(8-oxo-8H-indazolo[1,2-a]cinnolin-6-yl)-N,N-dipropylbenzenesulfonamide (**3q**)

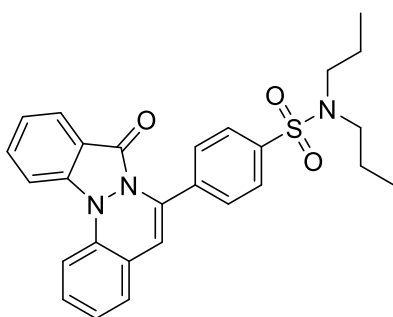

The reaction was performed according to general procedure A with 1-phenyl-1,2-dihydro-3H-indazol-3-one **1a** (42.0 mg, 0.2 mmol) and 4-(2-(dimethyl(oxo)- $\lambda^6$ -sulfanylidene)acetyl)-N,N-dipropylbenzenesulfonamide **2q** (107.9 mg, 0.3 mmol). After purification by silica gel chromatography (petroleum ether/ethyl acetate = 2:1,  $R_f$  = 0.2), the desired product **3q** was obtained as a yellow solid (89.5 mg, 94 % yield).  $^1\text{H NMR}$  (400 MHz,  $\text{CDCl}_3$ )  $\delta$  8.02 (d,  $J$  = 7.8 Hz, 1H), 7.86 (d,  $J$  = 9.8 Hz, 1H), 7.83 (d,  $J$  = 8.6 Hz, 2H), 7.78 (t,  $J$  = 7.7 Hz, 1H), 7.66 (d,  $J$  = 8.2 Hz, 1H), 7.57 (d,  $J$  = 8.2 Hz, 2H), 7.40 (t,  $J$  = 7.5 Hz, 1H), 7.30 (dd,  $J$  = 15.3, 7.5 Hz, 2H), 7.13 (t,  $J$  = 7.5 Hz, 1H), 6.32 (s, 1H), 3.14 – 3.08 (m, 4H), 1.66 – 1.55 (m, 4H), 0.90 (t,  $J$  = 7.4 Hz, 6H).  $^{13}\text{C NMR}$  (101 MHz,  $\text{CDCl}_3$ )  $\delta$  156.1, 140.2, 140.1, 138.6, 136.0, 135.7, 132.6, 129.8, 128.4, 127.7, 126.7, 124.6, 124.5, 123.6, 122.8, 118.4, 114.7, 114.5, 111.3, 50.6, 22.5, 11.3. **HRMS (ESI)**  $m/z$  calcd. for  $\text{C}_{27}\text{H}_{28}\text{N}_3\text{O}_3\text{S}^+$   $[\text{M}+\text{H}]^+$ : 474.1851, found: 474.1856.

#### 6-(1-(6-methoxynaphthalen-2-yl)ethyl)-8H-indazolo[1,2-a]cinnolin-8-one (**3r**)

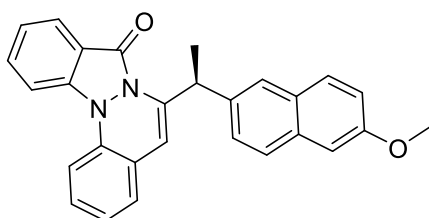

The reaction was performed according to general procedure A with 1-phenyl-1,2-dihydro-3H-indazol-3-one **1a** (42.1 mg, 0.2 mmol) and (S)-1-(dimethyl(oxo)- $\lambda^6$ -sulfanylidene)-3-(6-methoxynaphthalen-2-yl)butan-2-one **2r** (91.3 mg, 0.3 mmol). After purification by silica gel chromatography (petroleum ether/ethyl acetate = 8:1,  $R_f$  = 0.2), the desired product **3r** was obtained as a yellow solid (59.0 mg, 70 % yield).  $^1\text{H NMR}$  (400 MHz,  $\text{CDCl}_3$ )  $\delta$  8.11 (d,  $J$  = 7.9 Hz, 1H), 7.97 (s, 1H), 7.87 (t,  $J$  = 8.3 Hz, 3H), 7.79 (t,  $J$  = 7.8 Hz, 1H), 7.74 (d,  $J$  = 8.2 Hz, 1H), 7.71 (d,  $J$  = 8.6 Hz, 1H), 7.43 – 7.35 (m, 2H), 7.28 (dd,  $J$  = 7.4, 4.3 Hz, 3H), 7.21 (t,  $J$  = 7.4 Hz, 1H), 6.17 (s, 1H), 5.91 (q,  $J$  = 7.0 Hz, 1H), 4.04 (s, 3H), 1.86 (d,  $J$  = 7.1 Hz, 3H).  $^{13}\text{C NMR}$  (101 MHz,  $\text{CDCl}_3$ )  $\delta$  157.5, 156.8, 144.3, 138.8, 138.7, 137.2, 133.6, 132.2, 129.4, 129.0, 128.5, 127.6, 127.1, 126.6, 126.1, 124.3, 124.2, 123.0, 122.5, 118.7, 118.1, 113.4, 111.1, 108.3, 105.6, 55.4, 37.8, 20.8. **HRMS (ESI)**  $m/z$  calcd. for  $\text{C}_{27}\text{H}_{28}\text{N}_3\text{O}_3\text{S}^+$   $[\text{M}+\text{H}]^+$ : 474.1851, found: 474.1856. **HRMS (ESI)**  $m/z$  calcd. for

$C_{28}H_{23}N_2O_2^+$   $[M+H]^+$  : 419.1760, found: 419.1759.

### 6-(1-(4-isobutylphenyl)ethyl)-8*H*-indazolo[1,2-*a*]cinnolin-8-one (3s)

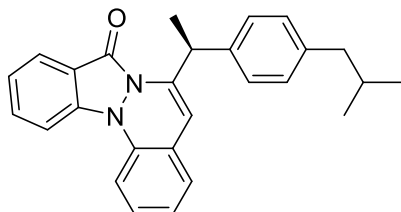

The reaction was performed according to general procedure A with 1-phenyl-1,2-dihydro-3*H*-indazol-3-one **1a** (42.0 mg, 0.2 mmol) and (R)-1-(dimethyl(oxo)- $\lambda^6$ -sulfanylidene)-3-(4-isobutylphenyl)butan-2-one **2s** (44.2 mg, 0.3 mmol). However, this product will be detected by TLC until the temperature rises to 120°C. After purification by silica gel chromatography (petroleum ether/ethyl acetate = 16:1,  $R_f$  = 0.2), the desired product **3s** was obtained as a yellow oil (58.4 mg, 74 % yield).  **$^1H$  NMR** (400 MHz,  $CDCl_3$ )  $\delta$  8.19 (d,  $J$  = 7.9 Hz, 1H), 7.98 (d,  $J$  = 8.4 Hz, 1H), 7.89 (t,  $J$  = 7.7 Hz, 1H), 7.81 (d,  $J$  = 8.1 Hz, 1H), 7.56 (d,  $J$  = 8.0 Hz, 2H), 7.50 (t,  $J$  = 7.5 Hz, 1H), 7.44 (t,  $J$  = 7.8 Hz, 1H), 7.35 (d,  $J$  = 7.4 Hz, 1H), 7.33 – 7.27 (m, 3H), 6.18 (s, 1H), 5.81 (q,  $J$  = 7.0 Hz, 1H), 2.65 (d,  $J$  = 7.2 Hz, 2H), 2.06 (dt,  $J$  = 13.5, 6.7 Hz, 1H), 1.84 (d,  $J$  = 7.1 Hz, 3H), 1.11 (d,  $J$  = 6.6 Hz, 6H).  **$^{13}C$  NMR** (101 MHz,  $CDCl_3$ )  $\delta$  156.8, 144.6, 140.7, 140.1, 138.7, 137.1, 132.1, 129.3, 128.4, 127.8, 126.6, 124.4, 124.2, 123.1, 122.5, 118.1, 113.4, 111.1, 108.1, 45.2, 37.5, 30.2, 22.5, 21.0. **HRMS (ESI)**  $m/z$  calcd. for  $C_{27}H_{27}N_2O^+$   $[M+H]^+$  : 395.2123, found: 395.2123.

### 11-methyl-6-phenyl-8*H*-indazolo[1,2-*a*]cinnolin-8-one (4a)

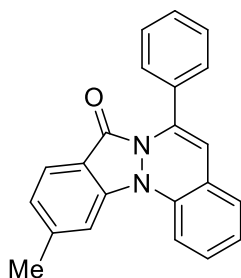

The reaction was performed according to general procedure A with 6-methyl-1-phenyl-1,2-dihydro-3*H*-indazol-3-one **1b** (44.9 mg, 0.2 mmol) and 2-(dimethyl(oxo)- $\lambda^6$ -sulfanylidene)-1-phenylethan-1-one **2a** (58.9 mg, 0.3 mmol). After purification by silica gel chromatography (petroleum ether/ethyl acetate = 4:1,  $R_f$  = 0.2), the desired product **4a** was obtained as a yellow solid (43.0 mg, 66 % yield).  **$^1H$  NMR** (400 MHz,  $CDCl_3$ )  $\delta$  7.88 (d,  $J$  = 8.0 Hz, 1H), 7.65 (d,  $J$  = 8.1 Hz, 1H), 7.63 (s, 1H), 7.48 – 7.39 (m, 5H), 7.30 – 7.26 (m, 1H), 7.24 (s, 1H), 7.19 (d,  $J$  = 8.0 Hz, 1H), 7.10 (t,  $J$  = 7.4 Hz, 1H), 6.22 (s, 1H), 2.62 (s, 3H).  **$^{13}C$  NMR** (101 MHz,  $CDCl_3$ )  $\delta$  156.1, 143.5, 140.7, 138.7, 137.7, 132.3, 129.2, 128.9, 128.0, 128.0, 127.1, 125.0, 124.3, 124.2, 123.7, 116.6, 114.3, 112.5, 111.2, 22.8. **HRMS**

(ESI)  $m/z$  calcd. for  $C_{22}H_{17}N_2O^+$   $[M+H]^+$  : 325.1341, found: 325.1345.

#### 11-methoxy-6-phenyl-8*H*-indazolo[1,2-*a*]cinnolin-8-one (4b)

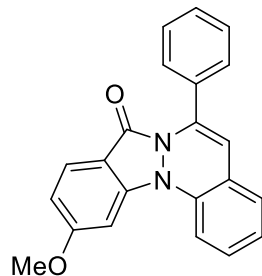

The reaction was performed according to general procedure A with 6-methoxy-1-phenyl-1,2-dihydro-3*H*-indazol-3-one **1c** (48.3 mg, 0.2 mmol) and 2-(dimethyl(oxo)- $\lambda^6$ -sulfanylidene)-1-phenylethan-1-one **2a** (58.9 mg, 0.3 mmol). After purification by silica gel chromatography (petroleum ether/ethyl acetate = 2:1,  $R_f$  = 0.2), the desired product **4b**

was obtained as a yellow solid (55.6 mg, 82 % yield).  $^1H$  NMR (400 MHz,  $CDCl_3$ )  $\delta$  7.93 (d,  $J$  = 8.7 Hz, 1H), 7.67 (d,  $J$  = 8.1 Hz, 1H), 7.48 (d,  $J$  = 9.5 Hz, 5H), 7.28 (dd,  $J$  = 11.4, 5.4 Hz, 3H), 7.14 (t,  $J$  = 7.4 Hz, 1H), 7.00 (d,  $J$  = 8.7 Hz, 1H), 6.21 (s, 1H), 4.02 (s, 3H).  $^{13}C$  NMR (101 MHz,  $CDCl_3$ )  $\delta$  163.7, 155.9, 141.7, 138.4, 137.9, 132.3, 129.1, 128.7, 128.0, 128.0, 127.1, 125.7, 124.4, 123.9, 112.2, 112.1, 112.0, 110.9, 98.0, 56.1. HRMS (ESI)  $m/z$  calcd. for  $C_{22}H_{17}N_2O_2^+$   $[M+H]^+$  : 341.1290, found: 341.1294.

#### 11-fluoro-6-phenyl-8*H*-indazolo[1,2-*a*]cinnolin-8-one (4c)

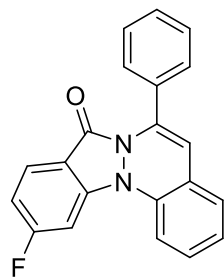

The reaction was performed according to general procedure A with 6-fluoro-1-phenyl-1,2-dihydro-3*H*-indazol-3-one **1d** (45.8 mg, 0.2 mmol) and 2-(dimethyl(oxo)- $\lambda^6$ -sulfanylidene)-1-phenylethan-1-one **2a** (58.9 mg, 0.3 mmol). After purification by silica gel chromatography (petroleum ether/ethyl acetate = 4:1,  $R_f$  = 0.2), the desired product **4c** was obtained as a

yellow solid (64.1 mg, 98 % yield).  $^1H$  NMR (400 MHz,  $CDCl_3$ )  $\delta$  7.98 (dd,  $J$  = 8.4, 5.7 Hz, 1H), 7.57 (d,  $J$  = 8.1 Hz, 1H), 7.51 (d,  $J$  = 9.5 Hz, 1H), 7.43 (s, 5H), 7.32 – 7.27 (m, 1H), 7.25 (d,  $J$  = 5.5 Hz, 1H), 7.16 – 7.11 (m, 1H), 7.11 – 7.05 (m, 1H), 6.20 (s, 1H).  $^{13}C$  NMR (101 MHz,  $CDCl_3$ )  $\delta$  166.9, 164.4, 155.3, 140.5, 140.3, 137.8, 137.6, 132.0, 129.3, 129.0, 128.0, 127.3, 126.7, 126.6, 124.8, 123.5, 114.9, 112.4, 112.2, 111.9, 111.0, 101.3, 101.0.  $^{19}F$  NMR (376 MHz,  $CDCl_3$ )  $\delta$  -104.51. HRMS (ESI)  $m/z$  calcd. for  $C_{21}H_{14}FN_2O^+$   $[M+H]^+$  : 329.1090, found: 329.1093.

#### 10-chloro-6-phenyl-8*H*-indazolo[1,2-*a*]cinnolin-8-one (**4d**)

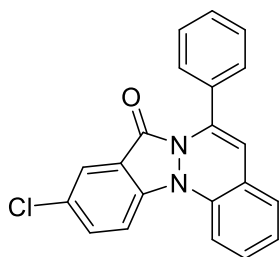

The reaction was performed according to general procedure A with 5-chloro-1-phenyl-1,2-dihydro-3*H*-indazol-3-one **1e** (48.9 mg, 0.2 mmol) and 2-(dimethyl(oxo)- $\lambda^6$ -sulfanylidene)-1-phenylethan-1-one **2a** (58.9 mg, 0.3 mmol). After purification by silica gel chromatography (petroleum ether/ethyl acetate = 8:1,  $R_f$  = 0.2), the desired product **4d** was obtained as a yellow solid (43.6 mg, 63 % yield). **<sup>1</sup>H NMR** (400 MHz, CDCl<sub>3</sub>)  $\delta$  7.96 (d,  $J$  = 2.1 Hz, 1H), 7.80 (d,  $J$  = 8.8 Hz, 1H), 7.70 (dd,  $J$  = 8.8, 2.1 Hz, 1H), 7.57 (d,  $J$  = 8.1 Hz, 1H), 7.43 (s, 5H), 7.29 (s, 1H), 7.27 (s, 1H), 7.13 (t,  $J$  = 7.5 Hz, 1H), 6.26 (s, 1H). **<sup>13</sup>C NMR** (101 MHz, CDCl<sub>3</sub>)  $\delta$  154.8, 138.2, 138.1, 137.4, 132.6, 131.9, 129.4, 129.2, 128.9, 128.1, 128.0, 127.4, 124.7, 124.1, 123.3, 120.0, 115.6, 113.0, 111.2. **HRMS (ESI)**  $m/z$  calcd. for C<sub>21</sub>H<sub>14</sub>ClN<sub>2</sub>O<sup>+</sup> [M+H]<sup>+</sup> : 345.1090, found: 345.1093.

#### 10-bromo-6-phenyl-8*H*-indazolo[1,2-*a*]cinnolin-8-one (**4e**)

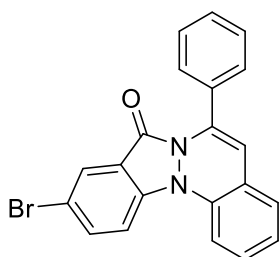

The reaction was performed according to general procedure A with 5-bromo-1-phenyl-1,2-dihydro-3*H*-indazol-3-one **1f** (57.8 mg, 0.2 mmol) and 2-(dimethyl(oxo)- $\lambda^6$ -sulfanylidene)-1-phenylethan-1-one **2a** (58.9 mg, 0.3 mmol). After purification by silica gel chromatography (petroleum ether/ethyl acetate = 8:1,  $R_f$  = 0.2), the desired product **4e** was obtained as a yellow solid (40.6 mg, 52 % yield). **<sup>1</sup>H NMR** (400 MHz, CDCl<sub>3</sub>)  $\delta$  8.07 (d,  $J$  = 1.1 Hz, 1H), 7.78 (dd,  $J$  = 8.8, 1.1 Hz, 1H), 7.69 (d,  $J$  = 8.8 Hz, 1H), 7.52 (d,  $J$  = 8.1 Hz, 1H), 7.39 (s, 5H), 7.23 (d,  $J$  = 7.2 Hz, 2H), 7.09 (t,  $J$  = 7.5 Hz, 1H), 6.20 (s, 1H). **<sup>13</sup>C NMR** (101 MHz, CDCl<sub>3</sub>)  $\delta$  154.5, 138.4, 137.9, 137.3, 135.2, 131.8, 129.3, 129.2, 128.0, 127.9, 127.4, 127.2, 124.7, 123.2, 120.3, 116.0, 115.8, 112.9, 111.1. **HRMS (ESI)**  $m/z$  calcd. for C<sub>21</sub>H<sub>14</sub>BrN<sub>2</sub>O<sup>+</sup> [M+H]<sup>+</sup> : 389.0290, found: 389.0285.

#### 6-phenyl-10-(trifluoromethyl)-8*H*-indazolo[1,2-*a*]cinnolin-8-one (**4f**)

The reaction was performed according to general procedure A with 1-phenyl-5-(trifluoromethyl)-1,2-dihydro-3*H*-indazol-3-one **1g** (55.5 mg, 0.2 mmol) and 2-(dimethyl(oxo)- $\lambda^6$ -sulfanylidene)-1-phenylethan-1-one **2a** (58.9 mg, 0.3 mmol). After

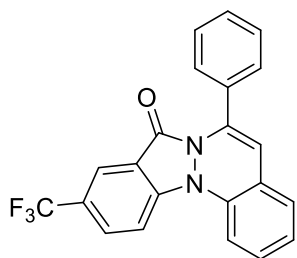

purification by silica gel chromatography (petroleum ether/ethyl acetate = 8:1,  $R_f$  = 0.2), the desired product **4f** was obtained as a yellow solid (48.5 mg, 64 % yield).  $^1\text{H NMR}$  (400 MHz,  $\text{CDCl}_3$ )  $\delta$  8.31 (s, 1H), 7.97 (s, 2H), 7.65 (d,  $J$  = 8.1 Hz, 1H), 7.44 (s, 5H), 7.34 – 7.30 (m, 1H), 7.29 (d,  $J$  = 6.3 Hz, 1H), 7.17 (t,  $J$  = 7.5 Hz, 1H), 6.25

(s, 1H).  $^{13}\text{C NMR}$  (101 MHz,  $\text{CDCl}_3$ )  $\delta$  154.93, 140.69, 137.39 (d,  $J$  = 8.2 Hz), 131.75, 129.45, 129.24, 129.00 (dd,  $J$  = 6.4, 3.2 Hz), 128.07, 127.51, 125.41 (d,  $J$  = 5.1 Hz), 125.14, 125.12 (d,  $J$  = 4.1 Hz), 123.30, 122.62 (dd,  $J$  = 8.0, 3.8 Hz), 118.19, 114.44, 112.69, 111.40.  $^{19}\text{F NMR}$  (376 MHz,  $\text{CDCl}_3$ )  $\delta$  -61.54. **HRMS (ESI)**  $m/z$  calcd. for  $\text{C}_{22}\text{H}_{14}\text{F}_3\text{N}_2\text{O}^+$   $[\text{M}+\text{H}]^+$  : 379.1058, found: 379.1060.

#### 10-nitro-6-phenyl-8H-indazolo[1,2-a]cinnolin-8-one (4g)

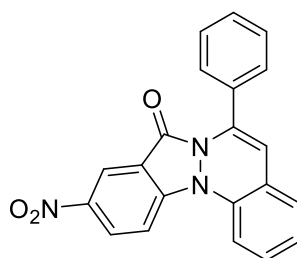

The reaction was performed according to general procedure A with 5-nitro-1-phenyl-1,2-dihydro-3H-indazol-3-one **1h** (51.0 mg, 0.2 mmol) and 2-(dimethyl(oxo)- $\lambda^6$ -sulfanylidene)-1-phenylethan-1-one **2a** (58.9 mg, 0.3 mmol). After purification by silica gel chromatography (petroleum ether/ethyl acetate = 4:1,  $R_f$  = 0.2), the

desired product **4g** was obtained as a red solid (35.7 mg, 50 % yield).  $^1\text{H NMR}$  (400 MHz,  $\text{CDCl}_3$ )  $\delta$  8.92 (d,  $J$  = 1.9 Hz, 1H), 8.61 (dd,  $J$  = 9.2, 1.9 Hz, 1H), 7.98 (d,  $J$  = 9.2 Hz, 1H), 7.70 (d,  $J$  = 8.2 Hz, 1H), 7.45 (s, 5H), 7.37 (t,  $J$  = 8.0 Hz, 1H), 7.33 (d,  $J$  = 7.3 Hz, 1H), 7.23 (t,  $J$  = 7.5 Hz, 1H), 6.22 (s, 1H).  $^{13}\text{C NMR}$  (101 MHz,  $\text{CDCl}_3$ )  $\delta$  154.4, 142.7, 140.7, 137.4, 136.3, 131.6, 129.6, 129.4, 128.2, 128.1, 127.7, 127.3, 125.9, 123.3, 121.9, 117.8, 113.6, 112.3, 111.9. **HRMS (ESI)**  $m/z$  calcd. for  $\text{C}_{21}\text{H}_{14}\text{N}_3\text{O}_3^+$   $[\text{M}+\text{H}]^+$  : 356.1035, found: 356.1040.

#### 10,11-difluoro-6-phenyl-8H-indazolo[1,2-a]cinnolin-8-one (4h)

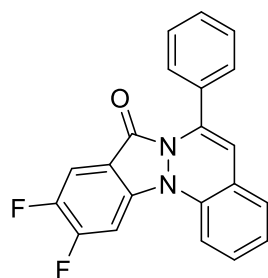

The reaction was performed according to general procedure A with 5,6-difluoro-1-phenyl-1,2-dihydro-3H-indazol-3-one **1i** (49.2 mg, 0.2 mmol) and 2-(dimethyl(oxo)- $\lambda^6$ -sulfanylidene)-1-phenylethan-1-one **2a** (58.9 mg, 0.3 mmol). After purification by silica gel chromatography

(petroleum ether/ethyl acetate = 8:1,  $R_f$  = 0.2), the desired product **4h** was obtained as a yellow solid (51.7 mg, 75% yield).  $^1\text{H NMR}$  (400 MHz,  $\text{CDCl}_3$ )  $\delta$  7.76 (t,  $J$  = 8.2 Hz, 1H), 7.67 (dd,  $J$  = 10.0, 6.0 Hz, 1H), 7.52 (d,  $J$  = 8.1 Hz, 1H), 7.44 (s, 5H), 7.33 – 7.26 (m, 2H), 7.16 (t,  $J$  = 7.5 Hz, 1H), 6.25 (s, 1H);  $^{13}\text{C NMR}$  (101 MHz,  $\text{CDCl}_3$ )  $\delta$  154.8, 154.8, 149.1, 148.9, 146.6, 146.5, 137.8, 137.4, 135.8, 135.7, 131.8, 129.4, 129.2, 128.1, 128.0, 127.5, 125.0, 123.3, 114.5, 114.5, 114.4, 114.4, 112.8, 112.0, 112.0, 111.8, 111.8, 110.8, 103.5, 103.2.(extra signals due to C–F coupling);  $^{19}\text{F NMR}$  (376 MHz,  $\text{CDCl}_3$ )  $\delta$  -126.66, -140.23. **HRMS (ESI)**  $m/z$  calcd. for  $\text{C}_{21}\text{H}_{13}\text{F}_2\text{N}_2\text{O}^+$   $[\text{M}+\text{H}]^+$  : 347.0996, found: 347.0995.

#### 11-bromo-10-fluoro-6-phenyl-8H-indazolo[1,2-a]cinnolin-8-one (4i)

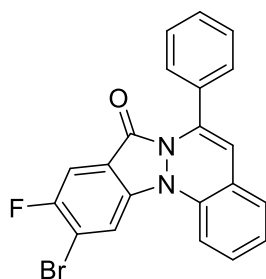

The reaction was performed according to general procedure A with 6-bromo-5-fluoro-1-phenyl-1,2-dihydro-3H-indazol-3-one **1j** (61.4 mg, 0.2 mmol) and 2-(dimethyl(oxo)- $\lambda^6$ -sulfanylidene)-1-phenylethan-1-one **2a** (58.9 mg, 0.3 mmol). After purification by silica gel chromatography (petroleum ether/ethyl acetate = 8:1,  $R_f$  = 0.2), the desired product **4i** was obtained as a yellow solid (57.0 mg, 70 % yield).  $^1\text{H NMR}$  (400 MHz,  $\text{CDCl}_3$ )  $\delta$  8.07 (d,  $J$  = 5.0 Hz, 1H), 7.69 (d,  $J$  = 6.9 Hz, 1H), 7.52 (d,  $J$  = 8.1 Hz, 1H), 7.43 (s, 5H), 7.31 (t,  $J$  = 7.9 Hz, 1H), 7.27 (d,  $J$  = 7.8 Hz, 1H), 7.14 (t,  $J$  = 7.5 Hz, 1H), 6.26 (s, 1H).  $^{13}\text{C NMR}$  (101 MHz,  $\text{CDCl}_3$ )  $\delta$  156.5, 154.7, 154.7 (d,  $J$  = 3.8 Hz), 154.7, 154.0, 137.9, 137.3, 136.4, 131.7, 129.4, 129.4 (d,  $J$  = 10.8 Hz), 129.3, 128.1, 127.9, 127.5, 124.9, 123.2, 119.2, 119.0 (d,  $J$  = 7.9 Hz), 115.4 (d,  $J$  = 24.3 Hz), 115.5, 115.3, 113.1, 110.9, 110.6, 110.5 (d,  $J$  = 25.2 Hz), 110.3, 77.5, 77.2, 76.8.  $^{19}\text{F NMR}$  (376 MHz,  $\text{CDCl}_3$ )  $\delta$  -111.57. **HRMS (ESI)**  $m/z$  calcd. for  $\text{C}_{21}\text{H}_{13}\text{BrFN}_2\text{O}^+$   $[\text{M}+\text{H}]^+$  : 407.0195, found: 407.0190.

#### 3-methyl-6-phenyl-8H-indazolo[1,2-a]cinnolin-8-one (4j)

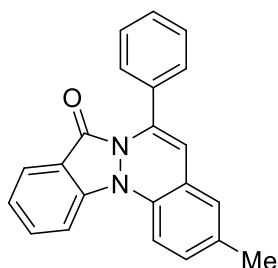

The reaction was performed according to general procedure A with 1-(p-tolyl)-1,2-dihydro-3H-indazol-3-one **1k** (44.7 mg, 0.2 mmol) and 2-(dimethyl(oxo)- $\lambda^6$ -sulfanylidene)-1-phenylethan-1-one **2a** (58.9 mg, 0.3 mmol). After purification by silica gel chromatography (petroleum

ether/ethyl acetate = 8:1,  $R_f = 0.2$ ), the desired product **4j** was obtained as a yellow solid (33.1 mg, 51 % yield). **<sup>1</sup>H NMR** (400 MHz,  $\text{CDCl}_3$ )  $\delta$  8.01 (d,  $J = 7.8$  Hz, 1H), 7.81 (d,  $J = 8.4$  Hz, 1H), 7.73 (t,  $J = 7.7$  Hz, 1H), 7.52 (d,  $J = 8.8$  Hz, 1H), 7.44 (d,  $J = 5.3$  Hz, 5H), 7.35 (t,  $J = 7.4$  Hz, 1H), 7.05 (s, 2H), 6.19 (s, 1H), 2.32 (s, 3H). **<sup>13</sup>C NMR** (101 MHz,  $\text{CDCl}_3$ )  $\delta$  156.0, 140.1, 137.3, 136.2, 133.9, 132.2, 132.2, 129.3, 129.1, 128.0, 127.9, 127.7, 124.5, 123.2, 123.0, 118.5, 114.2, 112.9, 111.0, 20.7. **HRMS (ESI)**  $m/z$  calcd. for  $\text{C}_{22}\text{H}_{17}\text{N}_2\text{O}^+$   $[\text{M}+\text{H}]^+$  : 325.1341, found: 325.1341.

#### 6-phenyl-3-(trifluoromethyl)-8H-indazolo[1,2-a]cinnolin-8-one (**4k**)

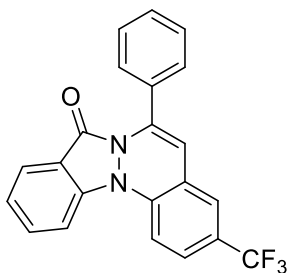

The reaction was performed according to general procedure A with 1-(4-(trifluoromethyl)phenyl)-1,2-dihydro-3H-indazol-3-one **1l** (55.6 mg, 0.2 mmol) and 2-(dimethyl(oxo)- $\lambda^6$ -sulfanylidene)-1-phenylethan-1-one **2a** (58.9 mg, 0.3 mmol). After purification by silica gel chromatography (petroleum ether/ethyl acetate = 8:1,  $R_f = 0.2$ ), the desired product **4k** was obtained as a yellow solid (69.6 mg, 92 % yield). **<sup>1</sup>H NMR** (400 MHz,  $\text{CDCl}_3$ )  $\delta$  8.02 (d,  $J = 7.8$  Hz, 1H), 7.83 (d,  $J = 8.4$  Hz, 1H), 7.82 – 7.77 (m, 1H), 7.69 (d,  $J = 8.5$  Hz, 1H), 7.49 (d,  $J = 8.8$  Hz, 1H), 7.44 (s, 6H), 7.41 (d,  $J = 7.7$  Hz, 1H), 6.21 (s, 1H). **<sup>13</sup>C NMR** (101 MHz,  $\text{CDCl}_3$ )  $\delta$  155.9, 140.9, 139.8, 139.0, 132.8, 131.6, 129.6, 128.1, 128.0, 126.6, 126.2, 126.0, 126.0, 125.9, 125.9, 125.2, 124.8, 124.1, 123.9, 123.8, 123.8, 123.7, 122.5, 119.0, 114.3, 111.4, 111.2. **<sup>19</sup>F NMR** (376 MHz,  $\text{CDCl}_3$ )  $\delta$  -62.38. **HRMS (ESI)**  $m/z$  calcd. for  $\text{C}_{22}\text{H}_{14}\text{F}_3\text{N}_2\text{O}^+$   $[\text{M}+\text{H}]^+$  : 379.1058, found: 379.1057.

#### 2,3-dimethyl-6-phenyl-8H-indazolo[1,2-a]cinnolin-8-one (**4l**)

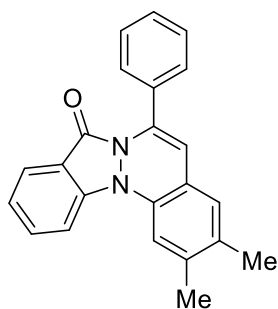

The reaction was performed according to general procedure A with 1-(3,4-dimethylphenyl)-1,2-dihydro-3H-indazol-3-one **1m** (47.7 mg, 0.2 mmol) and 2-(dimethyl(oxo)- $\lambda^6$ -sulfanylidene)-1-phenylethan-1-one **2a** (58.9 mg, 0.3 mmol). After purification by silica gel chromatography (petroleum ether/ethyl acetate = 8:1,  $R_f = 0.2$ ), the desired product **4l** was obtained as a yellow solid (66.1 mg, 98 % yield). **<sup>1</sup>H NMR** (400 MHz,  $\text{CDCl}_3$ )  $\delta$  8.01 (d,  $J = 7.8$  Hz, 1H), 7.85 (d,  $J = 8.4$  Hz, 1H), 7.75 (t,  $J = 7.7$  Hz, 1H), 7.42 (dt,  $J = 7.1, 4.3$  Hz, 6H), 7.36 (t,  $J$



= 7.5 Hz, 1H), 7.02 (s, 1H), 6.21 (s, 1H), 2.31 (s, 3H), 2.24 (s, 3H).  $^{13}\text{C}$  NMR (101 MHz,  $\text{CDCl}_3$ )  $\delta$  156.0, 140.1, 137.8, 136.5, 132.5, 132.4, 132.1, 128.9, 128.3, 128.0, 127.9, 124.5, 122.9, 120.8, 118.6, 114.3, 112.9, 112.3, 20.5, 19.1. **HRMS (ESI)**  $m/z$  calcd. for  $\text{C}_{23}\text{H}_{19}\text{N}_2\text{O}^+$   $[\text{M}+\text{H}]^+$  : 339.1497, found: 339.1499.

#### 2-chloro-3-methyl-6-phenyl-8H-indazolo[1,2-a]cinnolin-8-one (4m)

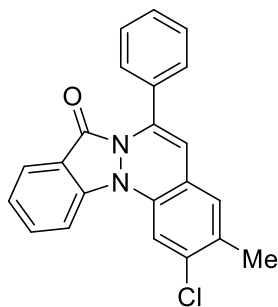

The reaction was performed according to general procedure A with 1-(3-chloro-4-methylphenyl)-1,2-dihydro-3H-indazol-3-one **1n** (51.9 mg, 0.2 mmol) and 2-(dimethyl(oxo)- $\lambda^6$ -sulfanylidene)-1-phenylethan-1-one **2a** (58.9 mg, 0.3 mmol). After purification by silica gel chromatography (petroleum ether/ethyl acetate = 8:1,  $R_f$  = 0.2), the desired product **4m** was obtained as a yellow oil (57.0 mg, 79 % yield).  $^1\text{H}$  NMR (400 MHz,  $\text{CDCl}_3$ )  $\delta$  8.01 (d,  $J$  = 7.9 Hz, 1H), 7.77 (d,  $J$  = 3.8 Hz, 2H), 7.56 (s, 1H), 7.41 (s, 5H), 7.38 (dd,  $J$  = 7.9, 4.0 Hz, 2H), 7.03 (s, 1H), 6.13 (s, 1H), 2.30 (s, 3H).  $^{13}\text{C}$  NMR (101 MHz,  $\text{CDCl}_3$ )  $\delta$  156.0, 140.0, 137.6, 137.3, 134.0, 132.6, 131.9, 131.8, 129.2, 129.0, 128.0, 127.9, 124.6, 123.6, 122.1, 118.8, 114.2, 111.9, 111.8, 19.4. **HRMS (ESI)**  $m/z$  calcd. for  $\text{C}_{22}\text{H}_{16}\text{ClN}_2\text{O}^+$   $[\text{M}+\text{H}]^+$  : 359.0951, found: 359.0952.

#### 2,3-dichloro-6-phenyl-8H-indazolo[1,2-a]cinnolin-8-one (4n)

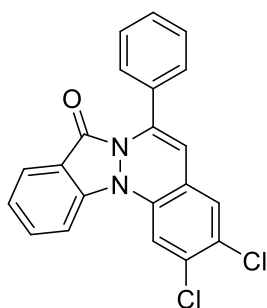

The reaction was performed according to general procedure A with 1-(3,4-dichlorophenyl)-1,2-dihydro-3H-indazol-3-one **1o** (56.2 mg, 0.2 mmol) and 2-(dimethyl(oxo)- $\lambda^6$ -sulfanylidene)-1-phenylethan-1-one **2a** (58.9 mg, 0.3 mmol). After purification by silica gel chromatography (petroleum ether/ethyl acetate = 8:1,  $R_f$  = 0.2), the desired product **4n** was obtained as a yellow oil (45.2 mg, 60 % yield).  $^1\text{H}$  NMR (400 MHz,  $\text{CDCl}_3$ )  $\delta$  8.02 (d,  $J$  = 7.8 Hz, 1H), 7.84 – 7.79 (m, 1H), 7.77 (d,  $J$  = 8.2 Hz, 1H), 7.65 (s, 1H), 7.43 (s, 6H), 7.26 (s, 1H), 6.11 (s, 1H).  $^{13}\text{C}$  NMR (101 MHz,  $\text{CDCl}_3$ )  $\delta$  156.1, 140.0, 139.0, 137.8, 133.0, 131.9, 131.5, 129.7, 128.2, 128.0, 127.8, 127.7, 124.9, 124.1, 123.9, 119.0, 114.2, 113.0, 110.6. **HRMS (ESI)**  $m/z$  calcd. for  $\text{C}_{21}\text{H}_{13}\text{Cl}_2\text{N}_2\text{O}^+$   $[\text{M}+\text{H}]^+$  : 379.0405, found: 379.0407.

#### 6-phenyl-8H-thieno[2',3':4,5]pyrazolo[1,2-a]cinnolin-8-one (4o)

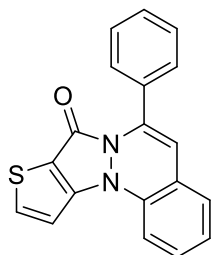

The reaction was performed according to general procedure A with 1-phenyl-1,2-dihydro-3H-thieno[3,2-c]pyrazol-3-one **1p** (43.2 mg, 0.2 mmol) and 2-(dimethyl(oxo)- $\lambda^6$ -sulfanylidene)-1-phenylethan-1-one **2a** (58.9 mg, 0.3 mmol). After purification by silica gel chromatography (petroleum ether/ethyl acetate = 4:1,  $R_f$  = 0.2), the desired product **4o** was obtained as a yellow oil (48.3 mg, 76 % yield).  $^1\text{H NMR}$  (400 MHz, DMSO)  $\delta$  8.28 (d,  $J$  = 5.2 Hz, 1H), 7.93 (d,  $J$  = 5.3 Hz, 1H), 7.64 (d,  $J$  = 8.2 Hz, 1H), 7.45 – 7.34 (m, 7H), 7.16 (t,  $J$  = 7.5 Hz, 1H), 6.41 (s, 1H).  $^{13}\text{C NMR}$  (101 MHz, DMSO)  $\delta$  151.9, 146.3, 138.7, 136.2, 136.0, 132.2, 129.6, 128.7, 127.7, 127.6, 127.4, 124.3, 121.1, 114.8, 112.9, 111.8, 111.3. **HRMS (ESI)**  $m/z$  calcd. for  $\text{C}_{19}\text{H}_{13}\text{N}_2\text{OS}^+$   $[\text{M}+\text{H}]^+$  : 317.0749, found: 317.0750.

#### 6-hydroxy-6-phenyl-8H-indazolo[1,2-a]cinnoline-5,8(6H)-dione (5a)

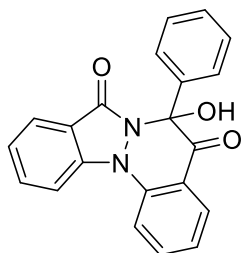

The reaction was performed according to general procedure B with 1-phenyl-1,2-dihydro-3H-indazol-3-one **1a** (42.0 mg, 0.2 mmol) and 2-(dimethyl(oxo)- $\lambda^6$ -sulfanylidene)-1-phenylethan-1-one **2a** (58.9 mg, 0.3 mmol). After purification by silica gel chromatography (petroleum ether/ethyl acetate = 2:1,  $R_f$  = 0.2), the desired product **5a** was obtained as a yellow solid (52.4 mg, 77% yield).  $^1\text{H NMR}$  (400 MHz,  $\text{CDCl}_3$ )  $\delta$  8.02 (d,  $J$  = 7.8 Hz, 1H), 7.95 (d,  $J$  = 7.7 Hz, 1H), 7.88 (d,  $J$  = 8.4 Hz, 1H), 7.82 (d,  $J$  = 8.4 Hz, 1H), 7.75 (t,  $J$  = 7.6 Hz, 1H), 7.66 (t,  $J$  = 7.7 Hz, 1H), 7.37 – 7.21 (m, 6H), 7.15 (t,  $J$  = 7.2 Hz, 1H), 6.95 (s, 1H).  $^{13}\text{C NMR}$  (101 MHz,  $\text{CDCl}_3$ )  $\delta$  185.6, 164.5, 141.1, 139.7, 138.3, 136.4, 134.3, 130.3, 129.7, 129.1, 125.7, 125.1, 123.7, 117.9, 117.3, 113.1, 112.9, 91.4. **HRMS (ESI)**  $m/z$  calcd. for  $\text{C}_{21}\text{H}_{15}\text{N}_2\text{O}_3^+$   $[\text{M}+\text{H}]^+$  : 343.1083, found: 343.1076.

#### 6-(4-bromophenyl)-6-hydroxy-8H-indazolo[1,2-a]cinnoline-5,8(6H)-dione (5b)

The reaction was performed according to general procedure B with 1-phenyl-1,2-dihydro-3H-indazol-3-one **1a** (42.0 mg, 0.2 mmol) and 1-(4-bromophenyl)-2-(dimethyl(oxo)- $\lambda^6$ -sulfanylidene)ethan-1-one **2e** (76.3 mg, 0.3 mmol). After purification by silica gel chromatography (petroleum ether/ethyl acetate = 2:1,  $R_f$  = 0.2), the

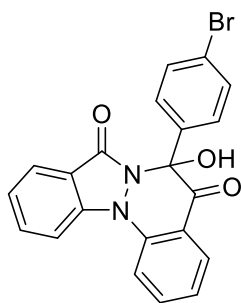

desired product **5b** was obtained as a yellow oil (25.3 mg, 30% yield).  $^1\text{H}$  NMR (400 MHz,  $\text{CDCl}_3$ )  $\delta$  8.09 – 8.04 (m, 1H), 7.98 (d,  $J = 7.8$  Hz, 1H), 7.91 (d,  $J = 8.5$  Hz, 1H), 7.86 (d,  $J = 8.5$  Hz, 1H), 7.79 (t,  $J = 7.7$  Hz, 1H), 7.74 – 7.69 (m, 1H), 7.42 (d,  $J = 8.6$  Hz, 2H), 7.37 (t,  $J = 7.5$  Hz, 1H), 7.27 (d,  $J = 7.9$  Hz, 2H), 7.22 (t,  $J = 7.6$  Hz, 1H), 6.87 (s, 1H).  $^{13}\text{C}$  NMR (101 MHz,  $\text{CDCl}_3$ )  $\delta$  185.3, 164.5, 141.3, 139.9, 137.5, 136.6, 134.4, 132.2, 130.4, 127.5, 125.2, 124.2, 123.9, 123.9, 117.9, 117.3, 113.2, 112.9, 90.8. HRMS (ESI)  $m/z$  calcd. for  $\text{C}_{21}\text{H}_{14}\text{BrN}_2\text{O}_3^+$   $[\text{M}+\text{H}]^+$  : 421.0188, found: 421.0190.

#### 6-hydroxy-6-(4-(trifluoromethyl)phenyl)-8H-indazolo[1,2-a]cinnoline-5,8(6H)-dione (**5c**)

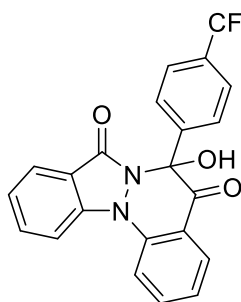

The reaction was performed according to general procedure B with 1-phenyl-1,2-dihydro-3H-indazol-3-one **1a** (41.9 mg, 0.2 mmol) and 2-(dimethyl(oxo)- $\lambda^6$ -sulfanylidene)-1-(4-(trifluoromethyl)phenyl)ethan-1-one **2f** (79.3 mg, 0.3 mmol). After purification by silica gel chromatography (petroleum ether/ethyl acetate = 2:1,  $R_f = 0.2$ ), the desired product **5c** was obtained as a yellow oil (27.9 mg, 34% yield).  $^1\text{H}$  NMR (400 MHz,  $\text{CDCl}_3$ )  $\delta$  8.05 (d,  $J = 7.8$  Hz, 1H), 7.97 (d,  $J = 7.8$  Hz, 1H), 7.92 (d,  $J = 8.6$  Hz, 1H), 7.88 (d,  $J = 8.5$  Hz, 1H), 7.80 (t,  $J = 8.0$  Hz, 1H), 7.73 (t,  $J = 7.4$  Hz, 1H), 7.59 – 7.53 (m, 4H), 7.37 (t,  $J = 7.5$  Hz, 1H), 7.23 (t,  $J = 7.6$  Hz, 1H), 6.86 (s, 1H).  $^{13}\text{C}$  NMR (101 MHz,  $\text{CDCl}_3$ )  $\delta$  185.24, 164.48, 142.25, 141.47, 139.98, 136.76, 136.09, 134.54, 130.47, 126.95, 126.36, 126.05 (dd), 125.21, 123.99 (d), 123.86, 122.46, 117.55 (d), 113.08 (d), 110.70, 90.55.  $^{19}\text{F}$  NMR (376 MHz,  $\text{CDCl}_3$ )  $\delta$  -62.88. HRMS (ESI)  $m/z$  calcd. for  $\text{C}_{22}\text{H}_{14}\text{F}_3\text{N}_2\text{O}_3^+$   $[\text{M}+\text{H}]^+$  : 411.0957, found: 411.0954.

#### 6-hydroxy-6-(3-methoxyphenyl)-8H-indazolo[1,2-a]cinnoline-5,8(6H)-dione (**5d**)

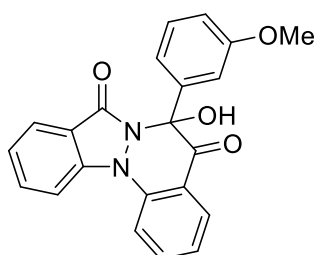

The reaction was performed according to general procedure B with 1-phenyl-1,2-dihydro-3H-indazol-3-one **1a** (42.0 mg, 0.2 mmol) and 2-(dimethyl(oxo)- $\lambda^6$ -sulfanylidene)-1-(3-methoxyphenyl)ethan-1-one **2i** (67.9 mg, 0.3 mmol). After

purification by silica gel chromatography (petroleum ether/ethyl acetate = 2:1,  $R_f = 0.2$ ), the desired product **5d** was obtained as a yellow oil (36.3 mg, 49% yield).  $^1\text{H NMR}$  (400 MHz,  $\text{CDCl}_3$ )  $\delta$  8.04 (d,  $J = 7.9$  Hz, 1H), 7.97 (d,  $J = 7.9$  Hz, 1H), 7.90 (d,  $J = 8.6$  Hz, 1H), 7.84 (d,  $J = 8.5$  Hz, 1H), 7.77 (t,  $J = 7.9$  Hz, 1H), 7.69 (t,  $J = 7.8$  Hz, 1H), 7.34 (t,  $J = 7.5$  Hz, 1H), 7.17 (dt,  $J = 12.0, 7.8$  Hz, 2H), 7.03 (s, 1H), 6.99 (s, 1H), 6.82 (dd,  $J = 11.1, 5.0$  Hz, 2H), 3.72 (s, 3H).  $^{13}\text{C NMR}$  (101 MHz,  $\text{CDCl}_3$ )  $\delta$  185.4, 164.4, 160.1, 141.0, 139.9, 139.6, 136.4, 134.3, 130.3, 130.0, 125.0, 123.7, 123.6, 117.9, 117.6, 117.2, 115.4, 113.0, 112.9, 111.5, 91.2, 55.4. **HRMS (ESI)**  $m/z$  calcd. for  $\text{C}_{22}\text{H}_{17}\text{N}_2\text{O}_4^+$   $[\text{M}+\text{H}]^+$  : 373.1188, found: 373.1180.

#### 6-(2-chlorophenyl)-6-hydroxy-8H-indazolo[1,2-a]cinnoline-5,8(6H)-dione (**5e**)

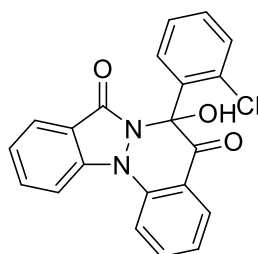

The reaction was performed according to general procedure B with 1-phenyl-1,2-dihydro-3H-indazol-3-one **1a** (41.9 mg, 0.2 mmol) and 1-(2-chlorophenyl)-2-(dimethyl(oxo)- $\lambda^6$ -sulfanylidene)ethan-1-one **2k** (69.2 mg, 0.3 mmol). After purification by silica gel chromatography (petroleum ether/ethyl acetate = 2:1,  $R_f = 0.2$ ), the desired product **5e**

was obtained as a yellow oil (21.4 mg, 28% yield).  $^1\text{H NMR}$  (400 MHz,  $\text{CDCl}_3$ )  $\delta$  8.15 (d,  $J = 7.8$  Hz, 1H), 7.96 (d,  $J = 7.7$  Hz, 1H), 7.81 (d,  $J = 8.5$  Hz, 1H), 7.76 – 7.67 (m, 3H), 7.59 (t,  $J = 7.8$  Hz, 1H), 7.46 (t,  $J = 7.5$  Hz, 1H), 7.40 (t,  $J = 7.6$  Hz, 1H), 7.34 (d,  $J = 7.7$  Hz, 1H), 7.24 (d,  $J = 13.9$  Hz, 1H), 7.14 (t,  $J = 7.5$  Hz, 1H), 6.22 (s, 1H).  $^{13}\text{C NMR}$  (101 MHz,  $\text{CDCl}_3$ )  $\delta$  185.3, 162.3, 141.2, 139.9, 136.1, 135.5, 133.9, 131.2, 130.4, 130.2, 130.1, 129.9, 126.9, 125.0, 123.5, 123.0, 118.1, 117.6, 112.9, 87.4. **HRMS (ESI)**  $m/z$  calcd. for  $\text{C}_{21}\text{H}_{13}\text{ClN}_2\text{O}_3\text{Na}^+$   $[\text{M}+\text{Na}]^+$  : 399.0512, found: 399.0518.

#### 6-(3-fluoro-4-methylphenyl)-6-hydroxy-8H-indazolo[1,2-a]cinnoline-5,8(6H)-dione (**5f**)

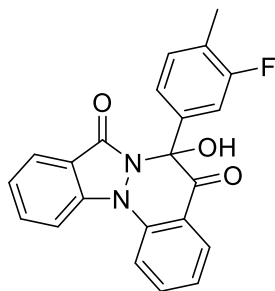

The reaction was performed according to general procedure B with 1-phenyl-1,2-dihydro-3*H*-indazol-3-one **1a** (42.0 mg, 0.2 mmol) and 2-(dimethyl(oxo)- $\lambda^6$ -sulfanylidene)-1-(3-fluoro-4-methylphenyl)ethan-1-one **2l** (68.5 mg, 0.3 mmol). After purification by silica gel chromatography (petroleum ether/ethyl acetate = 4:1,  $R_f$  = 0.2), the desired product **5f** was obtained as a yellow oil (24.4 mg, 33% yield).

**<sup>1</sup>H NMR** (400 MHz, CDCl<sub>3</sub>)  $\delta$  8.06 (d,  $J$  = 7.9 Hz, 1H), 7.99 (d,  $J$  = 7.7 Hz, 1H), 7.92 (d,  $J$  = 8.5 Hz, 1H), 7.86 (d,  $J$  = 8.5 Hz, 1H), 7.79 (t,  $J$  = 7.8 Hz, 1H), 7.71 (t,  $J$  = 7.8 Hz, 1H), 7.37 (t,  $J$  = 7.5 Hz, 1H), 7.22 (t,  $J$  = 7.5 Hz, 1H), 7.13 – 7.02 (m, 3H), 6.88 (s, 1H), 2.19 (s, 3H). **<sup>13</sup>C NMR** (101 MHz, CDCl<sub>3</sub>)  $\delta$  185.3, 164.4, 161.5 (d,  $J$  = 246.0 Hz), 141.2, 139.8, 138.1 (d,  $J$  = 6.8 Hz), 136.5, 134.4, 132.1 (d,  $J$  = 5.3 Hz), 130.4, 126.9, 126.7 (d,  $J$  = 0.5 Hz), 125.2, 123.8 (d,  $J$  = 8.0 Hz), 121.0 (d,  $J$  = 3.5 Hz), 117.9, 117.3, 113.2, 112.9, 112.7, 90.6, 14.5. **<sup>19</sup>F NMR** (376 MHz, CDCl<sub>3</sub>)  $\delta$  -115.56. **HRMS (ESI)**  $m/z$  calcd. for C<sub>22</sub>H<sub>16</sub>FN<sub>2</sub>O<sub>3</sub><sup>+</sup> [M+H]<sup>+</sup> : 375.1145, found: 375.1139.

#### 6-(tert-butyl)-6-hydroxy-8*H*-indazolo[1,2-*a*]cinnoline-5,8(6*H*)-dione (**5g**)

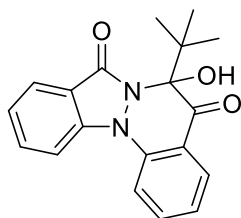

The reaction was performed according to general procedure B with 1-phenyl-1,2-dihydro-3*H*-indazol-3-one **1a** (42.0 mg, 0.2 mmol) and 1-(dimethyl(oxo)- $\lambda^6$ -sulfanylidene)-3,3-dimethylbutan-2-one **2t** (52.9 mg, 0.3 mmol). However, this product will be detected by TLC until the

temperature rises to 120°C. After purification by silica gel chromatography (petroleum ether/ethyl acetate = 2:1,  $R_f$  = 0.2), the desired product **5g** was obtained as a yellow oil (34.8 mg, 57% yield).

**<sup>1</sup>H NMR** (400 MHz, CDCl<sub>3</sub>)  $\delta$  7.98 (d,  $J$  = 7.9 Hz, 1H), 7.70 (t,  $J$  = 7.8 Hz, 1H), 7.65 (d,  $J$  = 7.8 Hz, 1H), 7.60 (dd,  $J$  = 8.0, 6.0 Hz, 2H), 7.36 (t,  $J$  = 7.4 Hz, 1H), 7.24 – 7.18 (m, 3H), 0.90 (s, 9H). **<sup>13</sup>C NMR** (101 MHz, CDCl<sub>3</sub>)  $\delta$  167.1, 158.1, 141.0, 135.8, 133.6, 129.7, 128.9, 126.6, 126.3, 125.1, 122.9, 116.2, 112.3, 112.1, 79.2, 41.9, 25.1. **HRMS (ESI)**  $m/z$  calcd. for C<sub>21</sub>H<sub>21</sub>N<sub>2</sub>O<sub>3</sub><sup>+</sup> [M+H]<sup>+</sup> : 349.1552, found: 349.1554.

#### 6-hydroxy-11-methyl-6-phenyl-8*H*-indazolo[1,2-*a*]cinnoline-5,8(6*H*)-dione (**5h**)

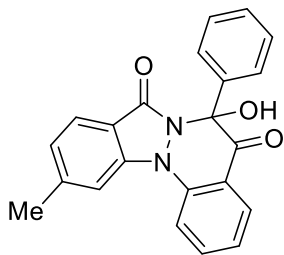

The reaction was performed according to general procedure B with 6-methyl-1-phenyl-1,2-dihydro-3*H*-indazol-3-one **1b** (44.8 mg, 0.2 mmol) and 2-(dimethyl(oxo)- $\lambda^6$ -sulfanylidene)-1-phenylethan-1-one **2a** (58.9 mg, 0.3 mmol). After purification by silica gel chromatography (petroleum ether/ethyl acetate = 2:1,  $R_f$  = 0.2), the

desired product **5h** was obtained as a yellow oil (43.6 mg, 61% yield). **<sup>1</sup>H NMR** (400 MHz, CDCl<sub>3</sub>)  $\delta$  8.15 (d,  $J$  = 7.8 Hz, 1H), 7.95 (dd,  $J$  = 8.2, 3.4 Hz, 2H), 7.83 – 7.77 (m, 2H), 7.48 – 7.42 (m, 2H), 7.37 (dd,  $J$  = 6.7, 3.0 Hz, 3H), 7.28 (t,  $J$  = 7.2 Hz, 2H), 7.12 (s, 1H), 2.71 (s, 3H). **<sup>13</sup>C NMR** (101 MHz, CDCl<sub>3</sub>)  $\delta$  185.7, 164.8, 145.7, 141.7, 139.9, 138.4, 136.3, 130.3, 129.68, 129.0, 125.7, 125.4, 124.7, 123.6, 117.3, 115.7, 113.1, 112.9, 91.4, 23.0. **HRMS (ESI)**  $m/z$  calcd. for C<sub>22</sub>H<sub>17</sub>N<sub>2</sub>O<sub>3</sub><sup>+</sup> [M+H]<sup>+</sup> : 357.1239, found: 357.1232.

#### 6-hydroxy-3-methyl-6-phenyl-8*H*-indazolo[1,2-*a*]cinnoline-5,8(6*H*)-dione (**5i**)

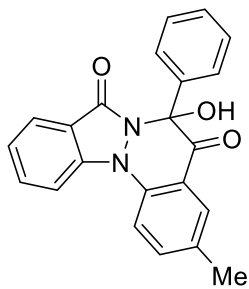

The reaction was performed according to general procedure B with 1-(*p*-tolyl)-1,2-dihydro-3*H*-indazol-3-one **1k** (44.9 mg, 0.2 mmol) and 2-(dimethyl(oxo)- $\lambda^6$ -sulfanylidene)-1-phenylethan-1-one **2a** (58.9 mg, 0.3 mmol). After purification by silica gel chromatography (petroleum ether/ethyl acetate = 2:1,  $R_f$  = 0.2), the desired product **5i** was obtained as

a yellow oil (46.3 mg, 65% yield). **<sup>1</sup>H NMR** (400 MHz, CDCl<sub>3</sub>)  $\delta$  7.98 (d,  $J$  = 7.9 Hz, 1H), 7.88 (d,  $J$  = 8.5 Hz, 1H), 7.85 (s, 1H), 7.79 – 7.73 (m, 2H), 7.49 (dd,  $J$  = 8.6, 1.7 Hz, 1H), 7.38 – 7.27 (m, 6H), 7.01 (s, 1H), 2.35 (s, 3H). **<sup>13</sup>C NMR** (101 MHz, CDCl<sub>3</sub>)  $\delta$  185.7, 164.2, 140.9, 138.3, 137.6, 137.2, 134.1, 133.5, 130.0, 129.6, 129.0, 125.6, 124.9, 123.3, 117.6, 117.1, 112.8, 112.7, 91.2, 20.5. **HRMS (ESI)**  $m/z$  calcd. for C<sub>22</sub>H<sub>17</sub>N<sub>2</sub>O<sub>3</sub><sup>+</sup> [M+H]<sup>+</sup> : 357.1239, found: 357.1246.

## 10. Copies of product NMR spectra

3a

$^1\text{H}$  NMR (400 MHz,  $\text{CDCl}_3$ )

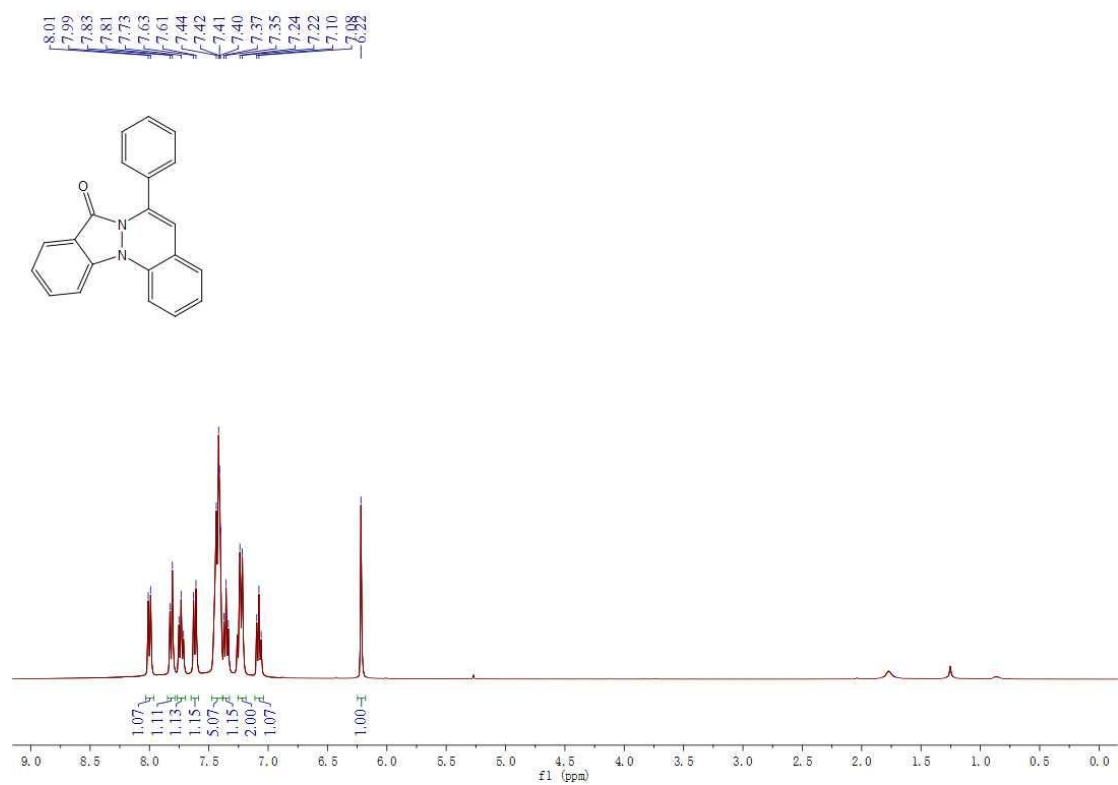

$^{13}\text{C}$  NMR (101 MHz,  $\text{CDCl}_3$ )

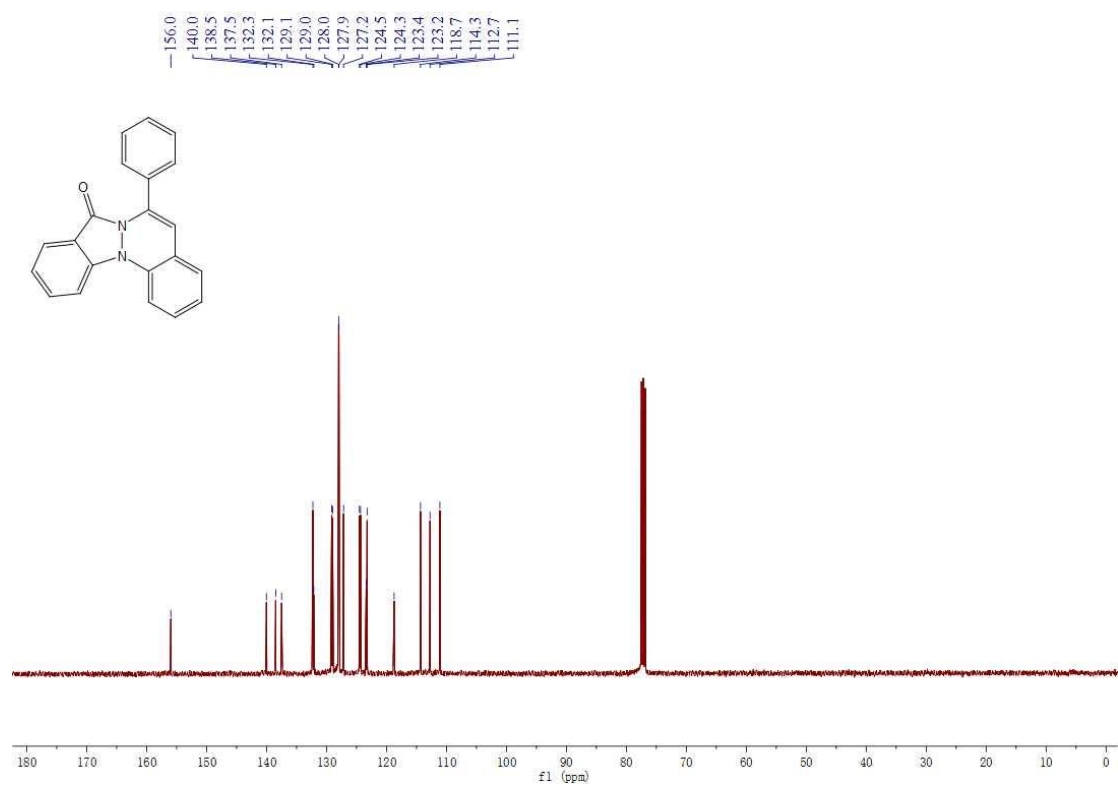

### 3b

<sup>1</sup>H NMR (400 MHz, CDCl<sub>3</sub>)

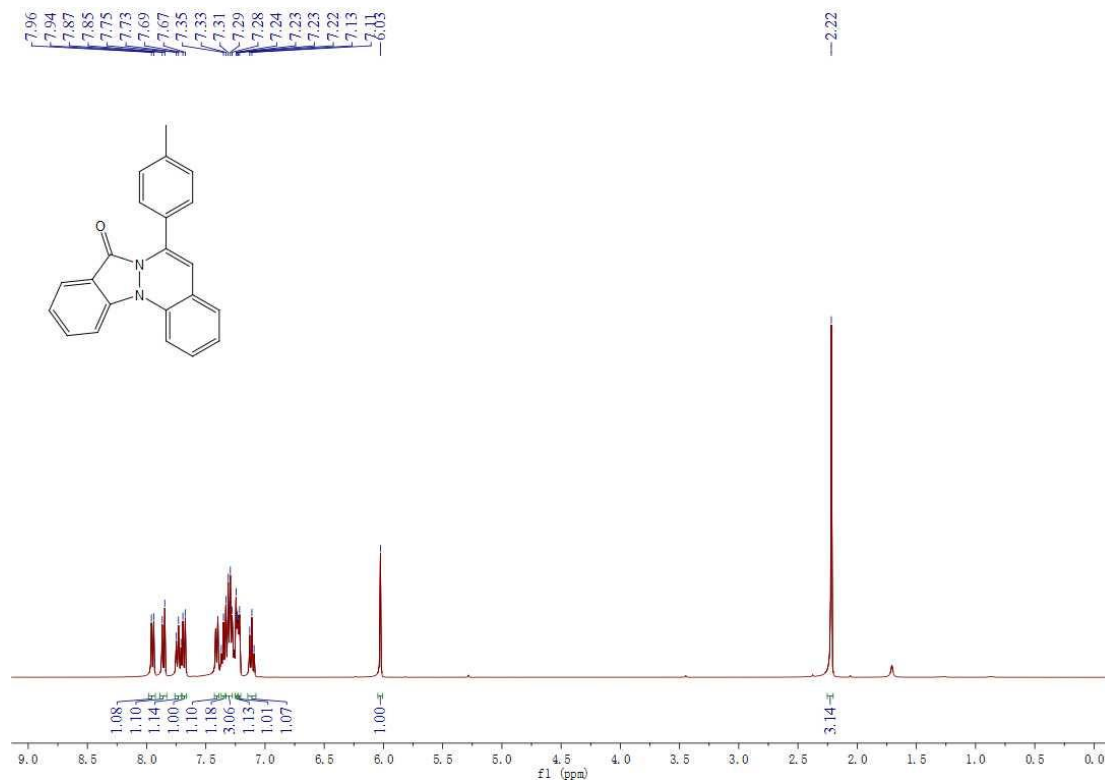

<sup>13</sup>C NMR (101 MHz, CDCl<sub>3</sub>)

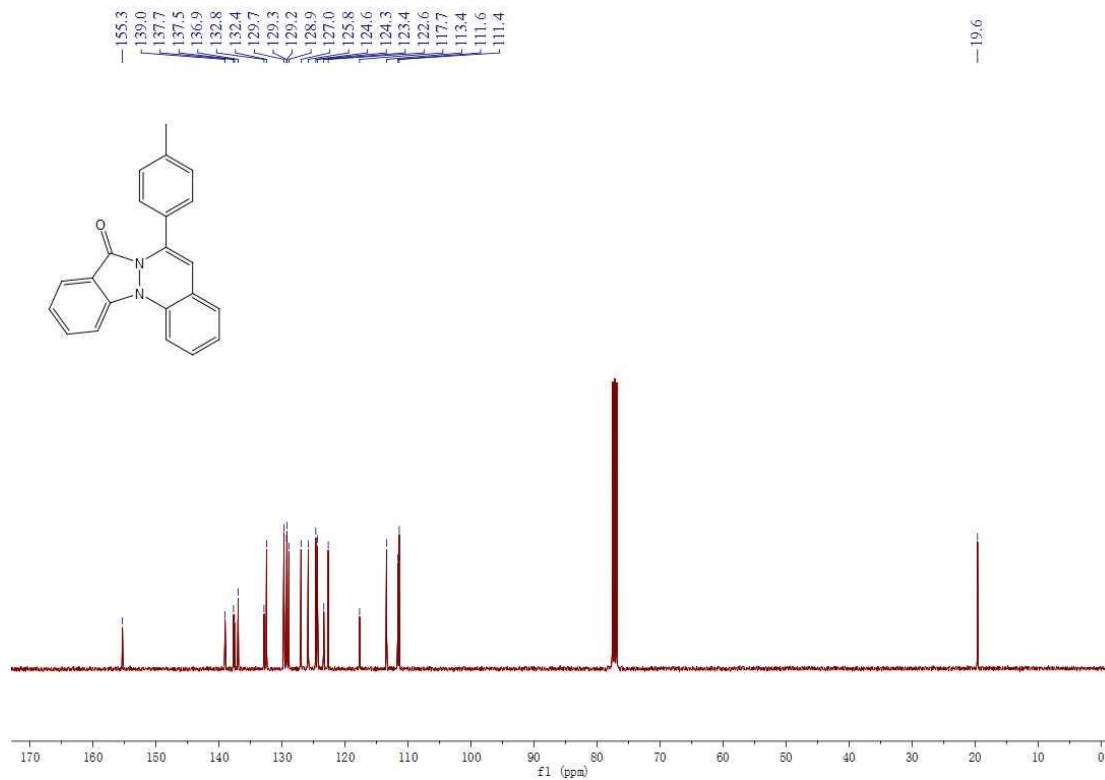



### 3c

<sup>1</sup>H NMR (400 MHz, CDCl<sub>3</sub>)

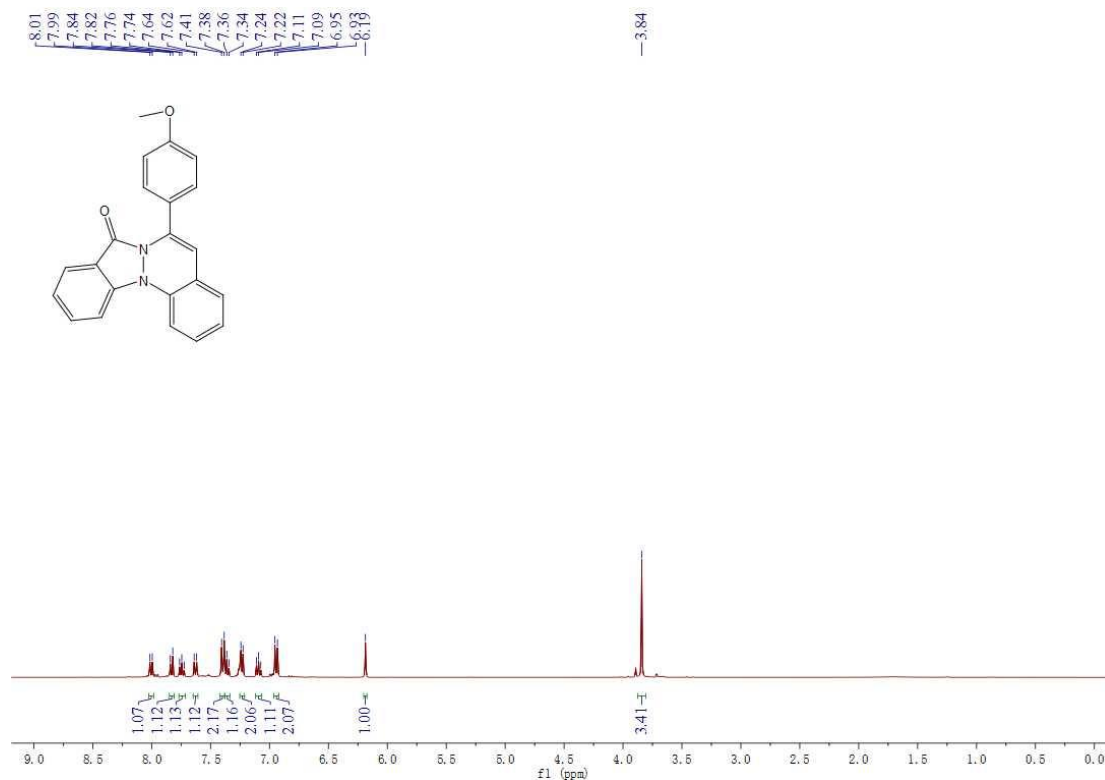

<sup>13</sup>C NMR (101 MHz, CDCl<sub>3</sub>)

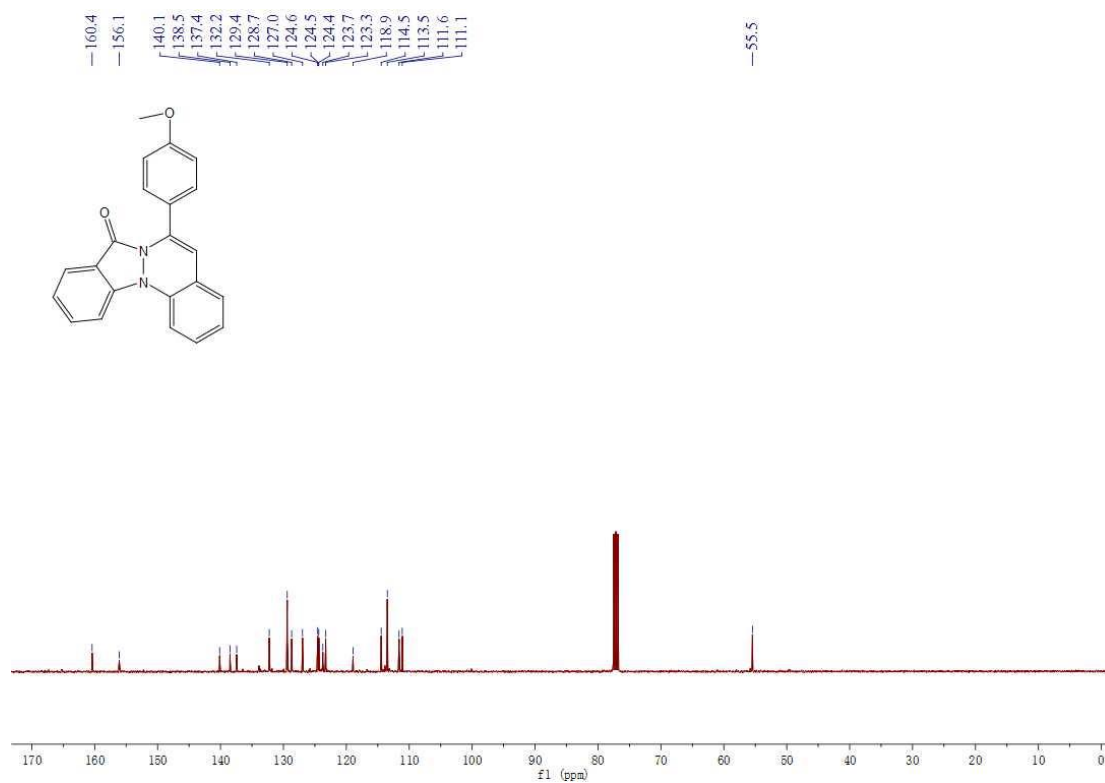

### 3d

<sup>1</sup>H NMR (400 MHz, CDCl<sub>3</sub>)

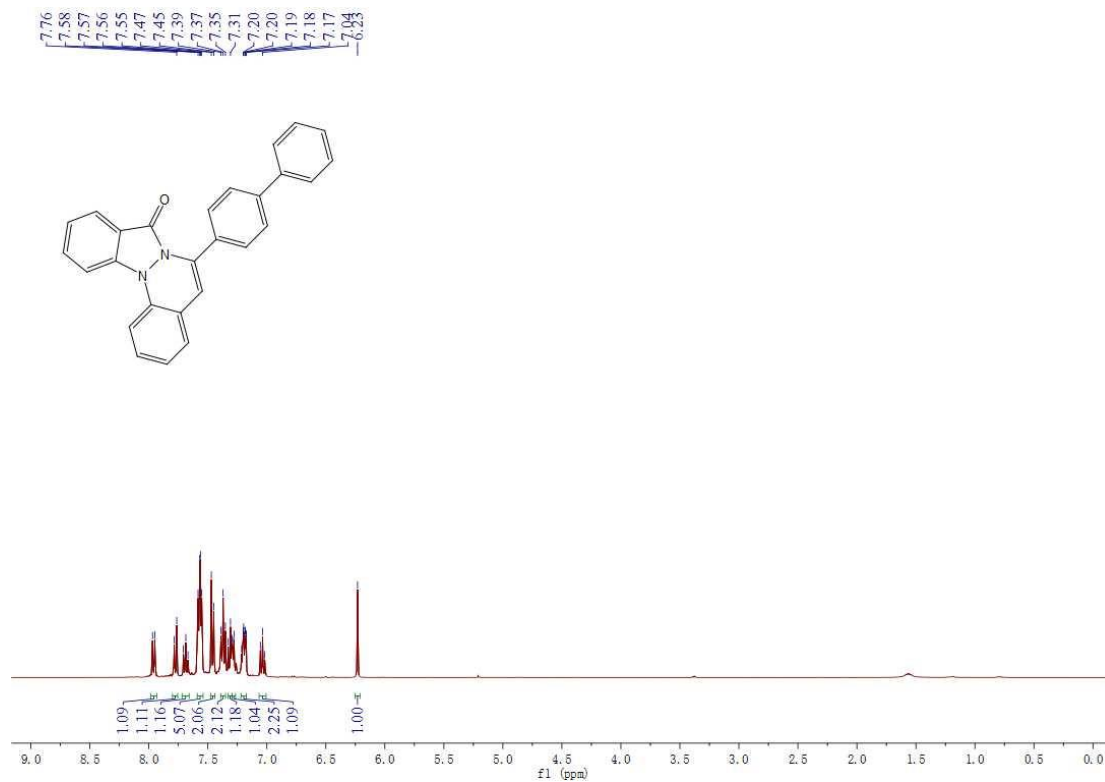

<sup>13</sup>C NMR (101 MHz, CDCl<sub>3</sub>)

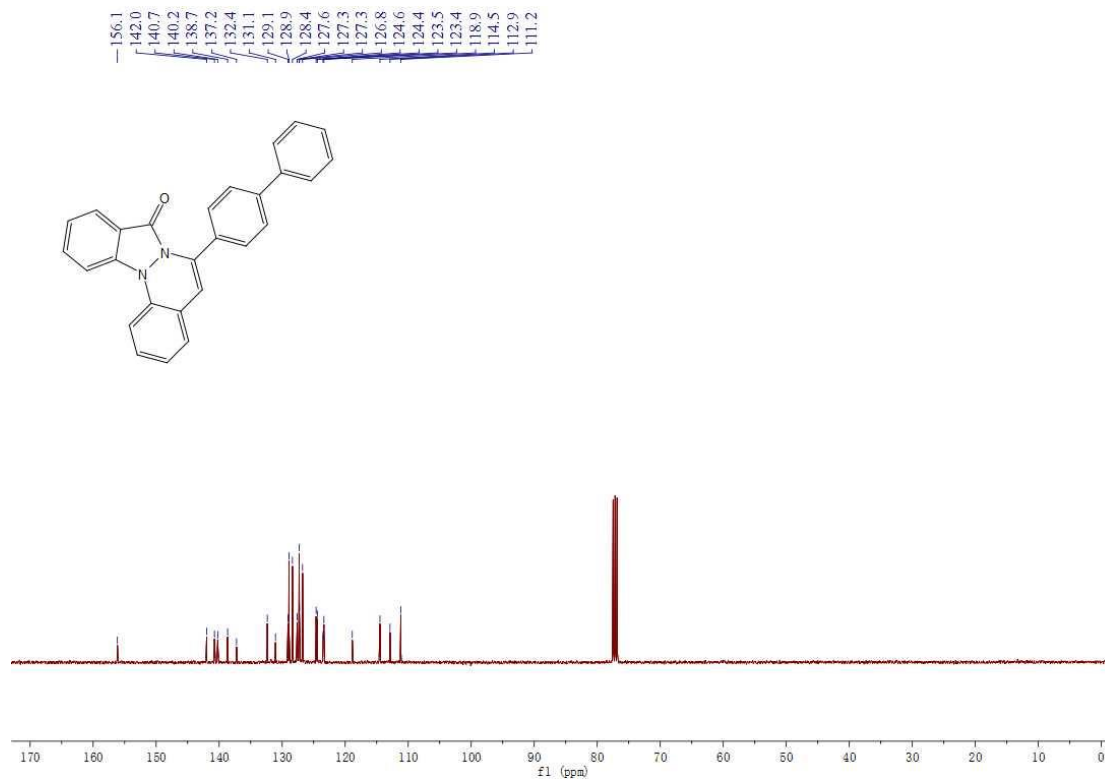

3e

<sup>1</sup>H NMR (400 MHz, CDCl<sub>3</sub>)

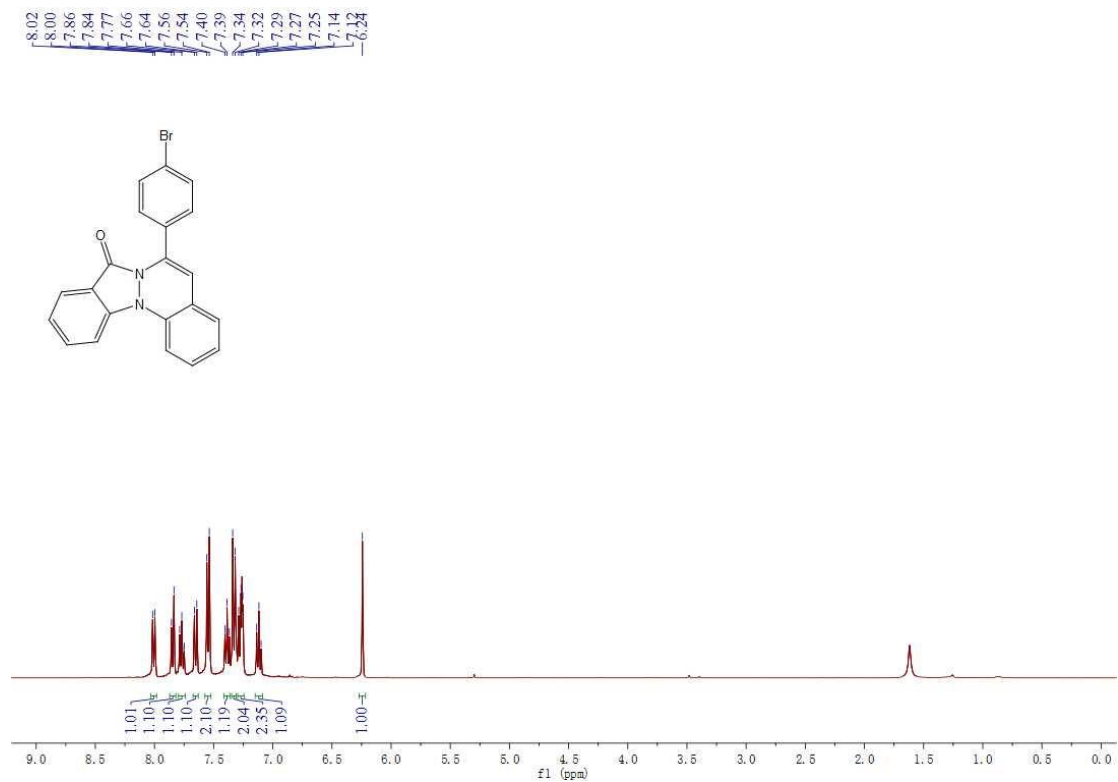

<sup>13</sup>C NMR (101 MHz, CDCl<sub>3</sub>)

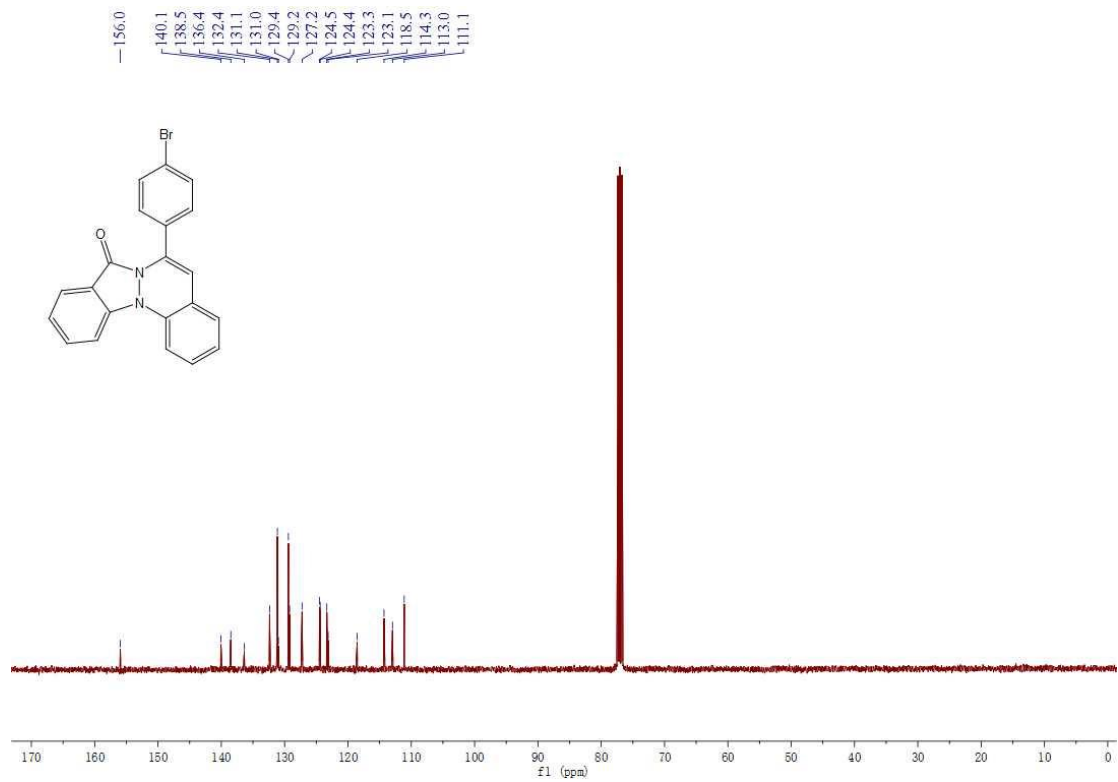

# 3f

## <sup>1</sup>H NMR (400 MHz, CDCl<sub>3</sub>)

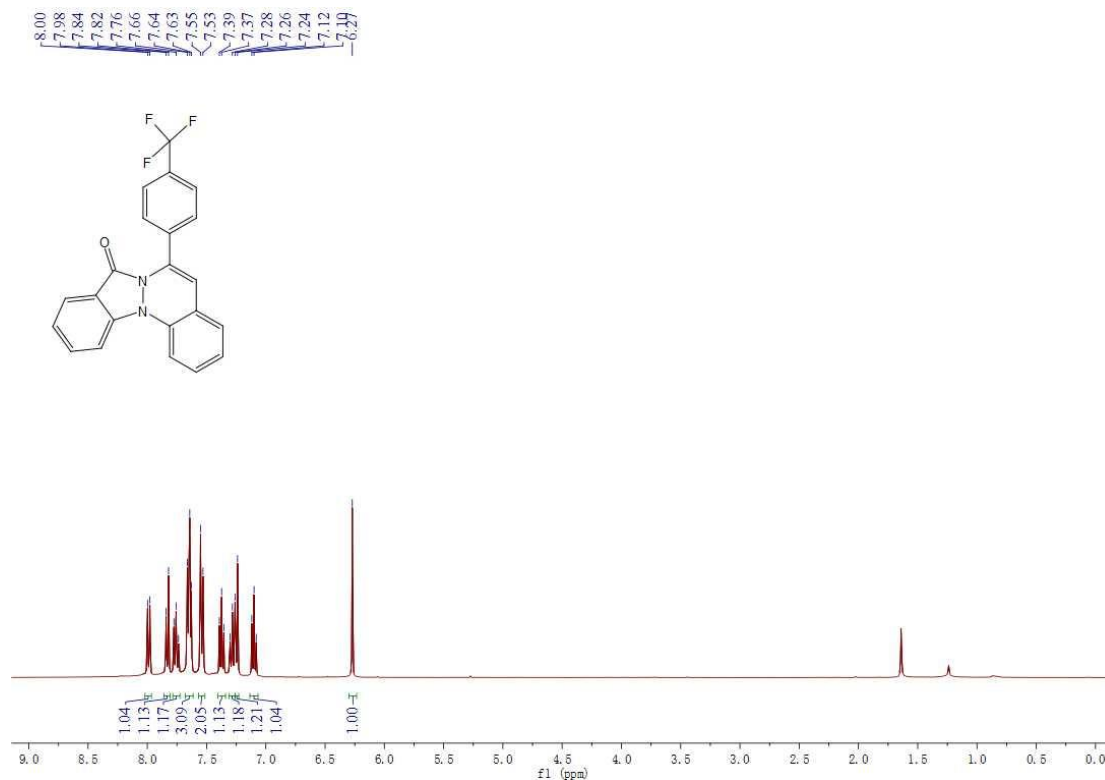

## <sup>13</sup>C NMR (101 MHz, CDCl<sub>3</sub>)

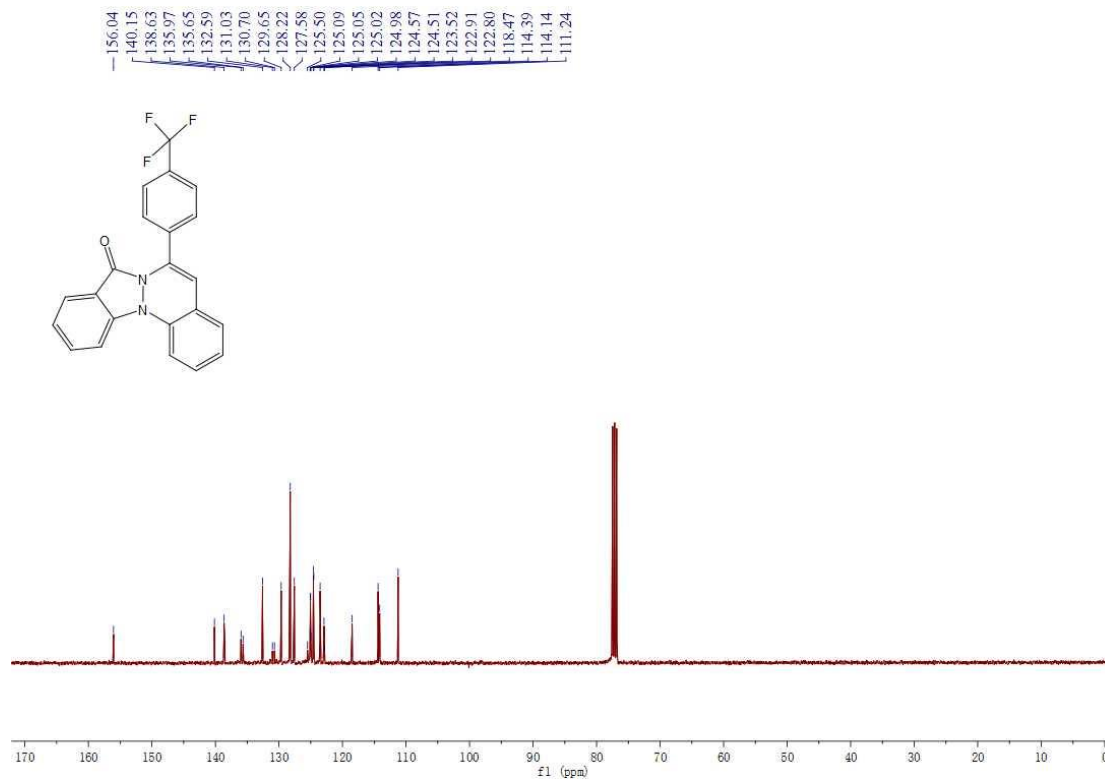

**<sup>19</sup>F NMR (376 MHz, CDCl<sub>3</sub>)**

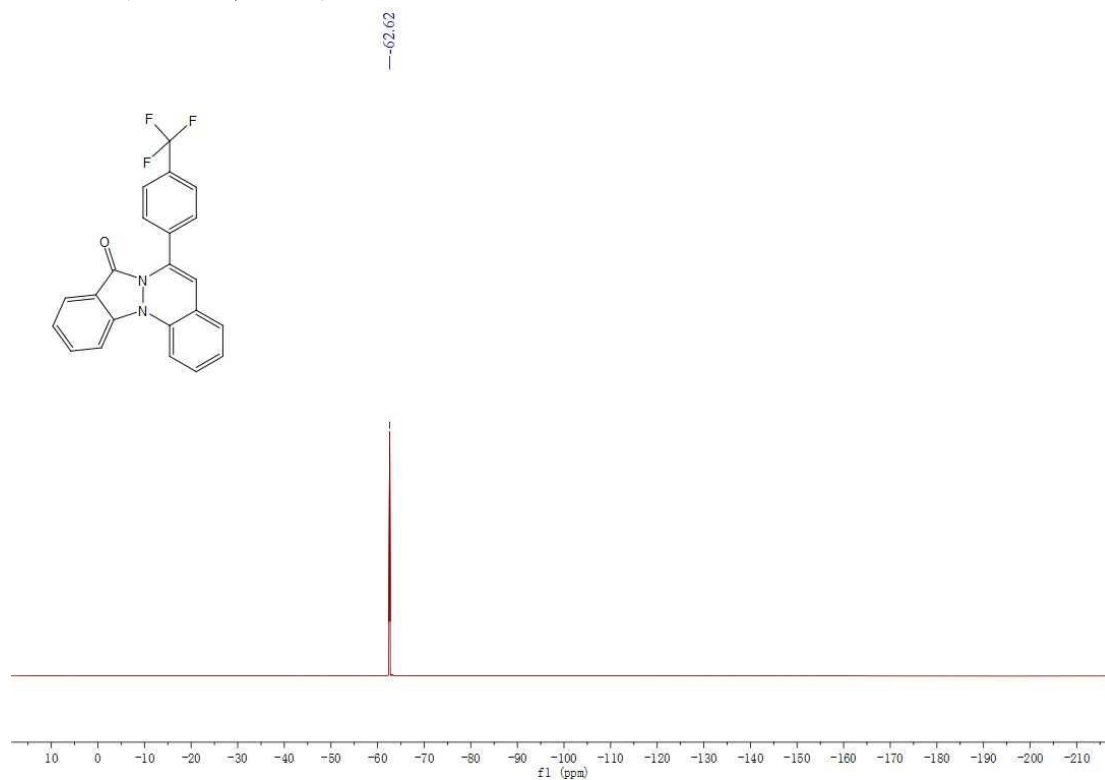

# 3g

## <sup>1</sup>H NMR (400 MHz, CDCl<sub>3</sub>)

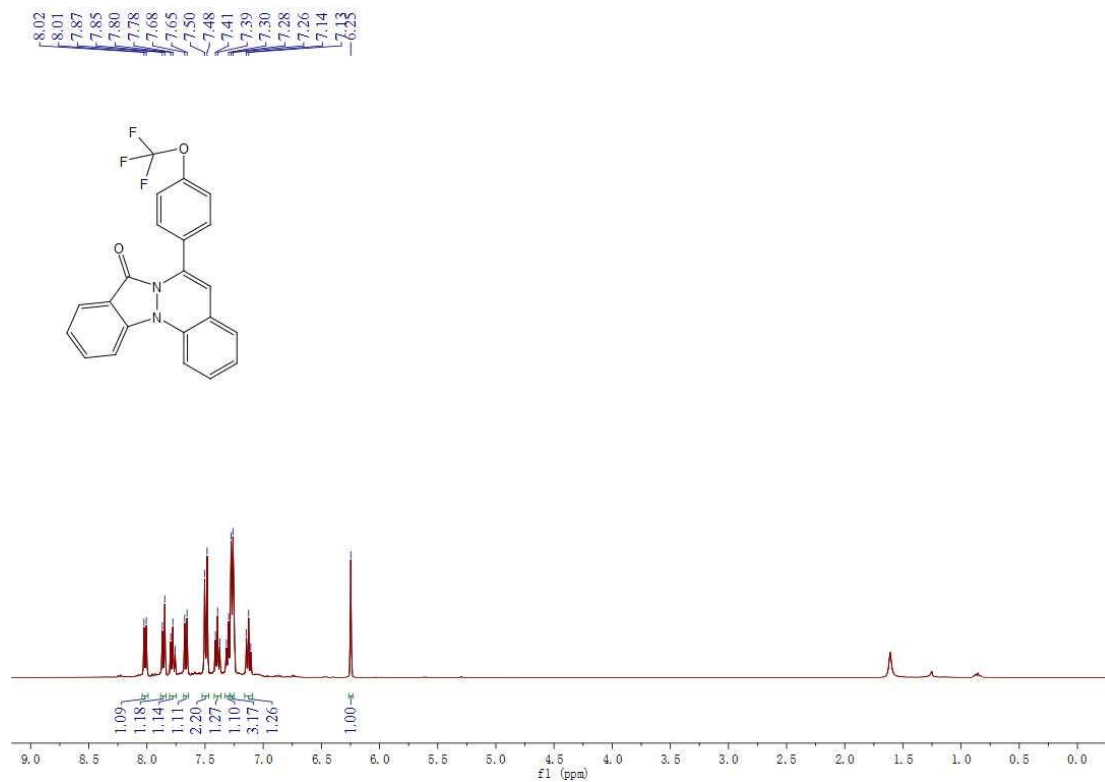

## <sup>13</sup>C NMR (101 MHz, CDCl<sub>3</sub>)

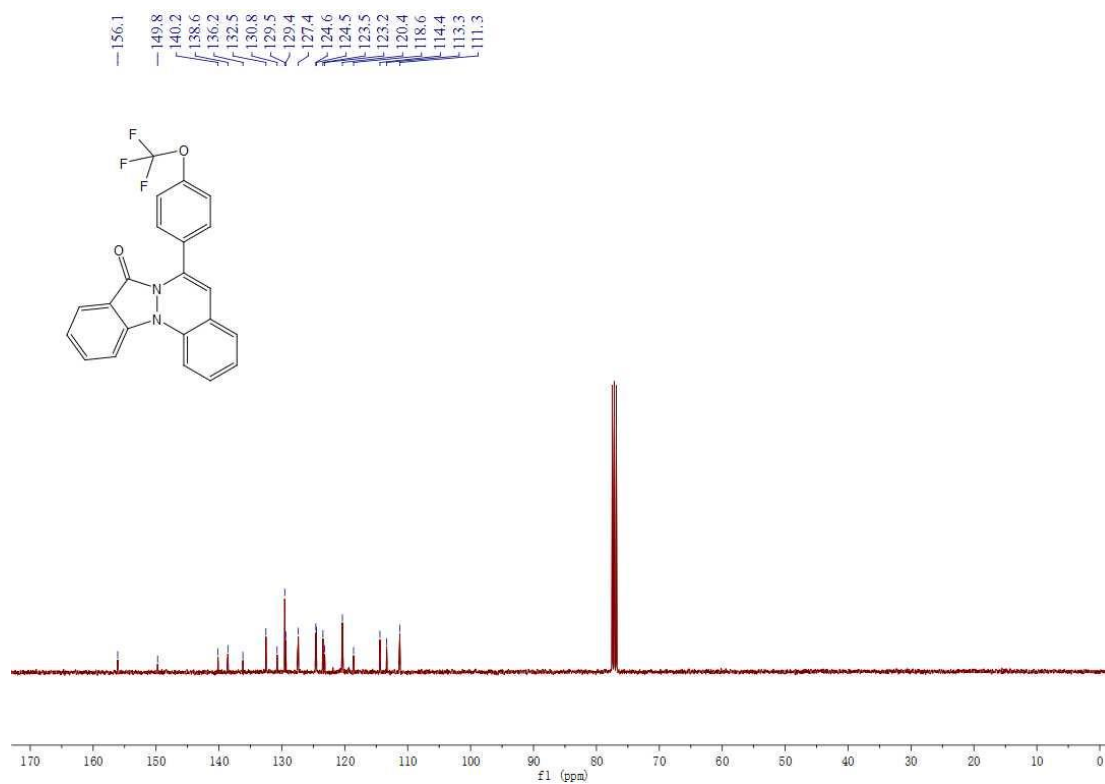

**$^{19}\text{F}$  NMR (376 MHz,  $\text{CDCl}_3$ )**

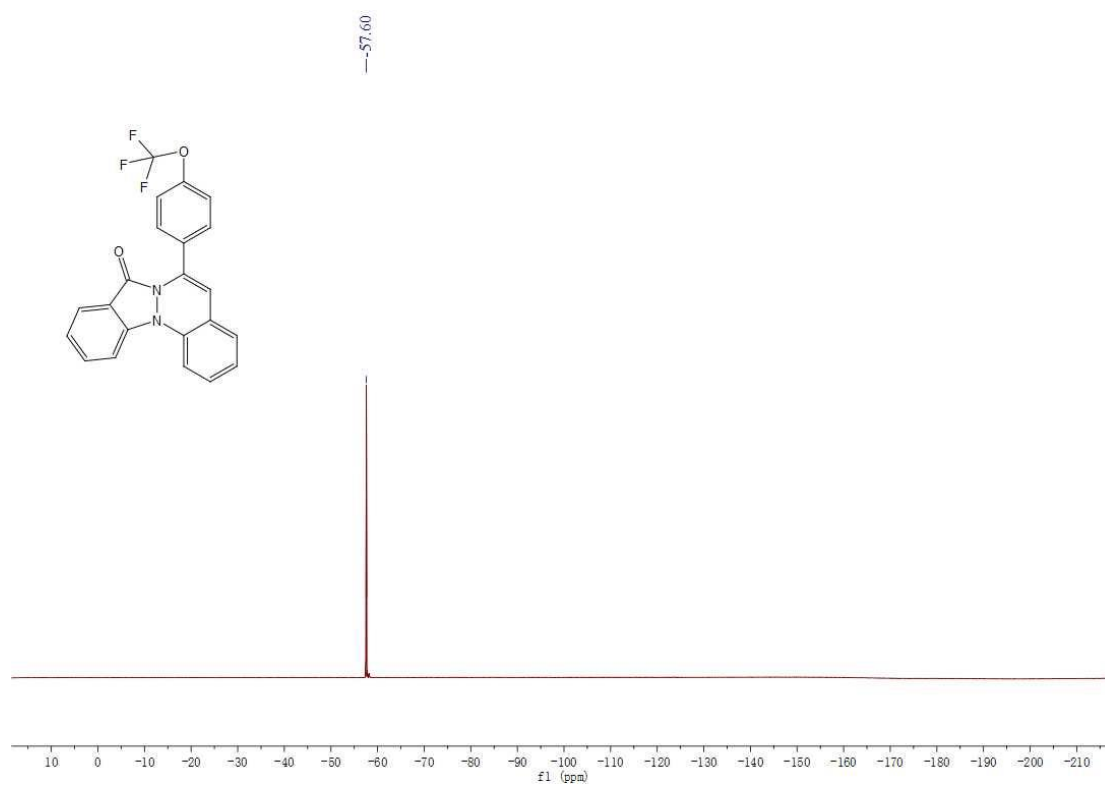

### 3h

<sup>1</sup>H NMR (400 MHz, CDCl<sub>3</sub>)

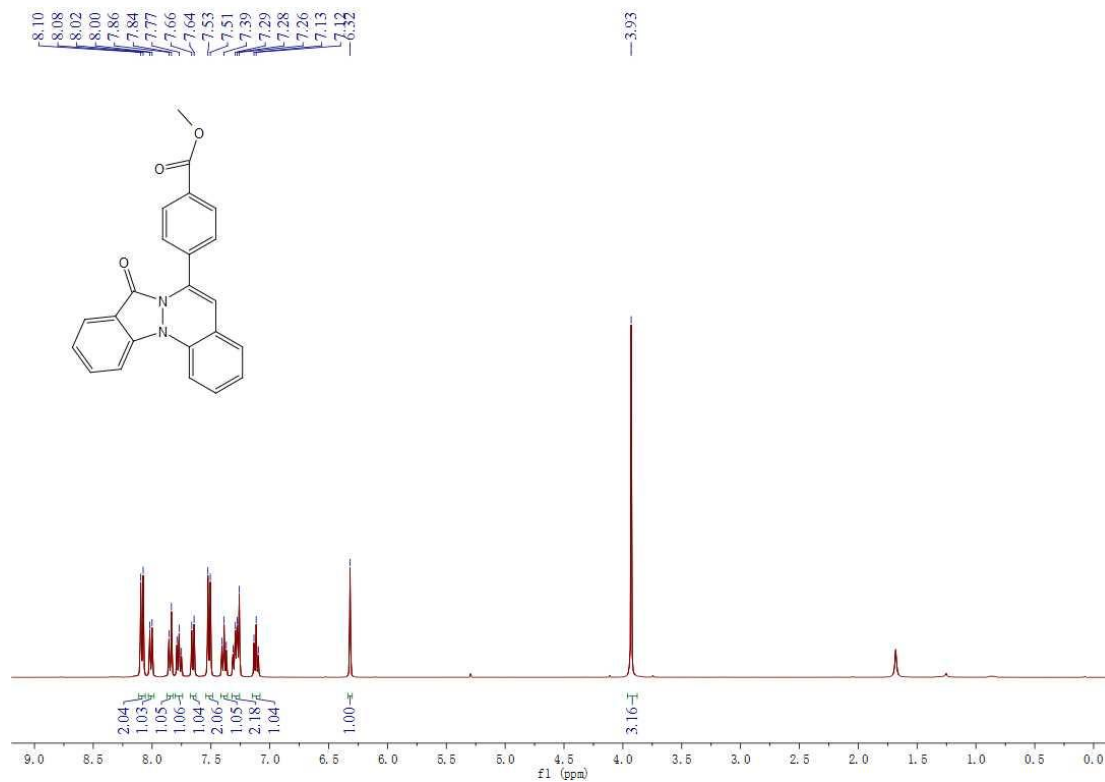

<sup>13</sup>C NMR (101 MHz, CDCl<sub>3</sub>)

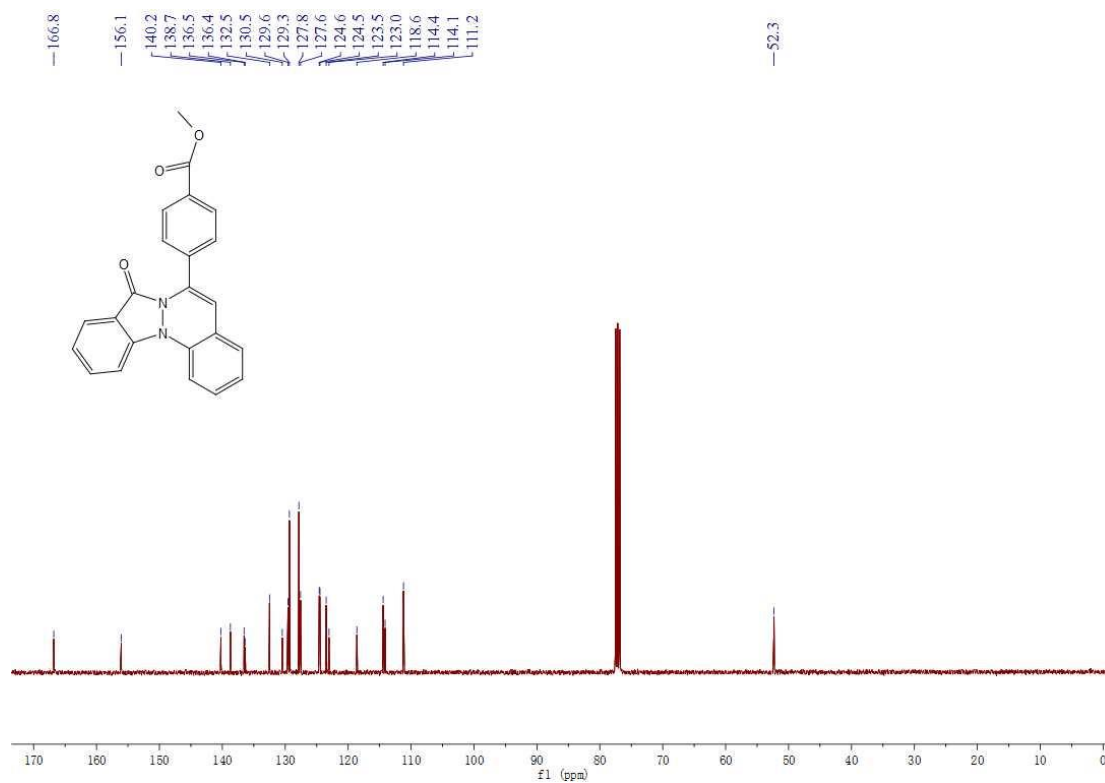



3i

<sup>1</sup>H NMR (400 MHz, CDCl<sub>3</sub>)

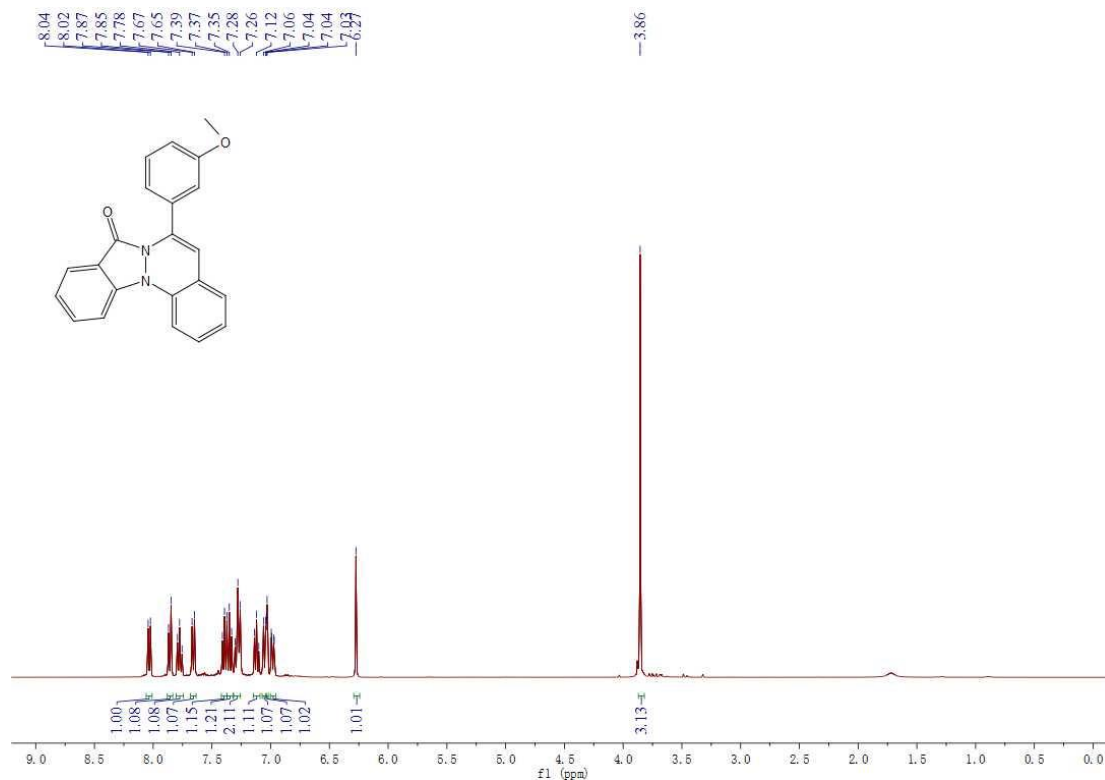

<sup>13</sup>C NMR (101 MHz, CDCl<sub>3</sub>)

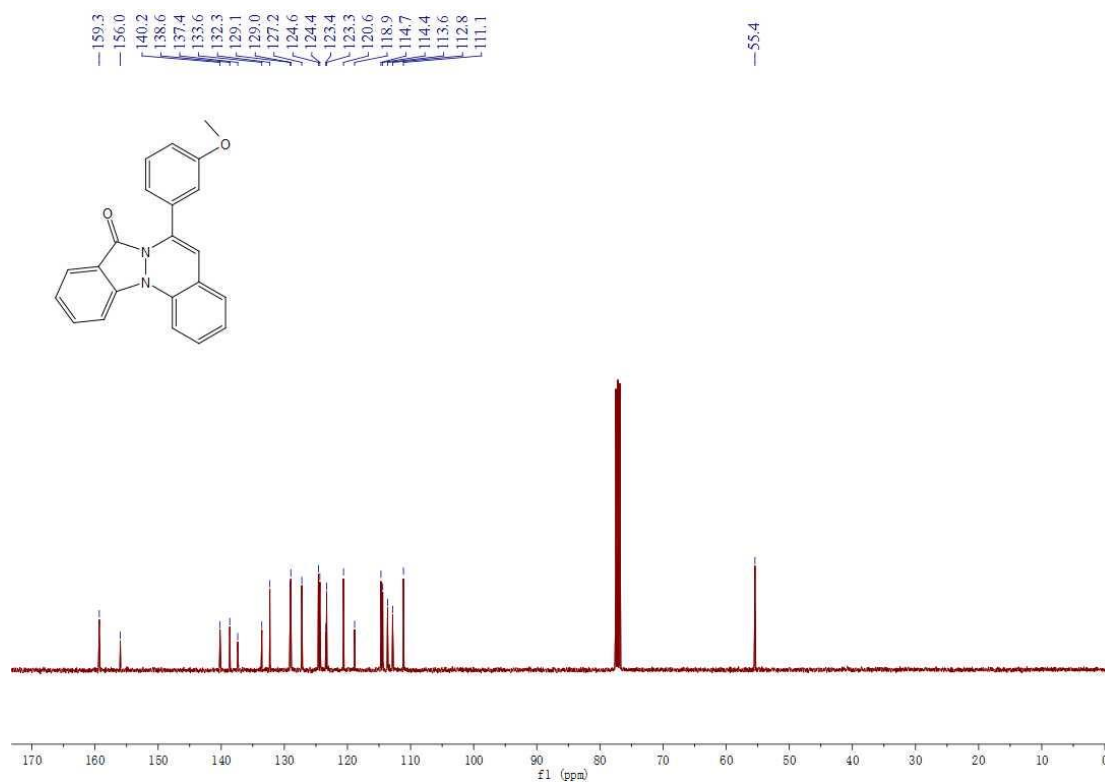

3j

<sup>1</sup>H NMR (400 MHz, CDCl<sub>3</sub>)

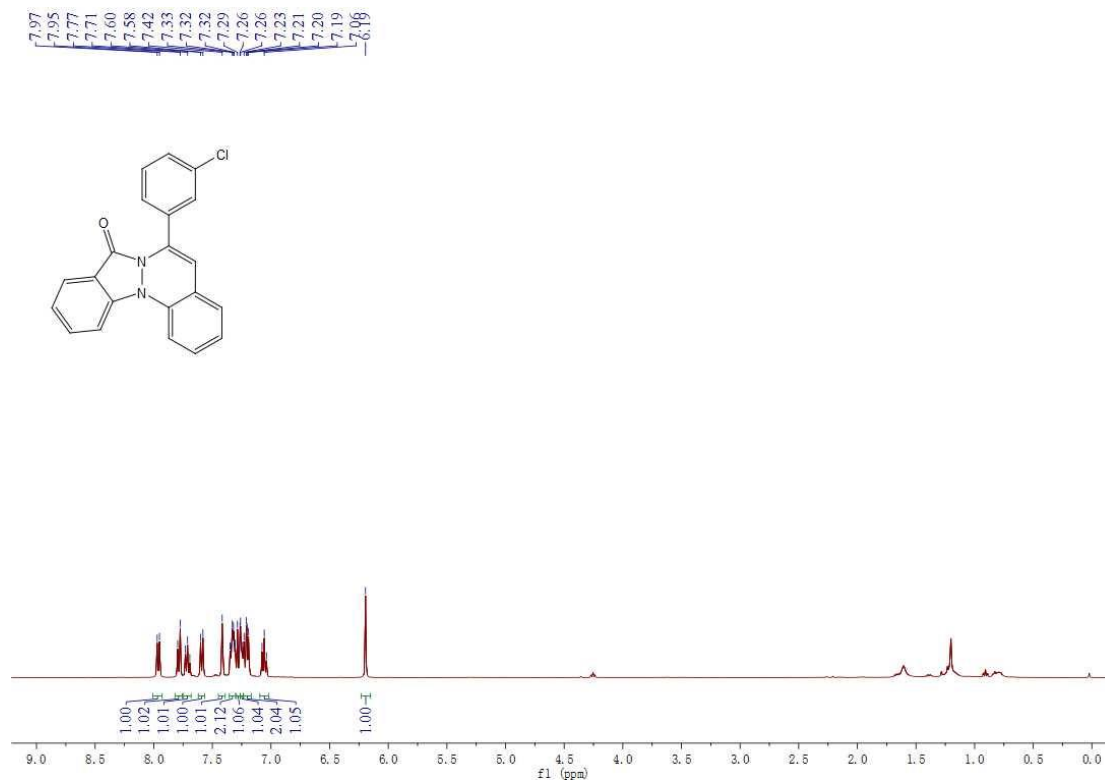

<sup>13</sup>C NMR (101 MHz, CDCl<sub>3</sub>)

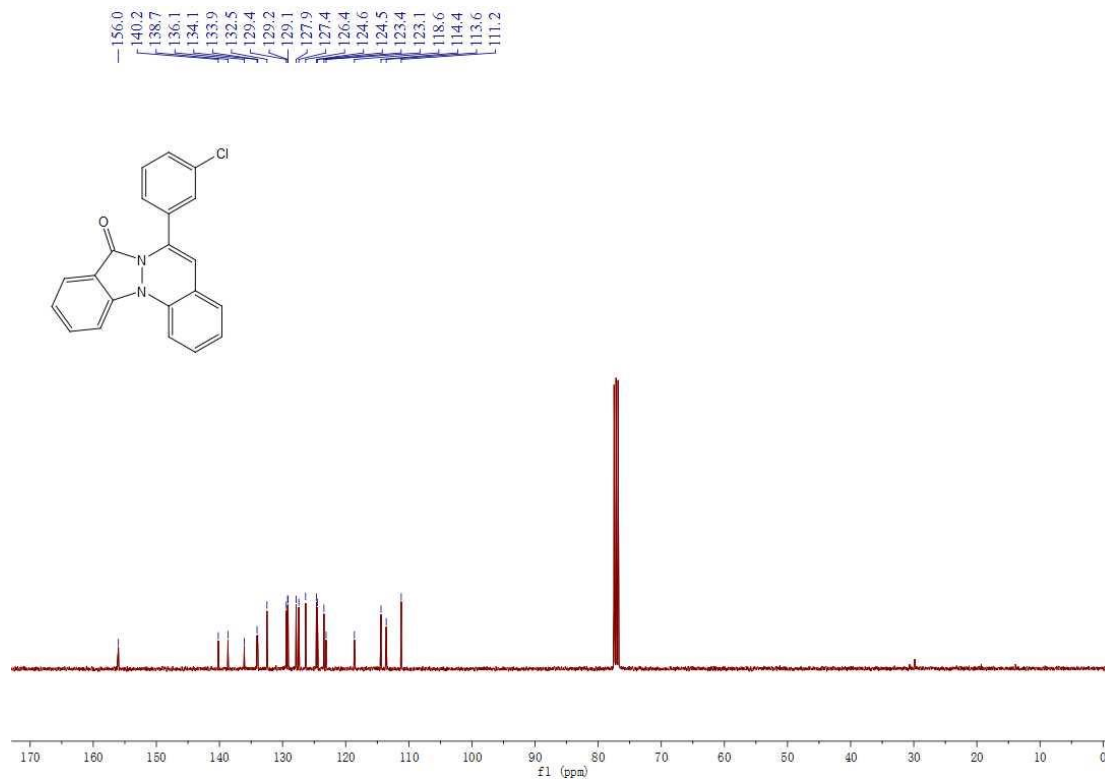

### 3k

<sup>1</sup>H NMR (400 MHz, CDCl<sub>3</sub>)

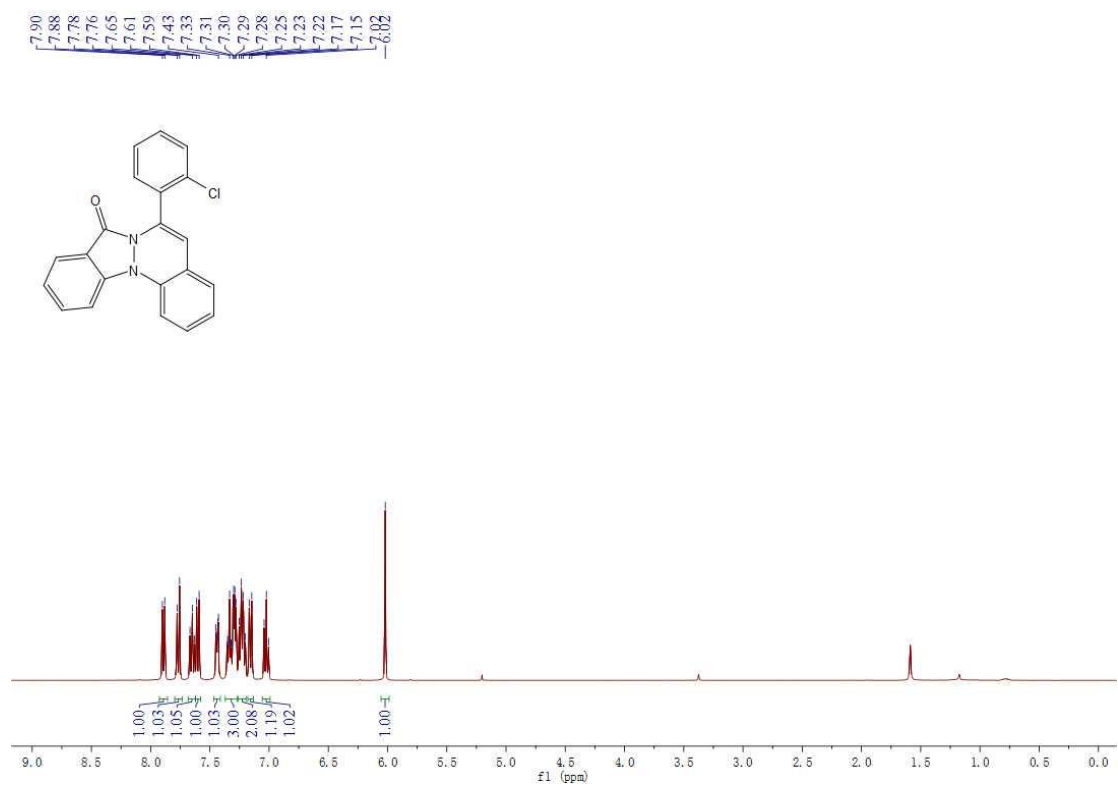

<sup>13</sup>C NMR (101 MHz, CDCl<sub>3</sub>)

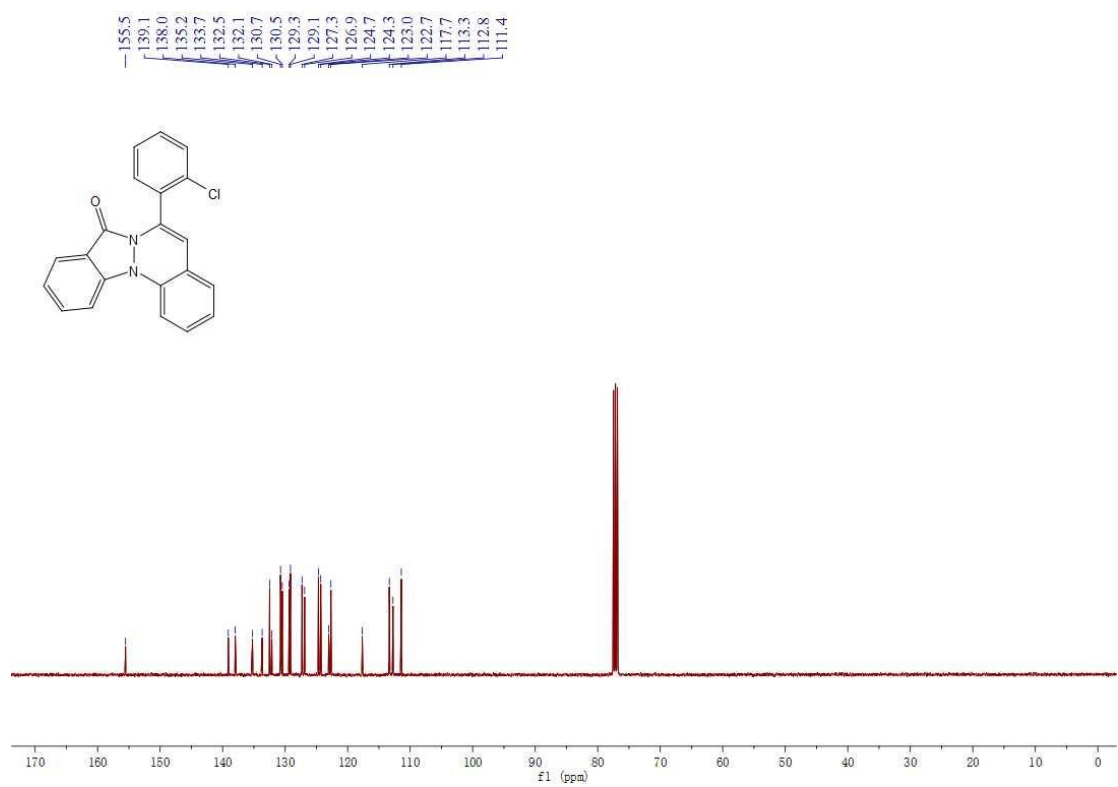

31

<sup>1</sup>H NMR (400 MHz, CDCl<sub>3</sub>)

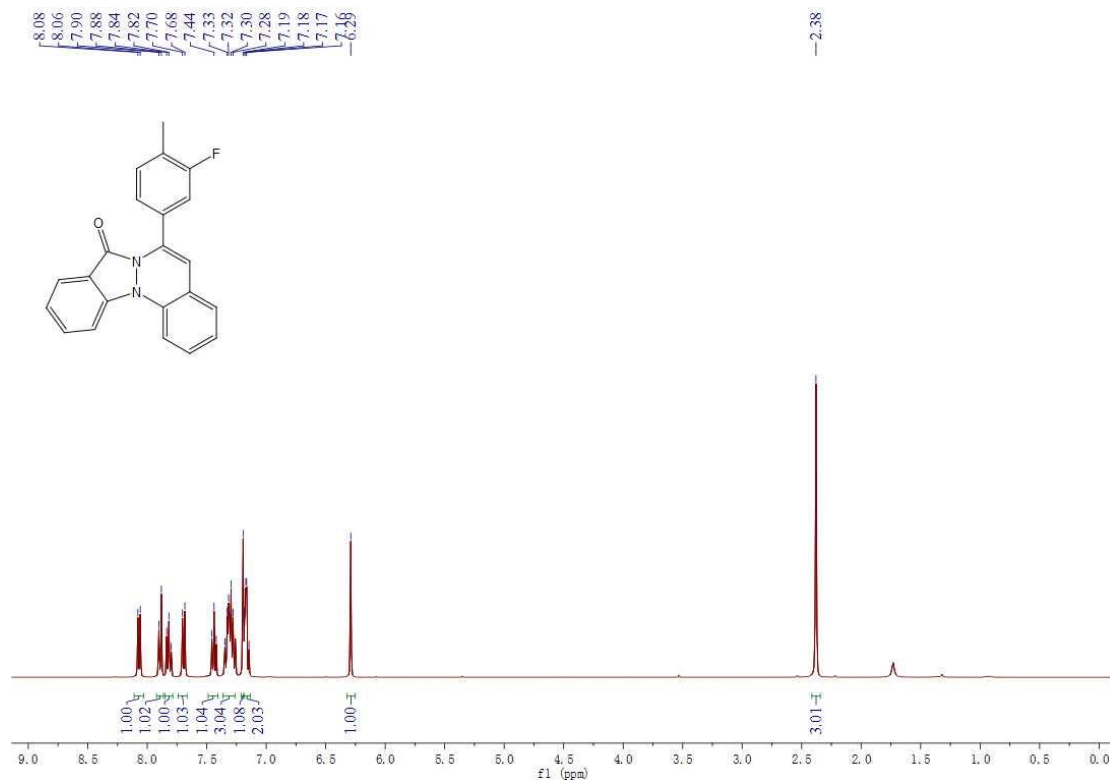

<sup>13</sup>C NMR (101 MHz, CDCl<sub>3</sub>)

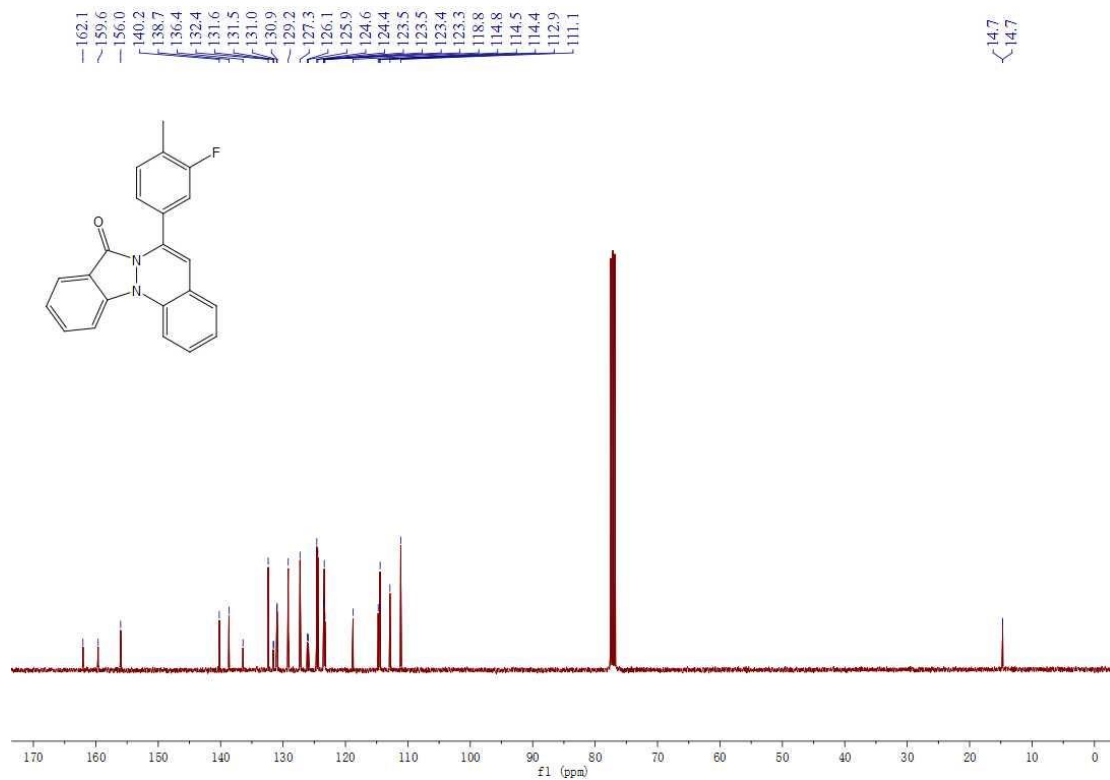

**$^{19}\text{F}$  NMR (376 MHz,  $\text{CDCl}_3$ )**

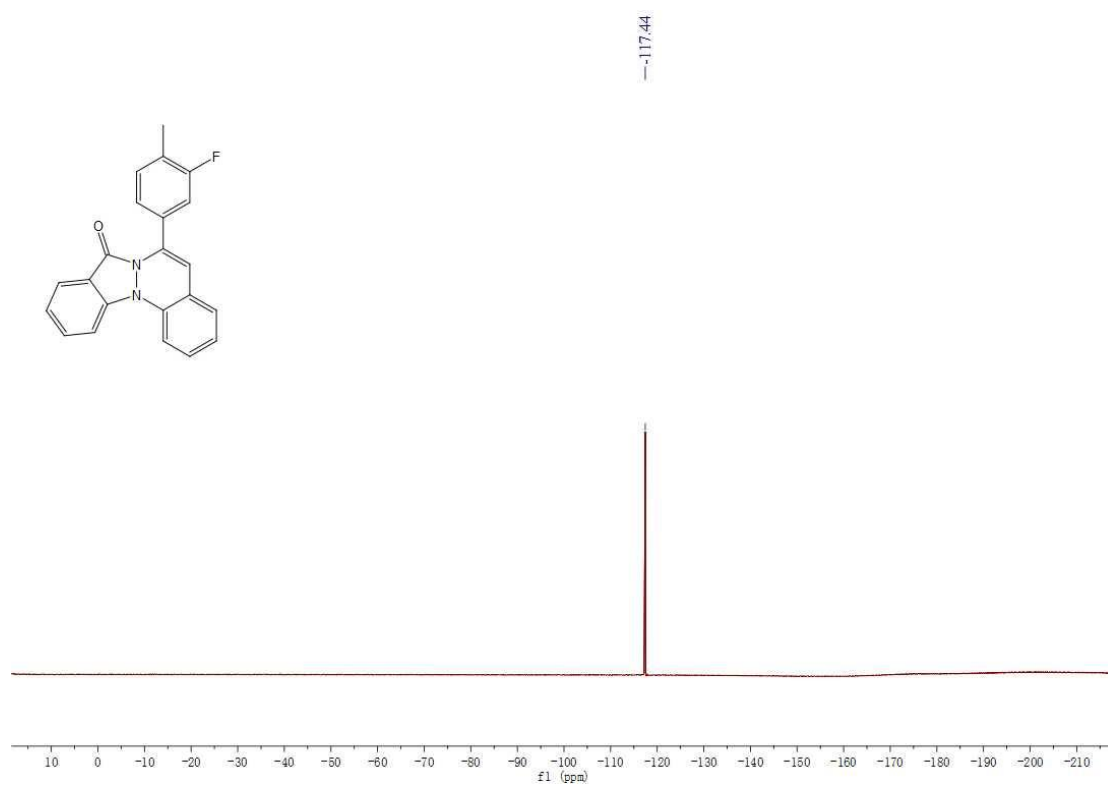

### 3m

<sup>1</sup>H NMR (400 MHz, CDCl<sub>3</sub>)

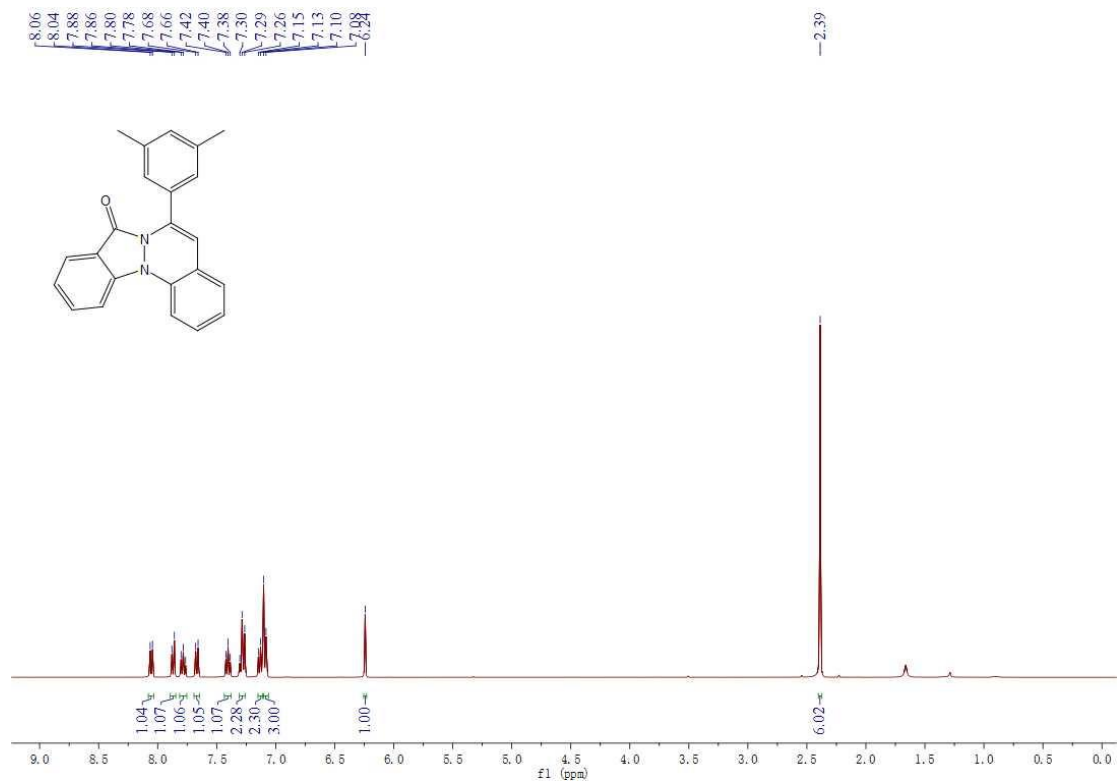

<sup>13</sup>C NMR (101 MHz, CDCl<sub>3</sub>)

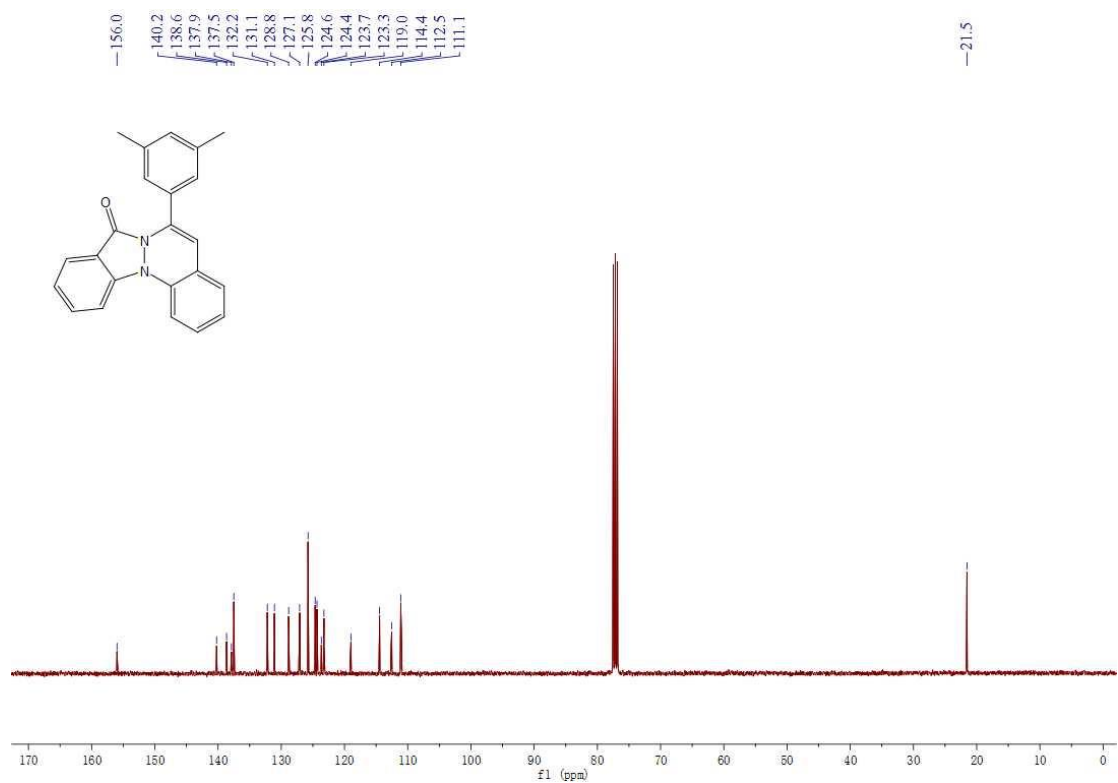

### 3n

<sup>1</sup>H NMR (400 MHz, CDCl<sub>3</sub>)

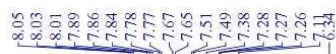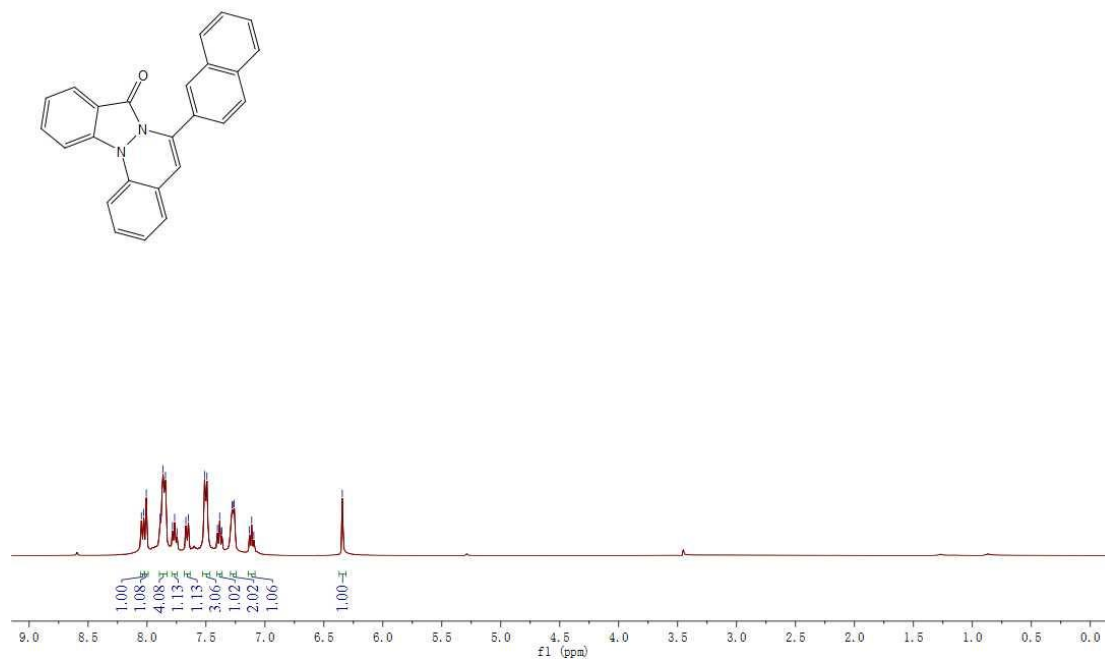

<sup>13</sup>C NMR (101 MHz, CDCl<sub>3</sub>)

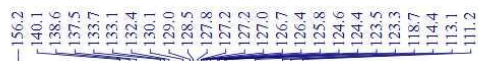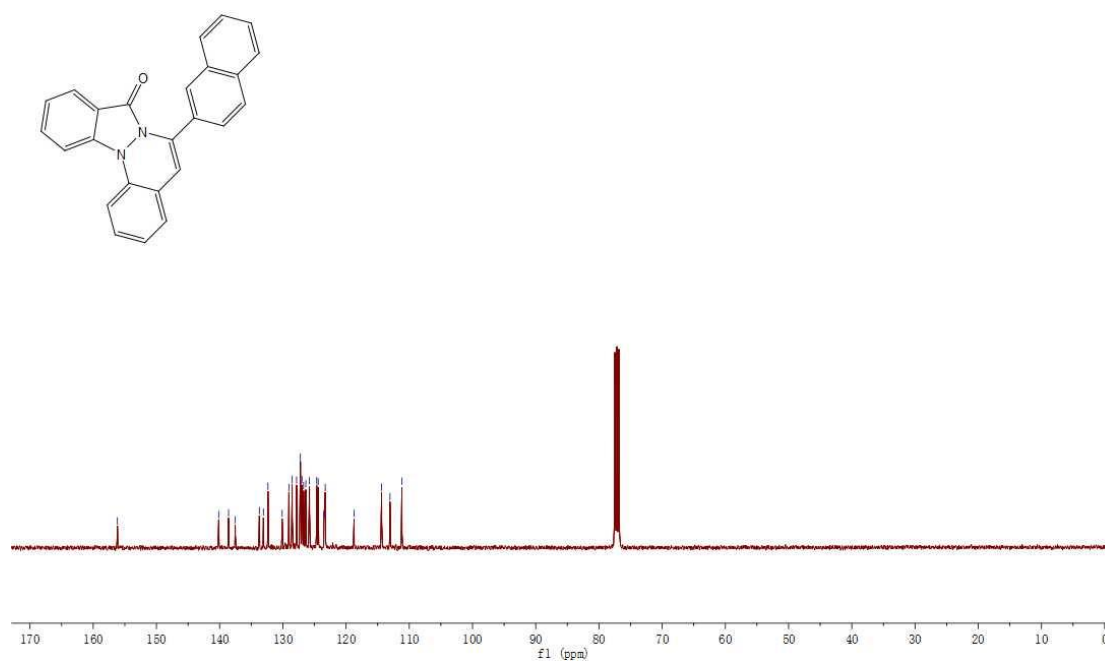

# 30

## <sup>1</sup>H NMR (400 MHz, CDCl<sub>3</sub>)

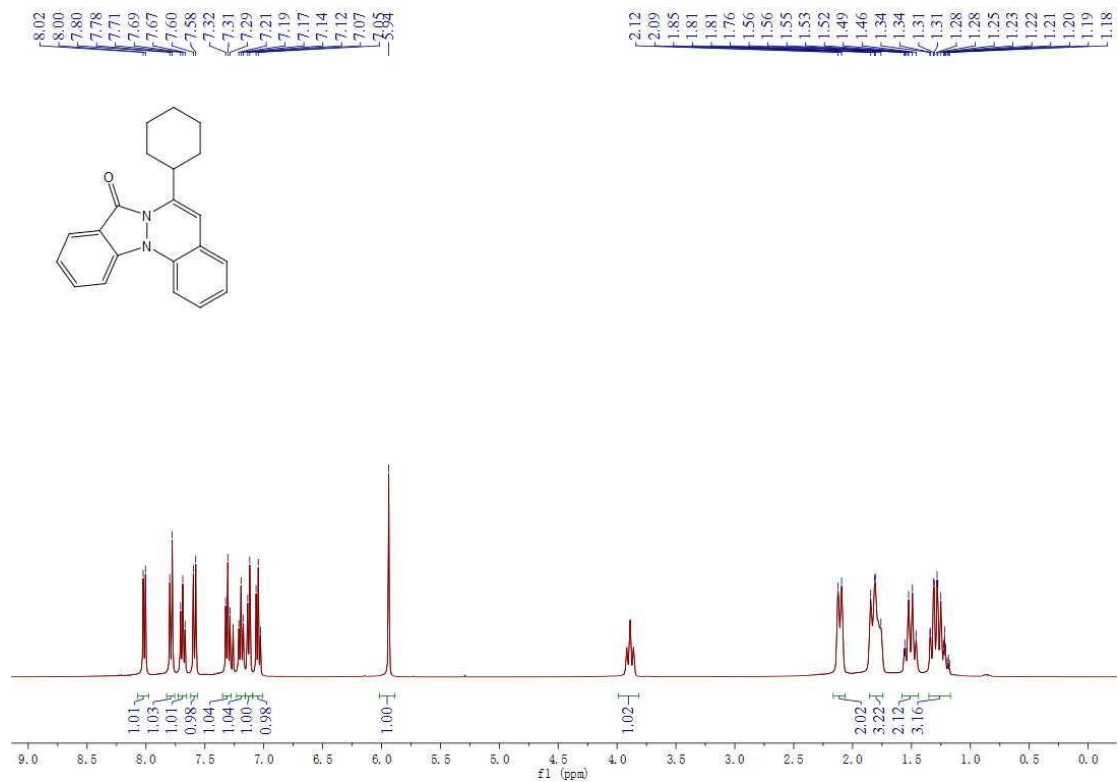

## <sup>13</sup>C NMR (101 MHz, CDCl<sub>3</sub>)

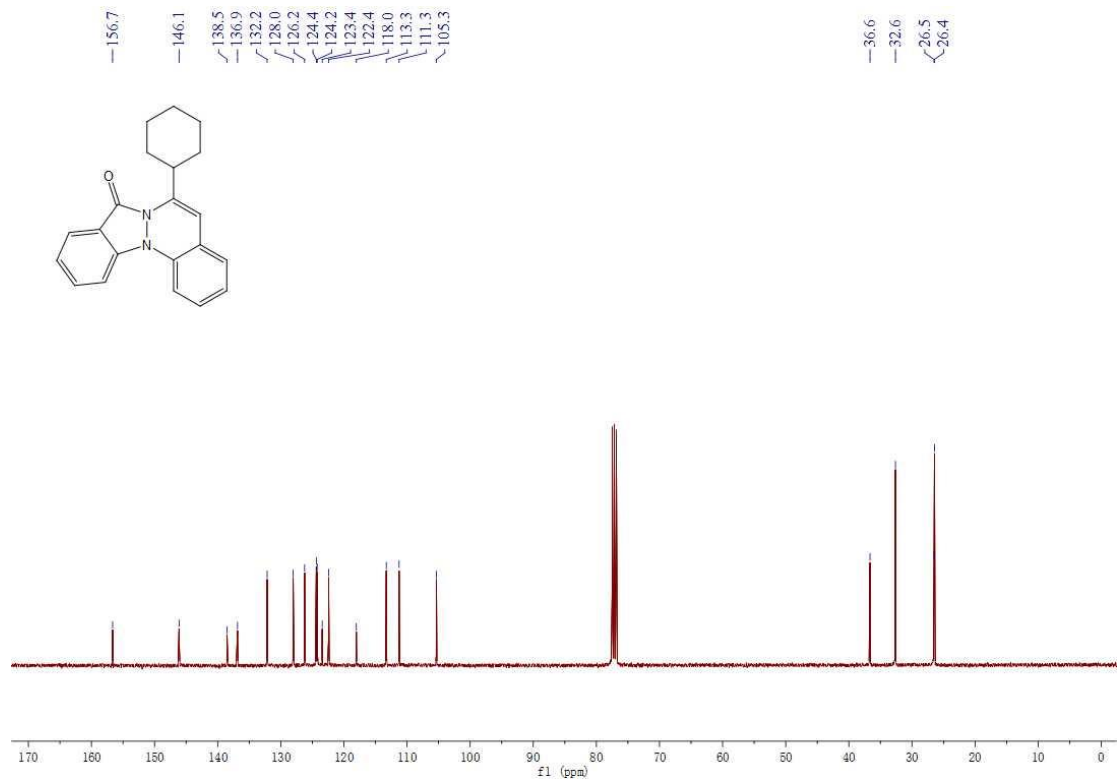



# 3p

<sup>1</sup>H NMR (400 MHz, CDCl<sub>3</sub>)

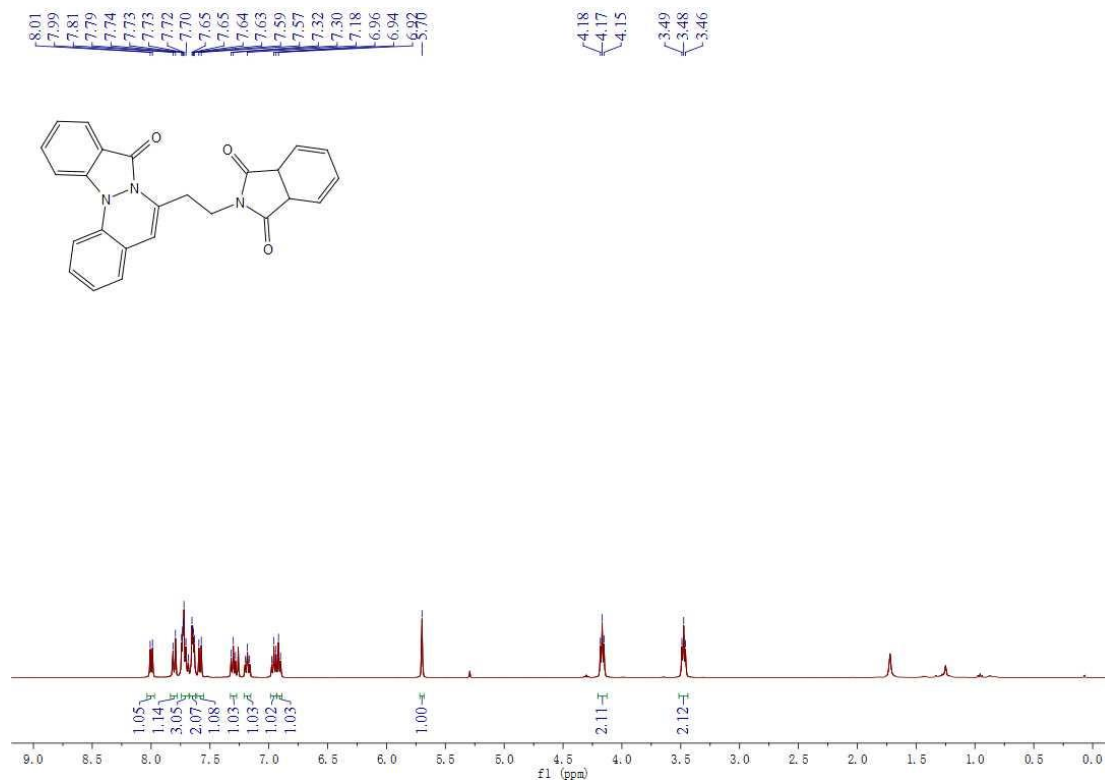

<sup>13</sup>C NMR (101 MHz, CDCl<sub>3</sub>)

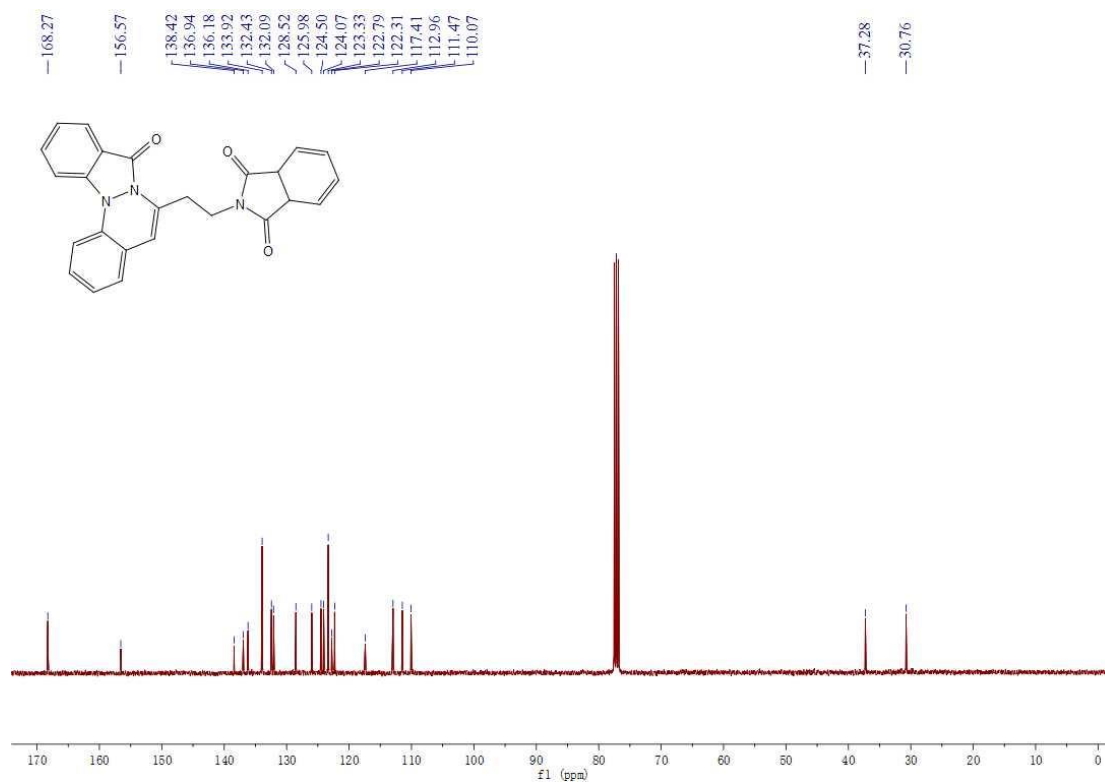

### 3q

<sup>1</sup>H NMR (400 MHz, CDCl<sub>3</sub>)

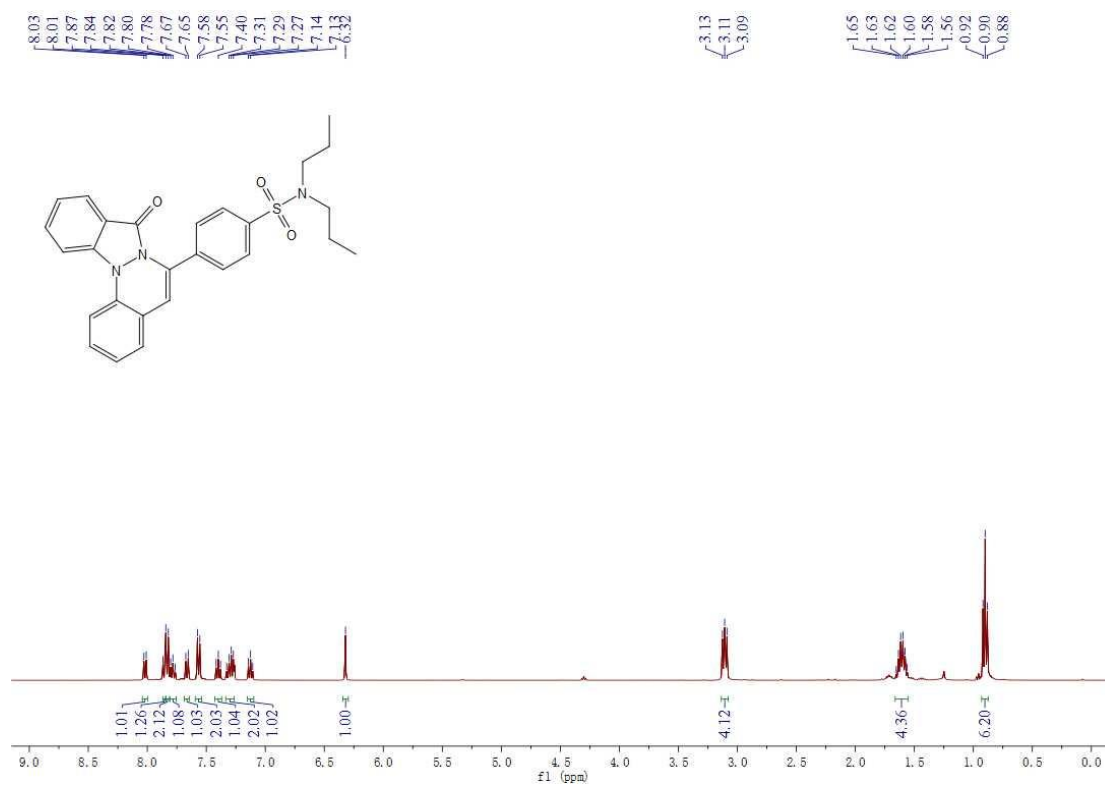

<sup>13</sup>C NMR (101 MHz, CDCl<sub>3</sub>)

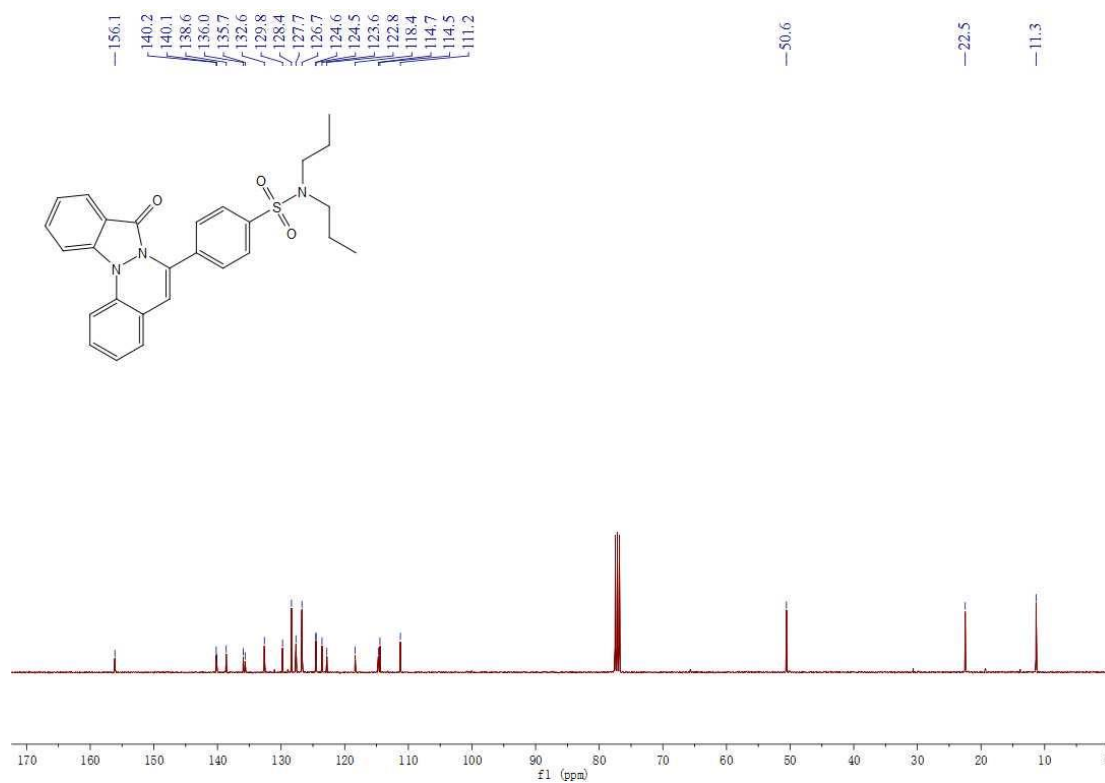

# 3r

<sup>1</sup>H NMR (400 MHz, CDCl<sub>3</sub>)

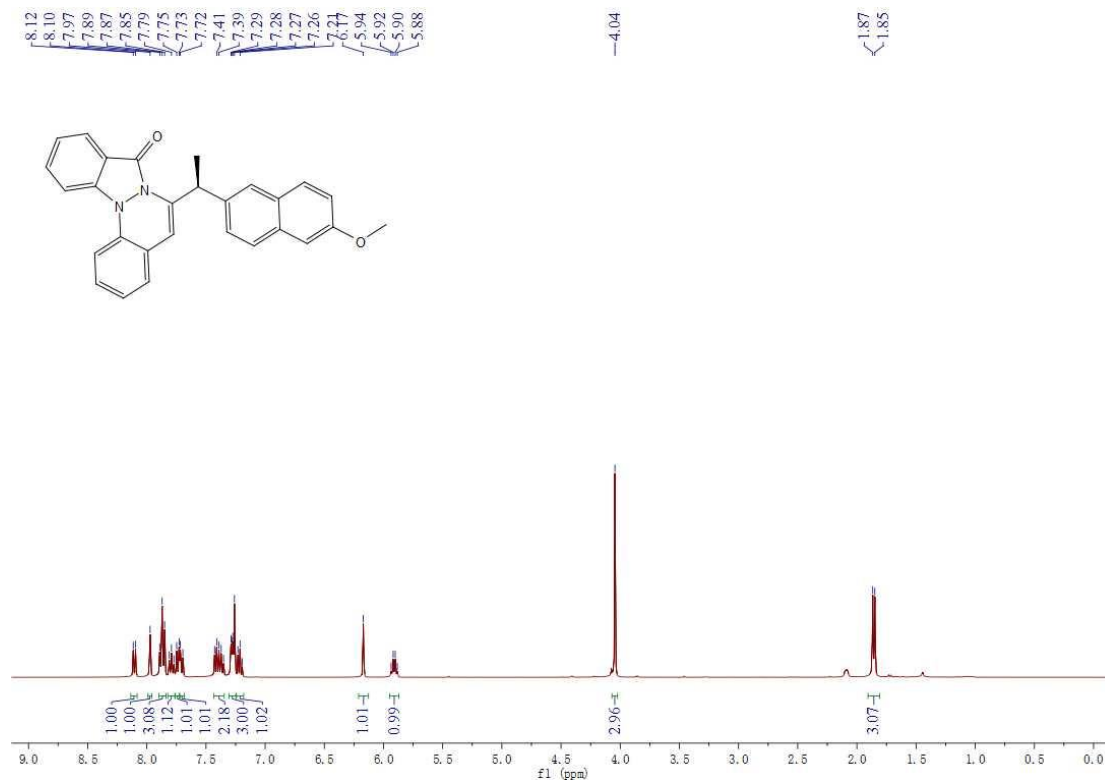

<sup>13</sup>C NMR (101 MHz, CDCl<sub>3</sub>)

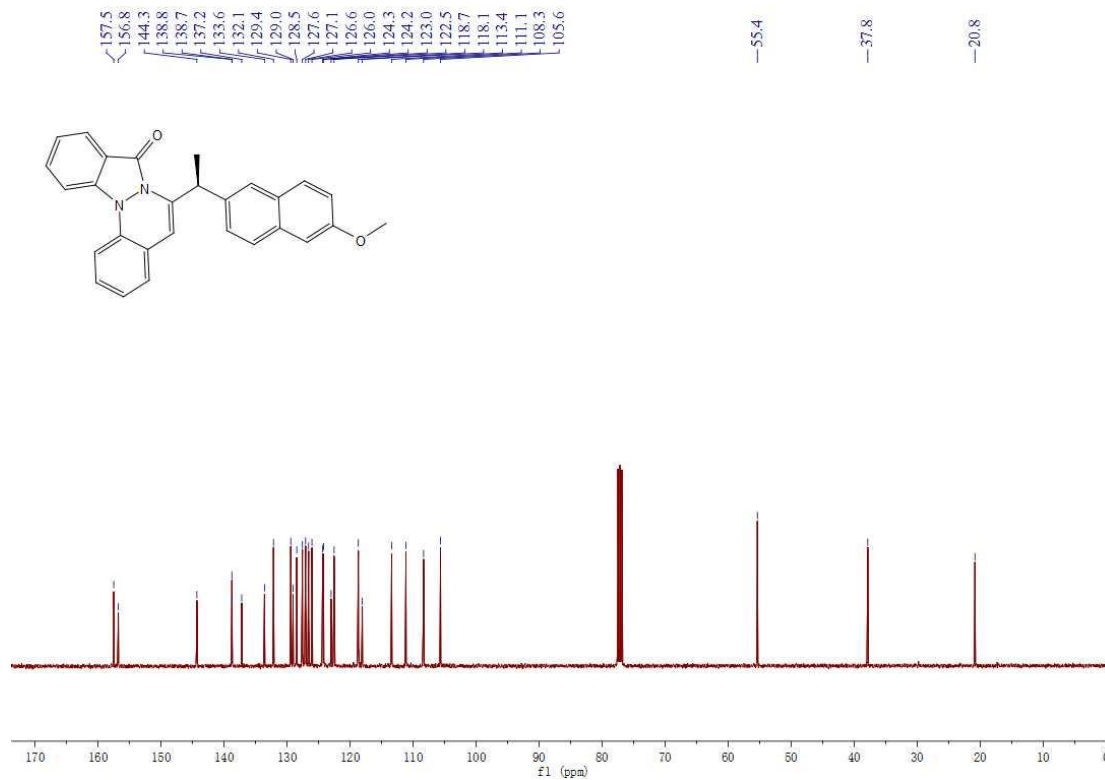

### 3s

<sup>1</sup>H NMR (400 MHz, CDCl<sub>3</sub>)

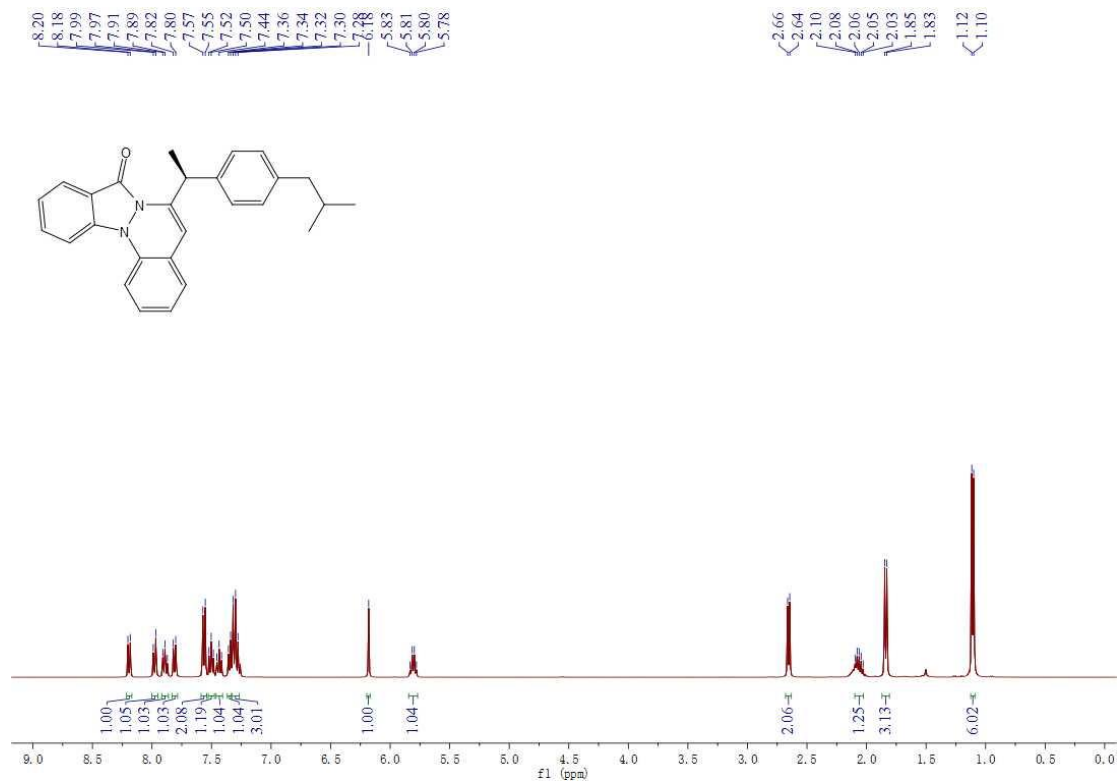

<sup>13</sup>C NMR (101 MHz, CDCl<sub>3</sub>)

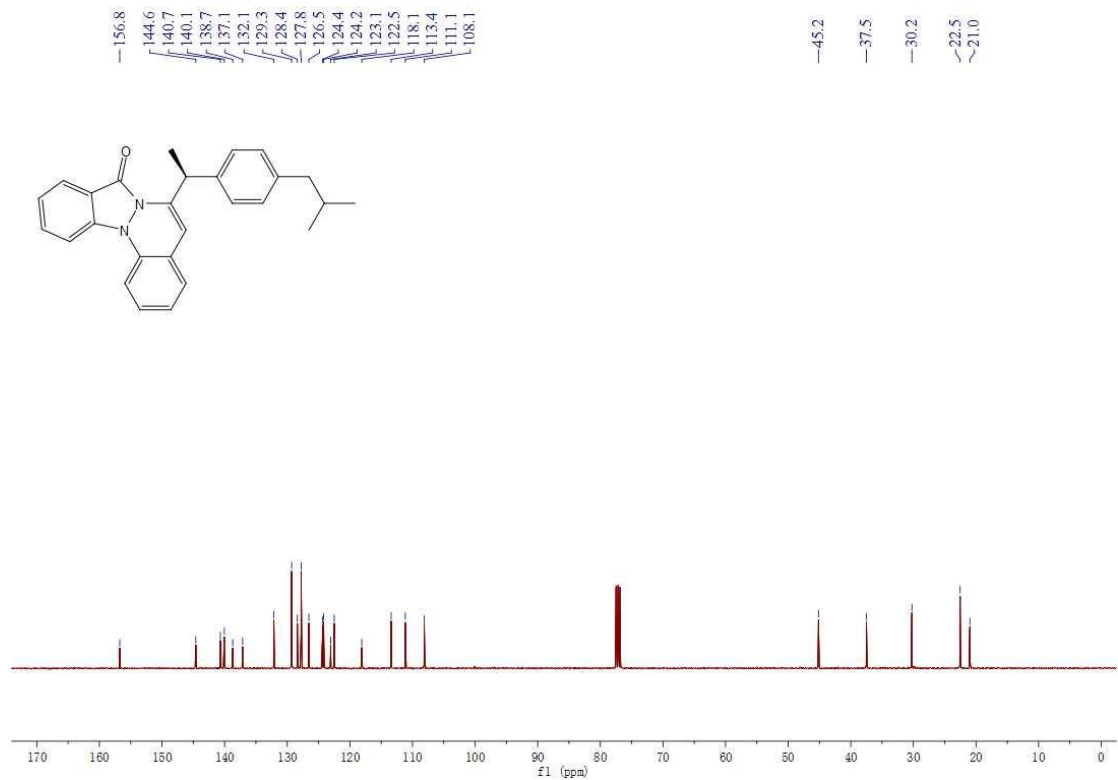

# 4a

<sup>1</sup>H NMR (400 MHz, CDCl<sub>3</sub>)

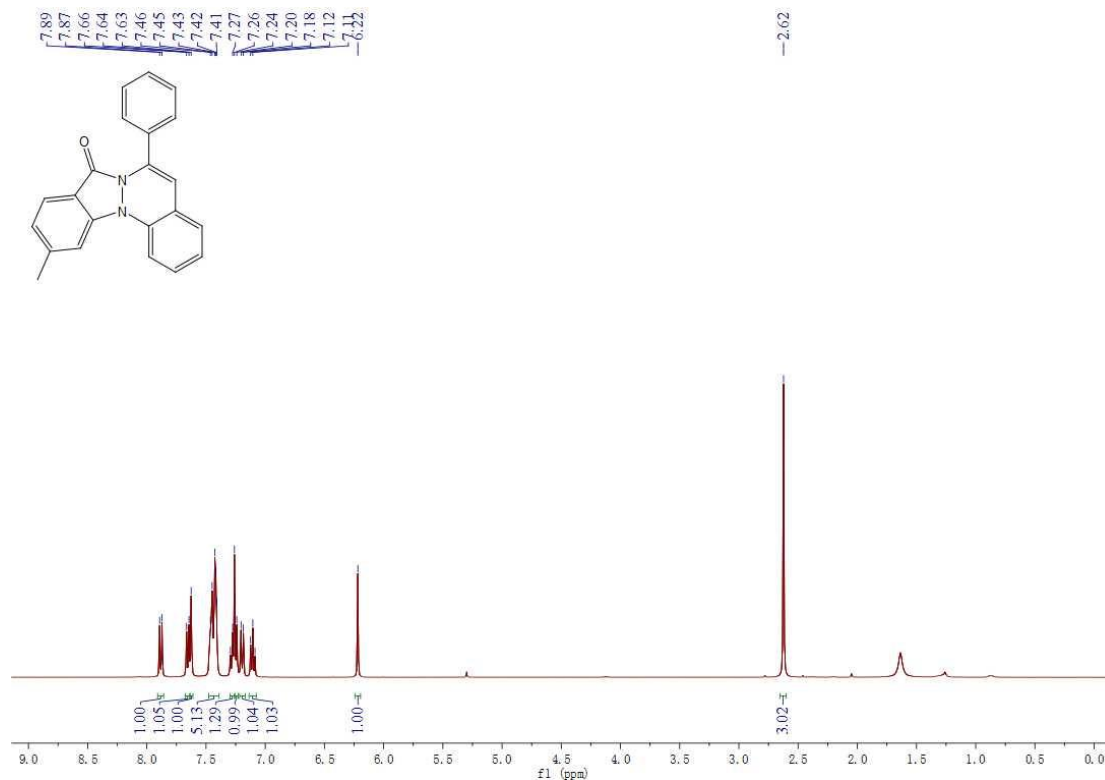

<sup>13</sup>C NMR (101 MHz, CDCl<sub>3</sub>)

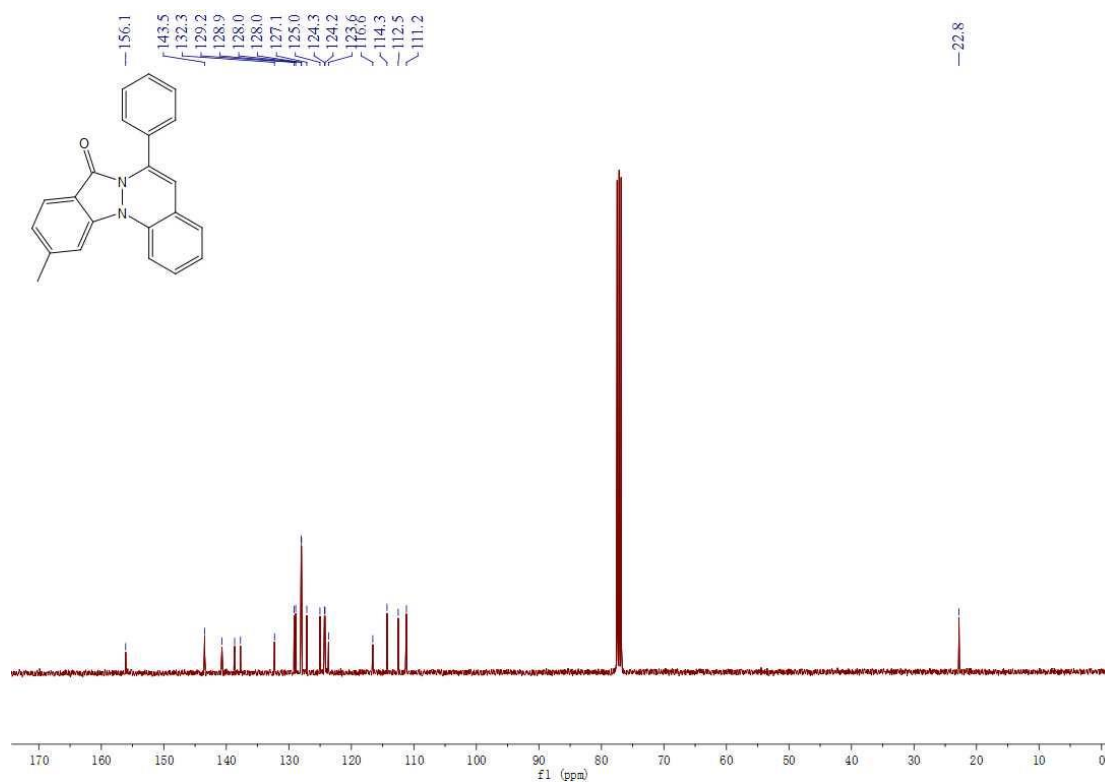

## 4b

<sup>1</sup>H NMR (400 MHz, CDCl<sub>3</sub>)

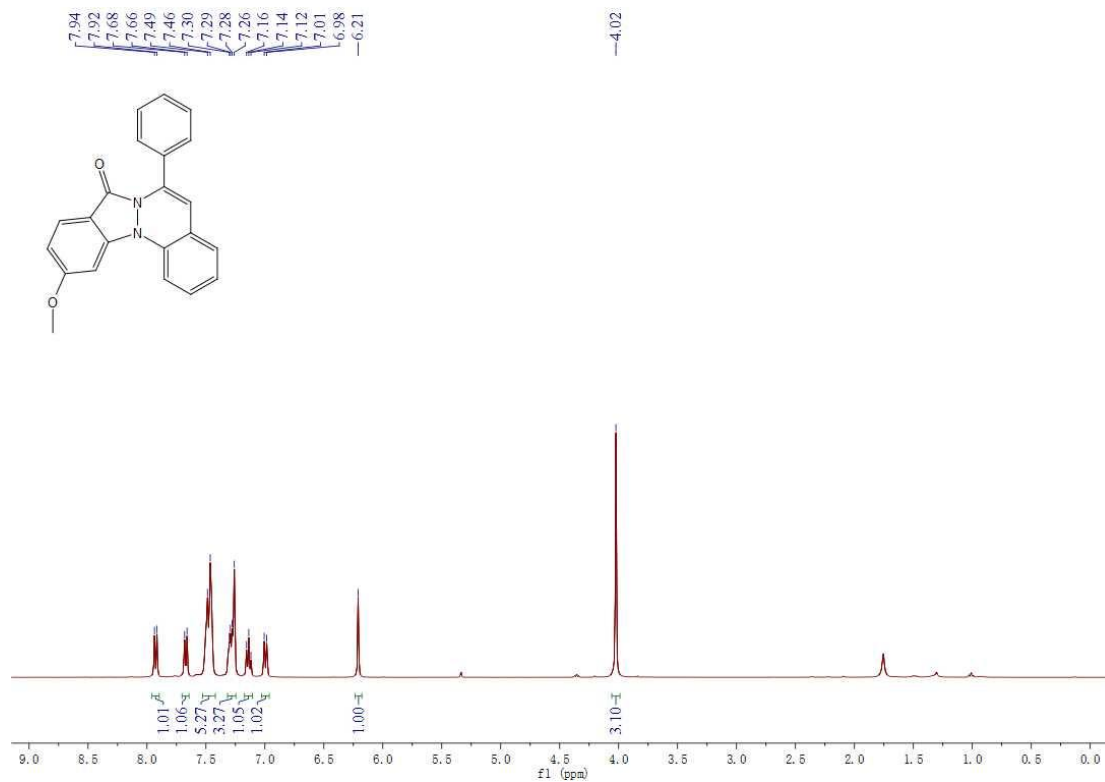

<sup>13</sup>C NMR (101 MHz, CDCl<sub>3</sub>)

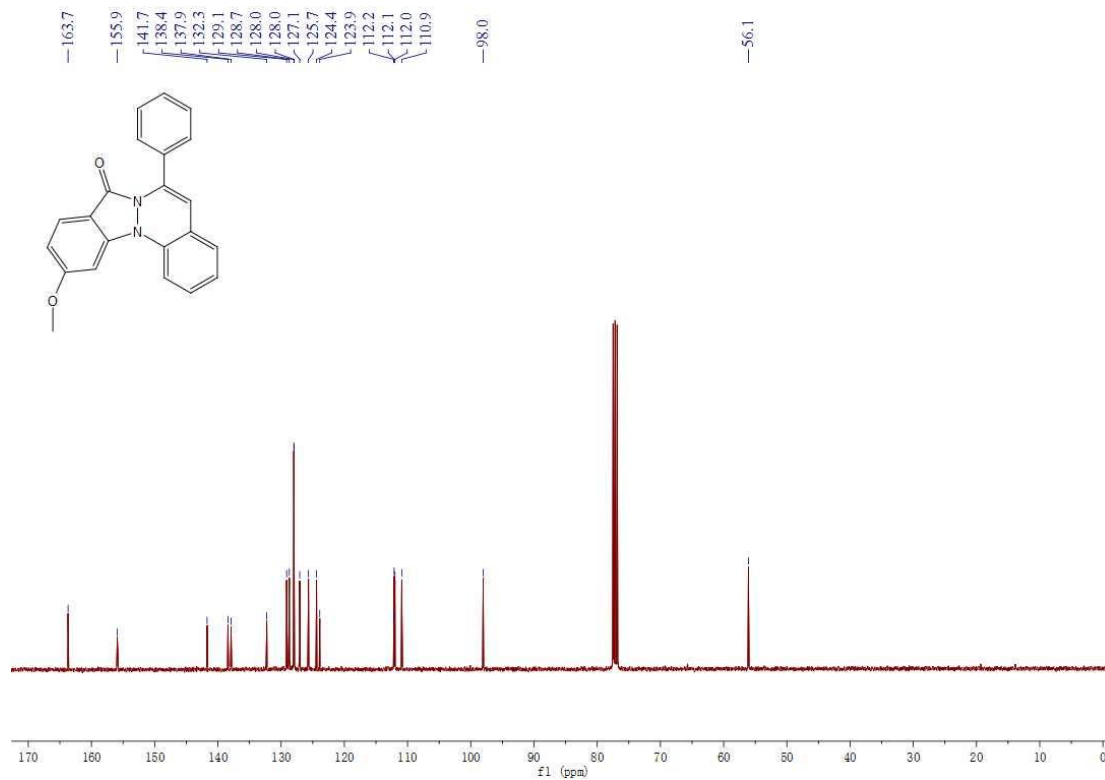

# 4c

<sup>1</sup>H NMR (400 MHz, CDCl<sub>3</sub>)

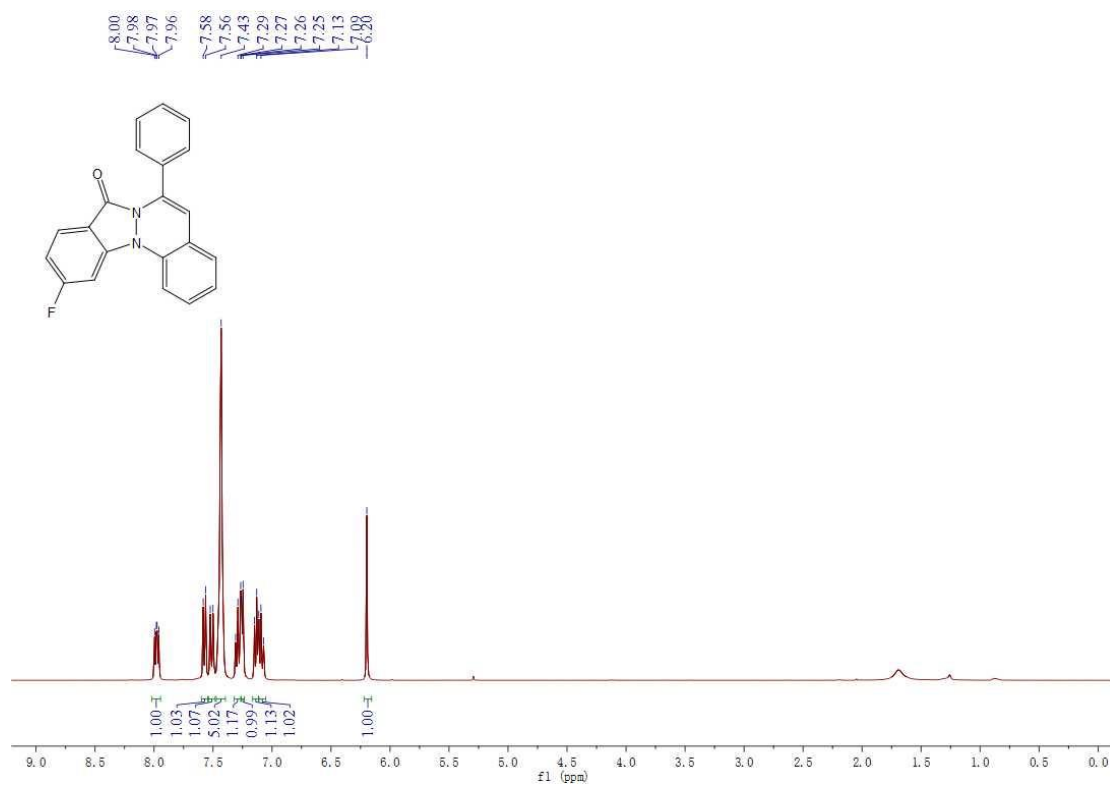

<sup>13</sup>C NMR (101 MHz, CDCl<sub>3</sub>)

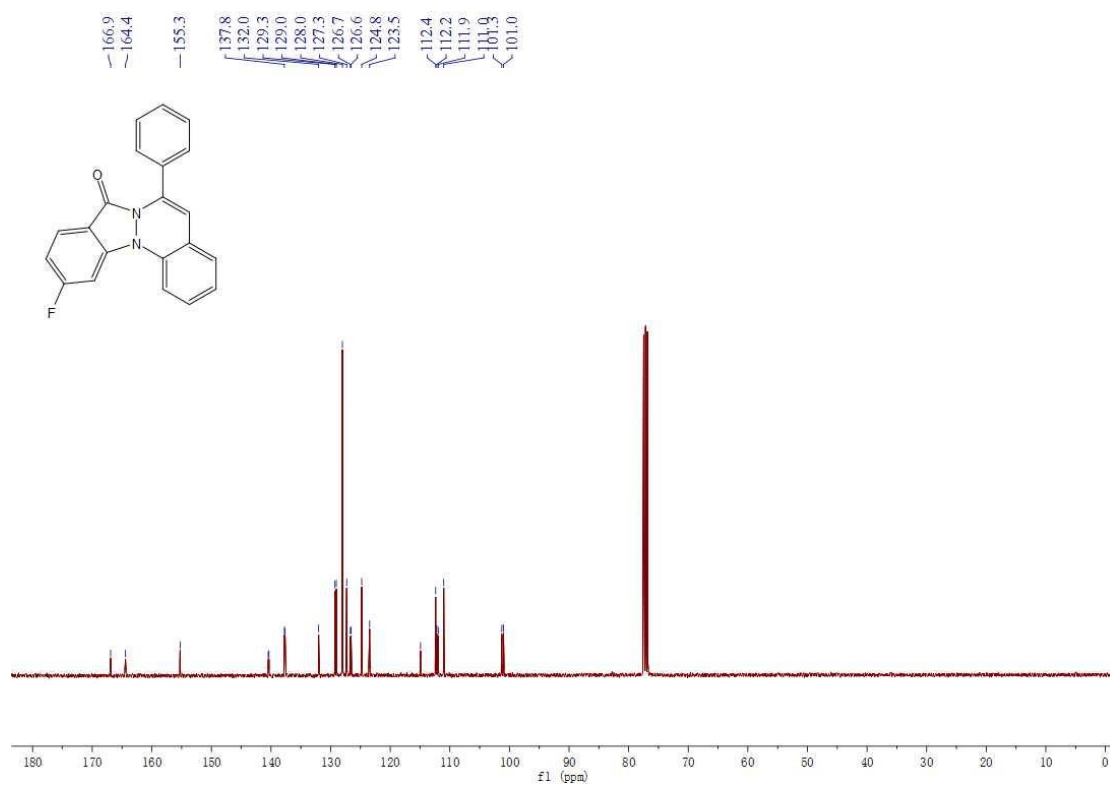

**$^{19}\text{F}$  NMR (376 MHz,  $\text{CDCl}_3$ )**

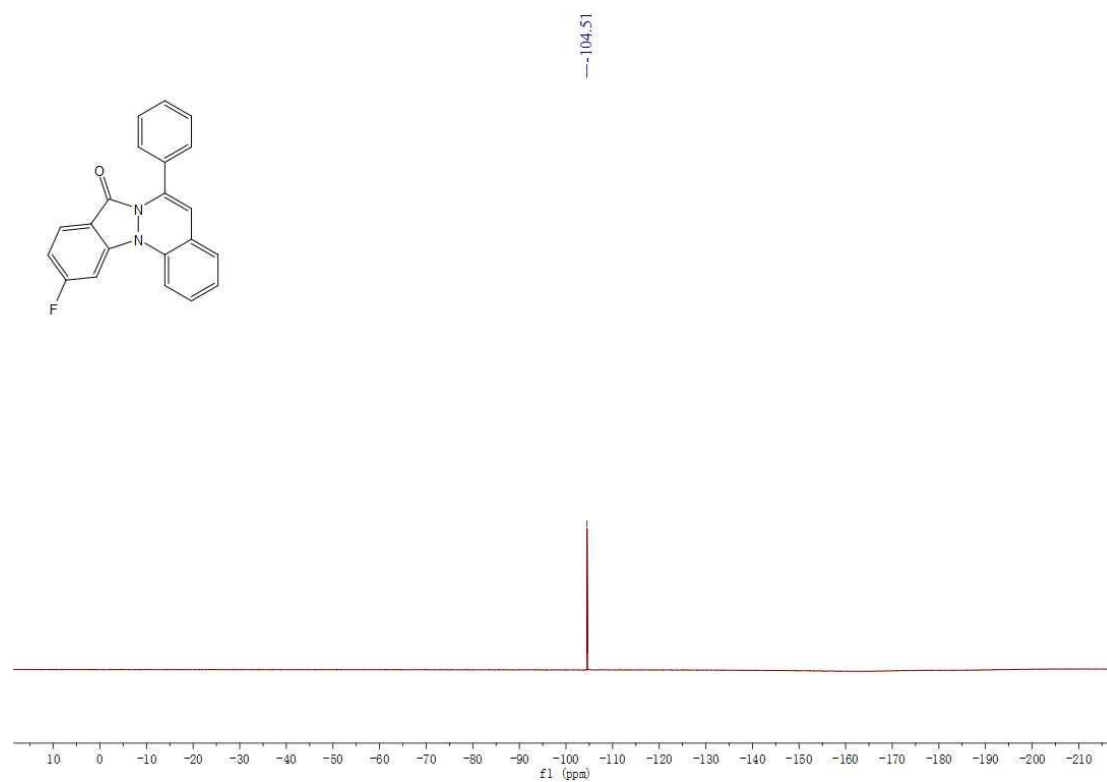



4d

$^1\text{H}$  NMR (400 MHz,  $\text{CDCl}_3$ )

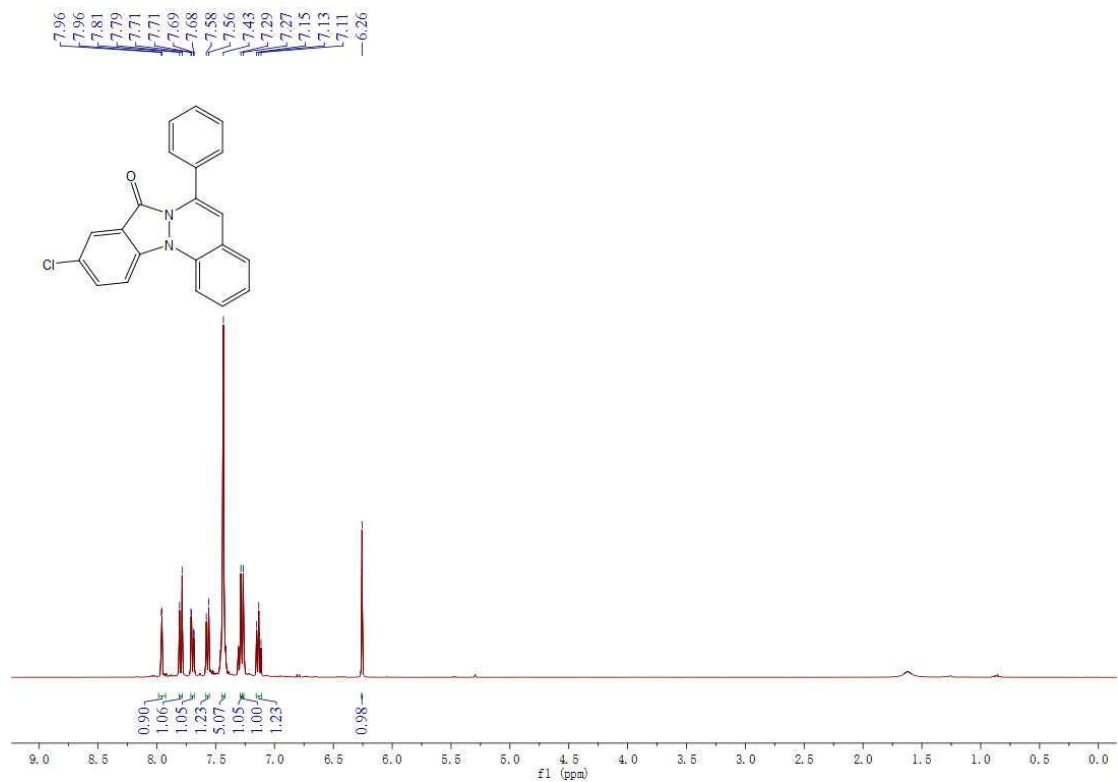

$^{13}\text{C}$  NMR (101 MHz,  $\text{CDCl}_3$ )

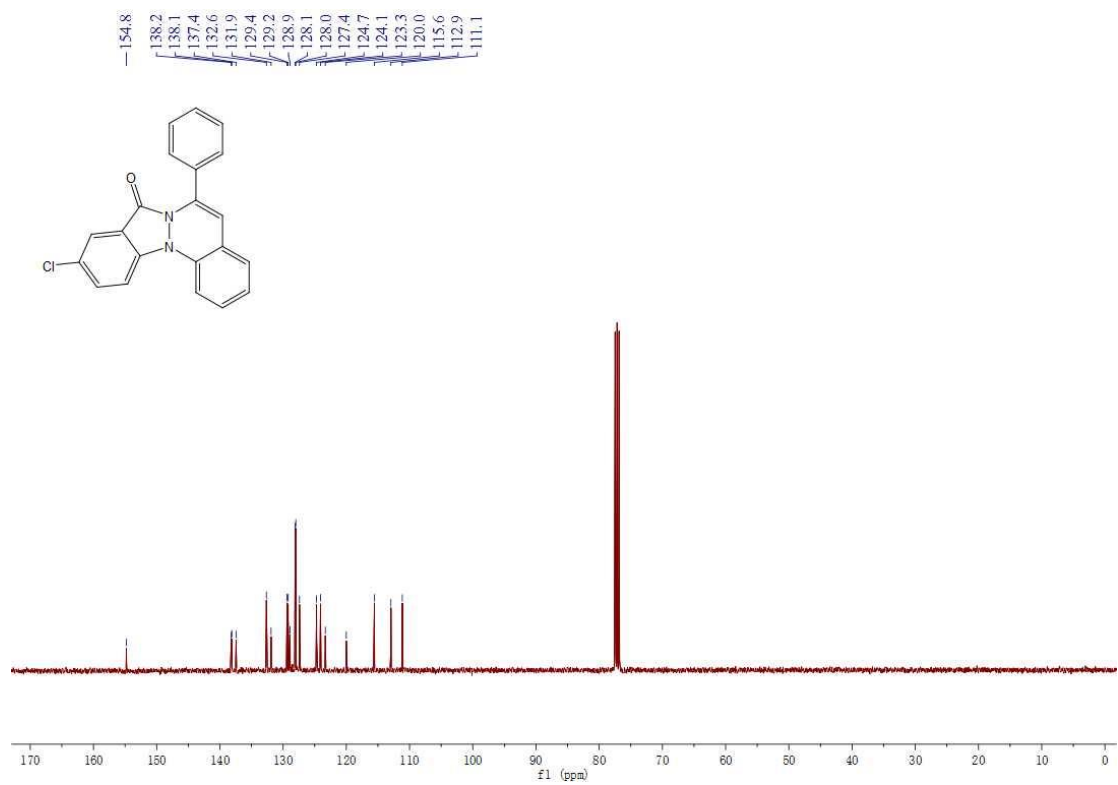

# 4e

<sup>1</sup>H NMR (400 MHz, CDCl<sub>3</sub>)

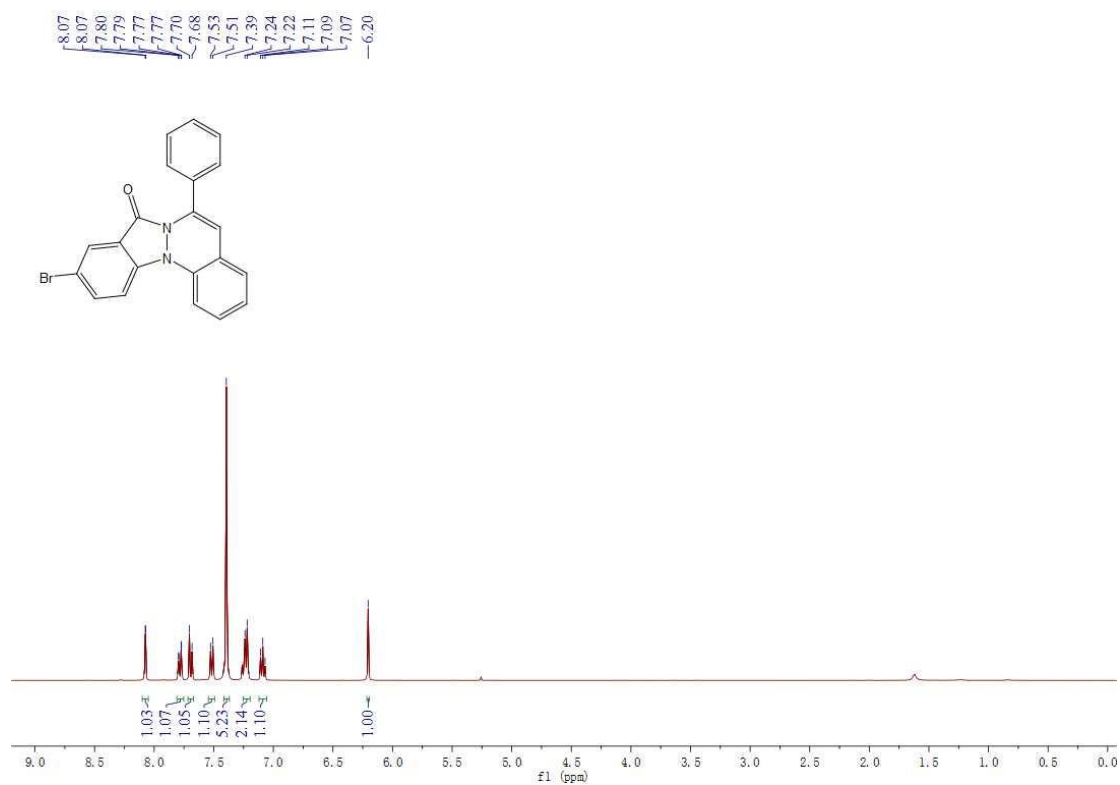

<sup>13</sup>C NMR (101 MHz, CDCl<sub>3</sub>)

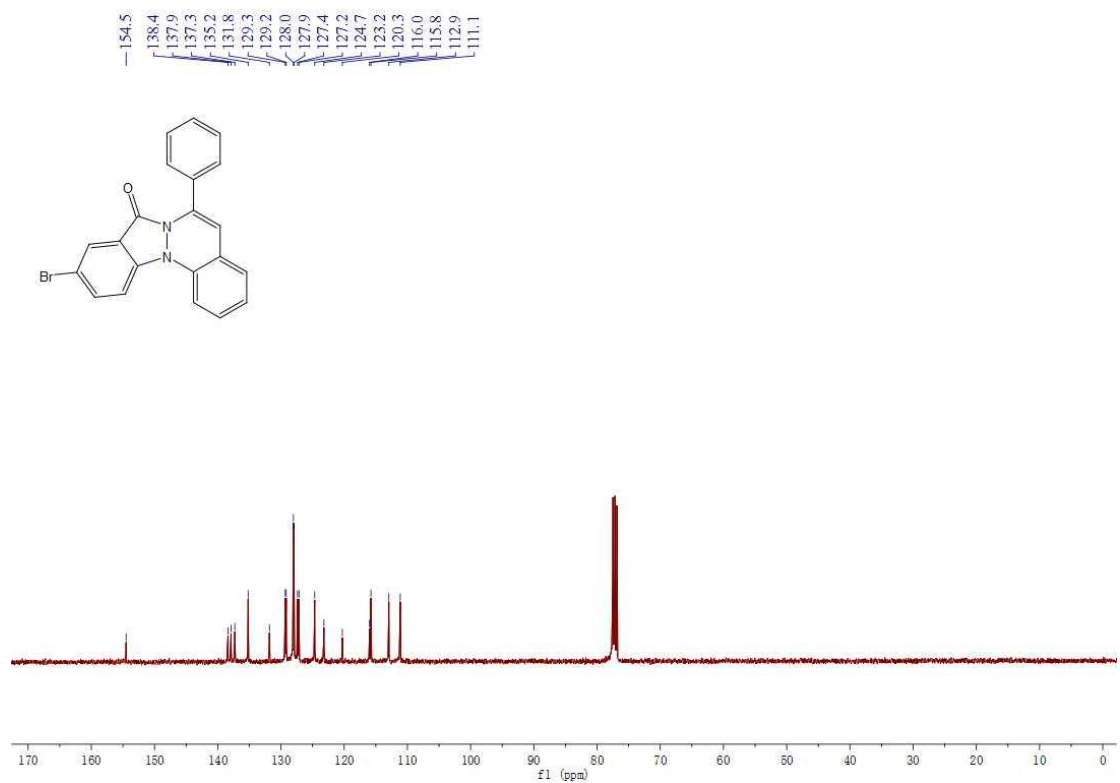

# 4f

<sup>1</sup>H NMR (400 MHz, CDCl<sub>3</sub>)

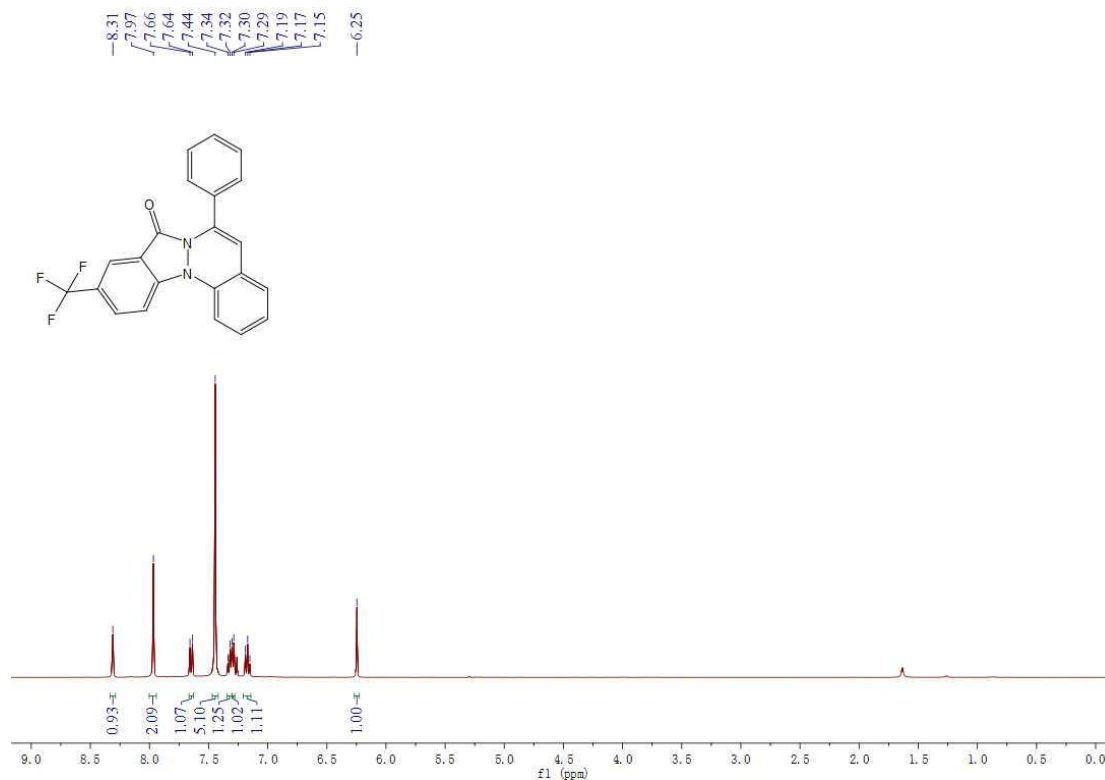

<sup>13</sup>C NMR (101 MHz, CDCl<sub>3</sub>)

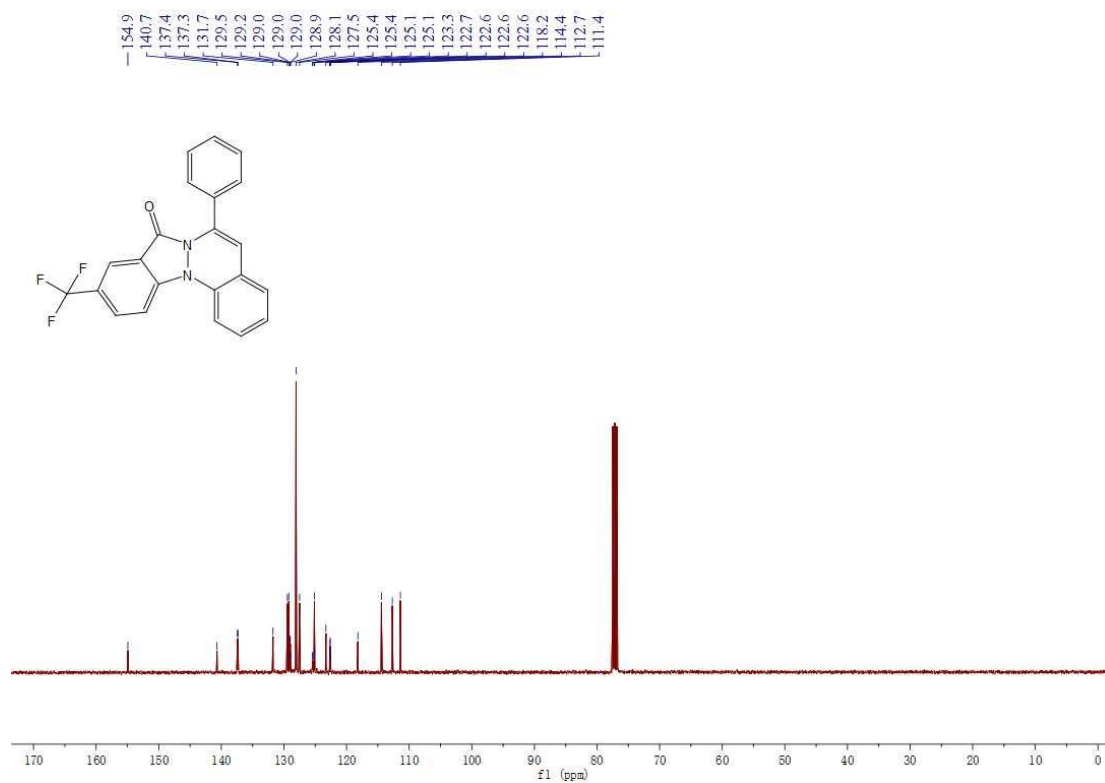

**<sup>19</sup>F NMR (376 MHz, CDCl<sub>3</sub>)**

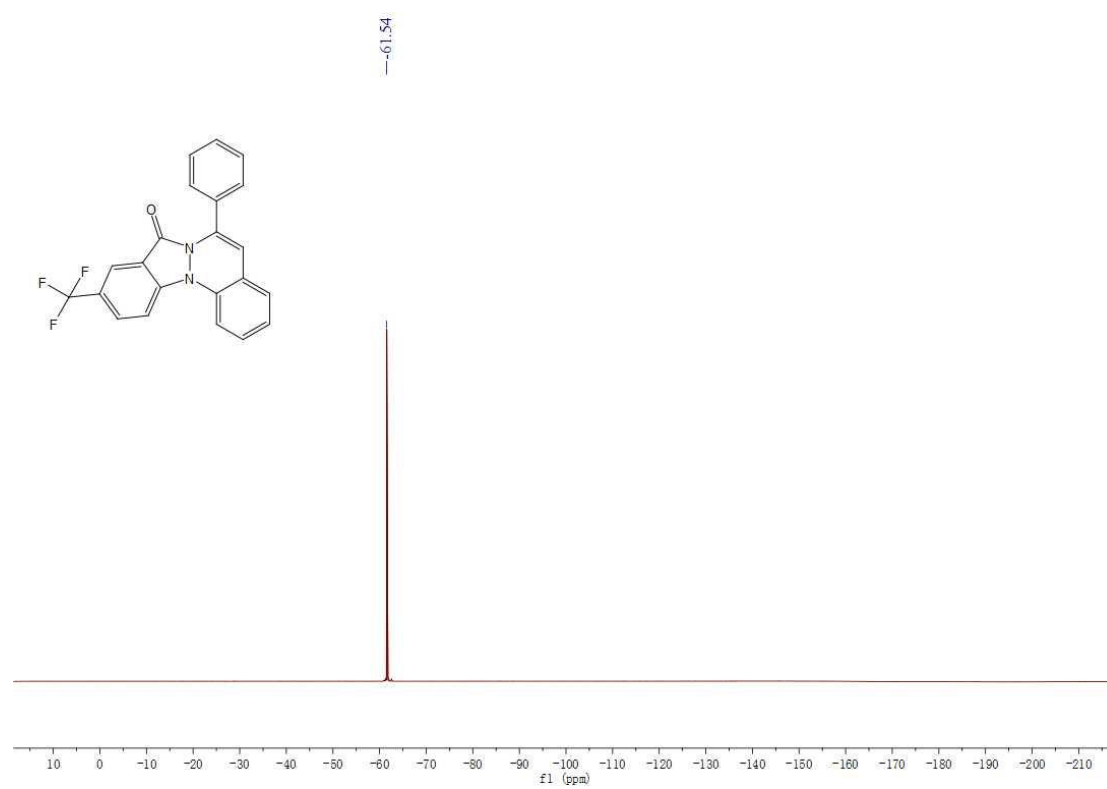

4g

$^1\text{H}$  NMR (400 MHz,  $\text{CDCl}_3$ )

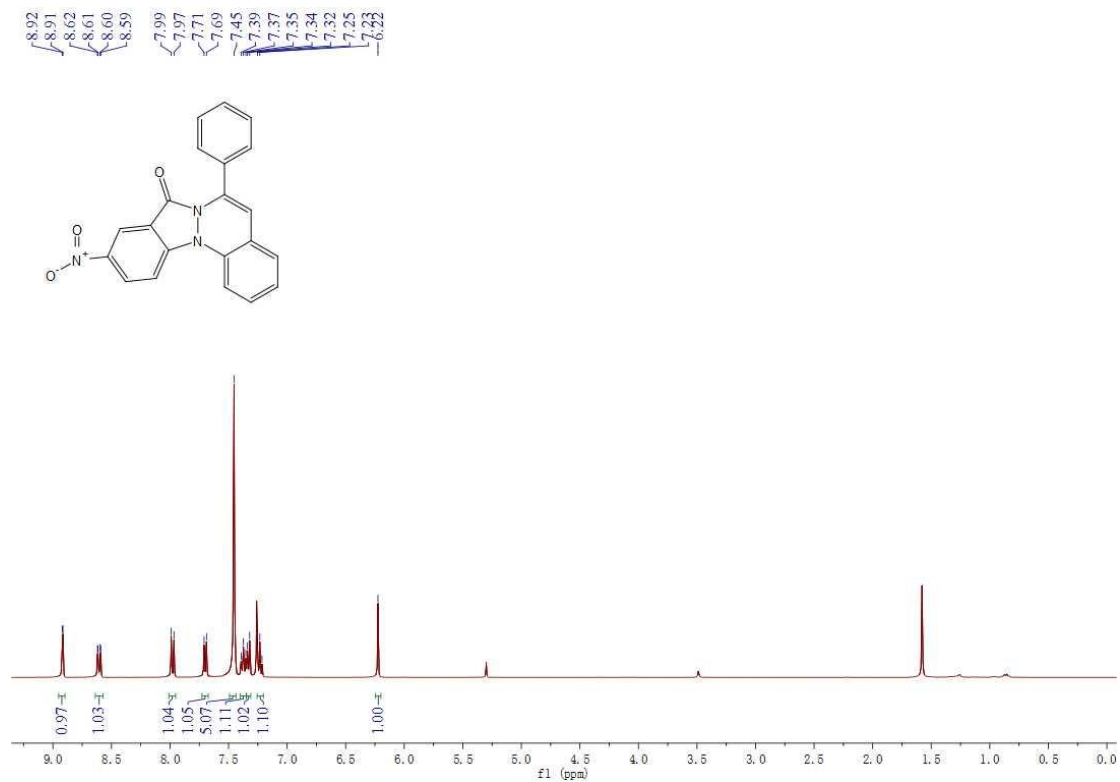

$^{13}\text{C}$  NMR (101 MHz,  $\text{CDCl}_3$ )

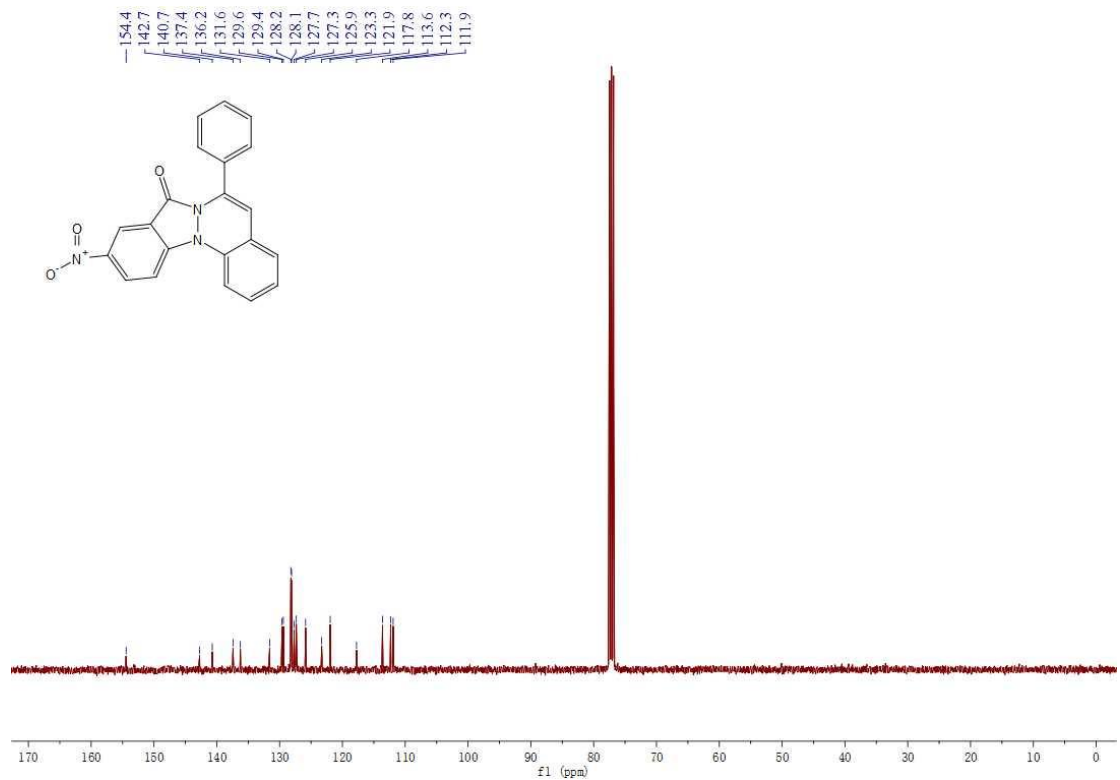

# 4h

## <sup>1</sup>H NMR (400 MHz, CDCl<sub>3</sub>)

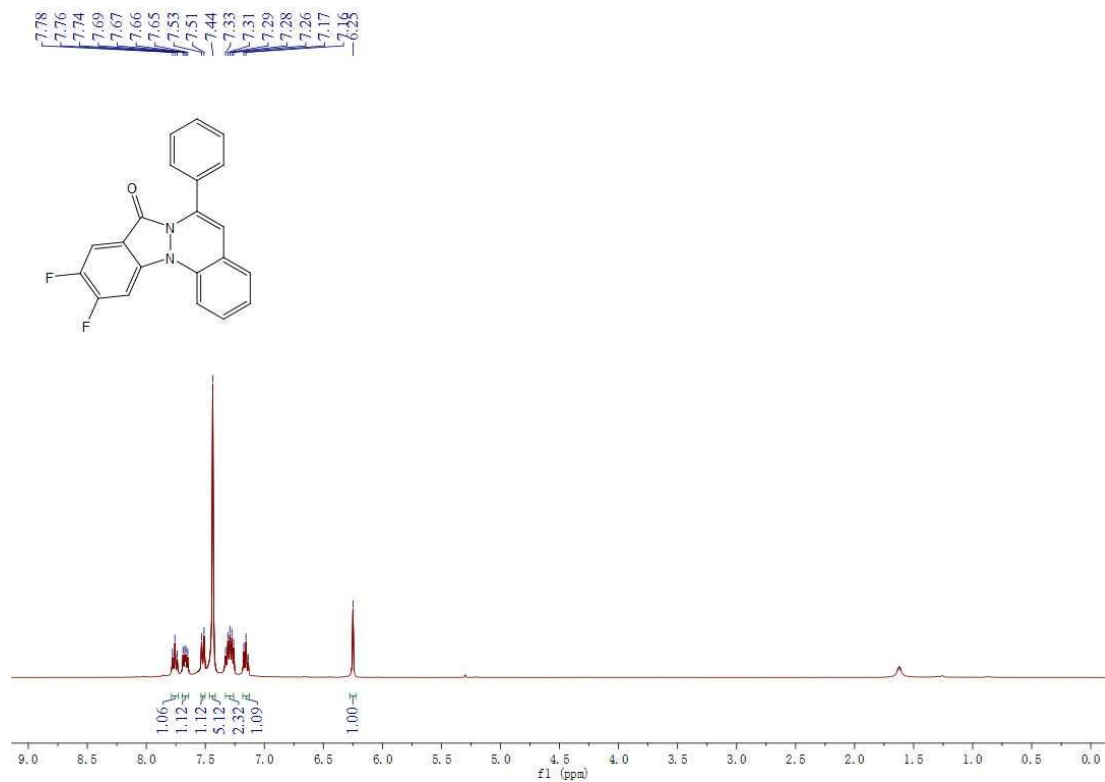

## <sup>13</sup>C NMR (101 MHz, CDCl<sub>3</sub>)

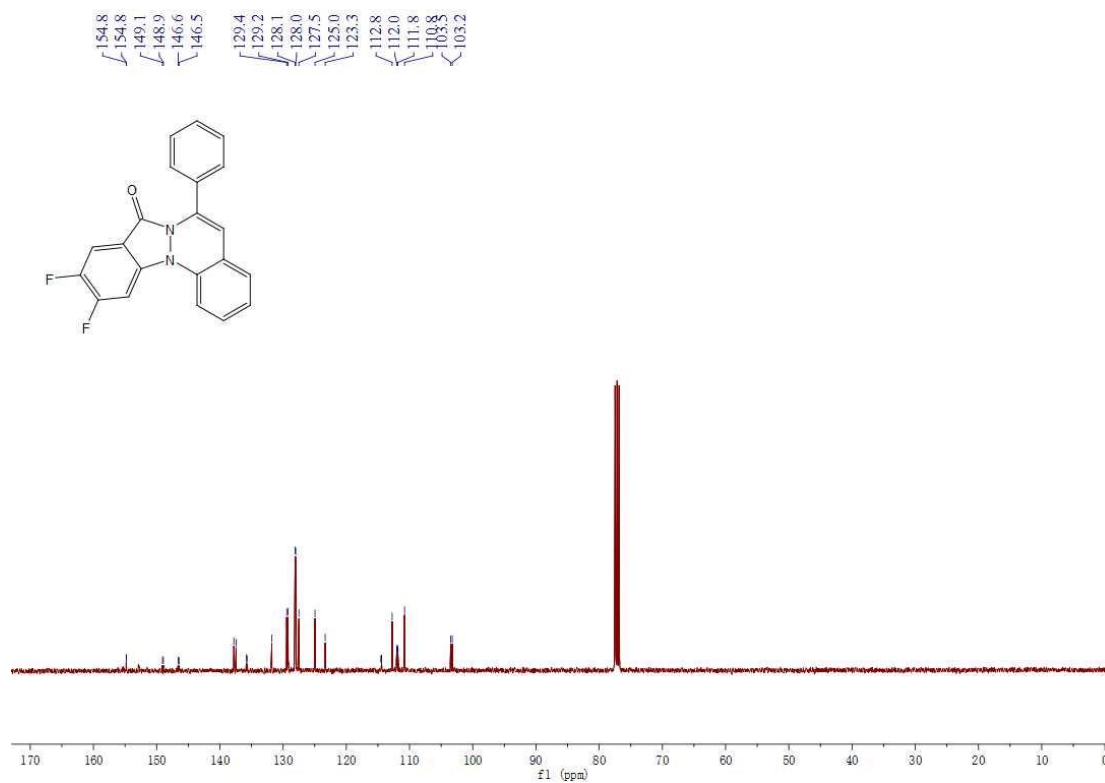

**<sup>19</sup>F NMR (376 MHz, CDCl<sub>3</sub>)**

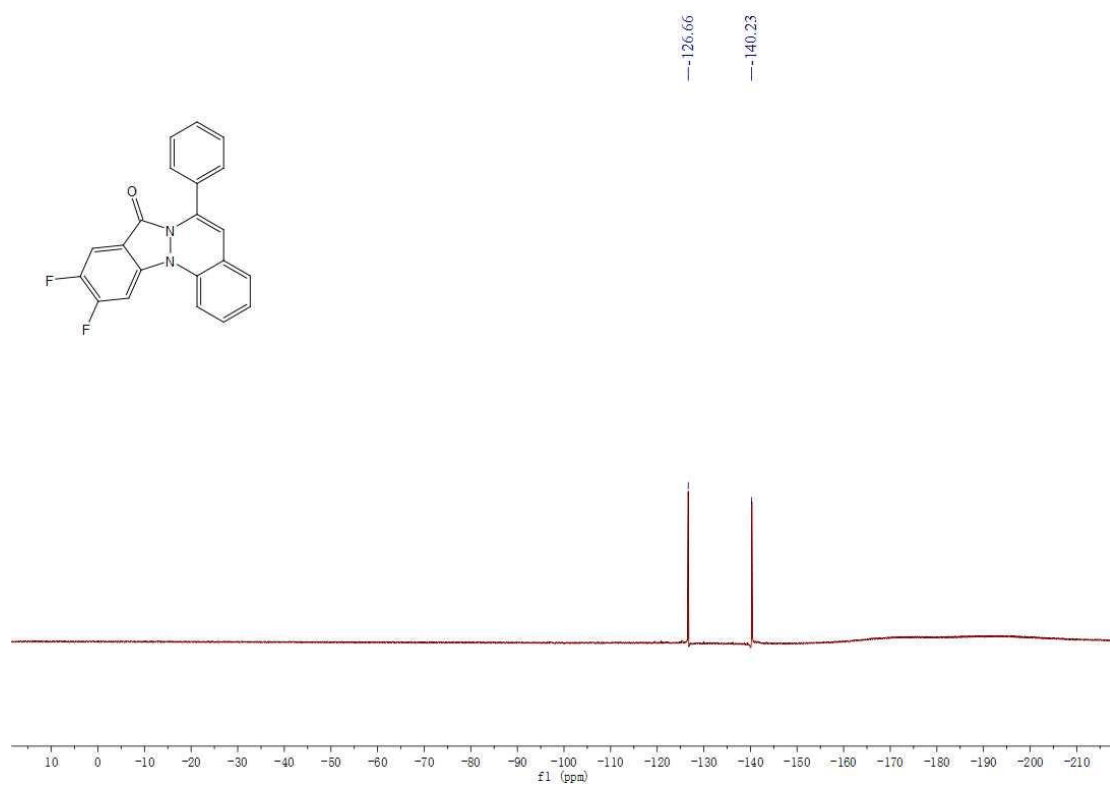

# 4i

## <sup>1</sup>H NMR (400 MHz, CDCl<sub>3</sub>)

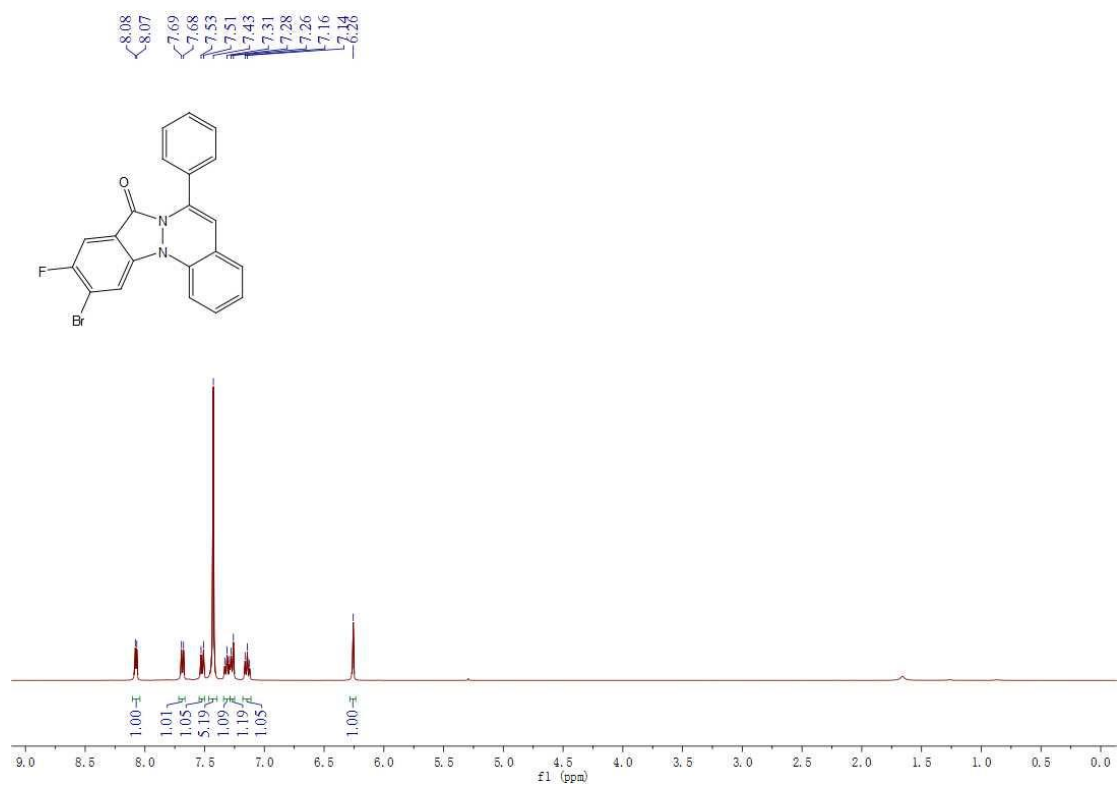

## <sup>13</sup>C NMR (101 MHz, CDCl<sub>3</sub>)

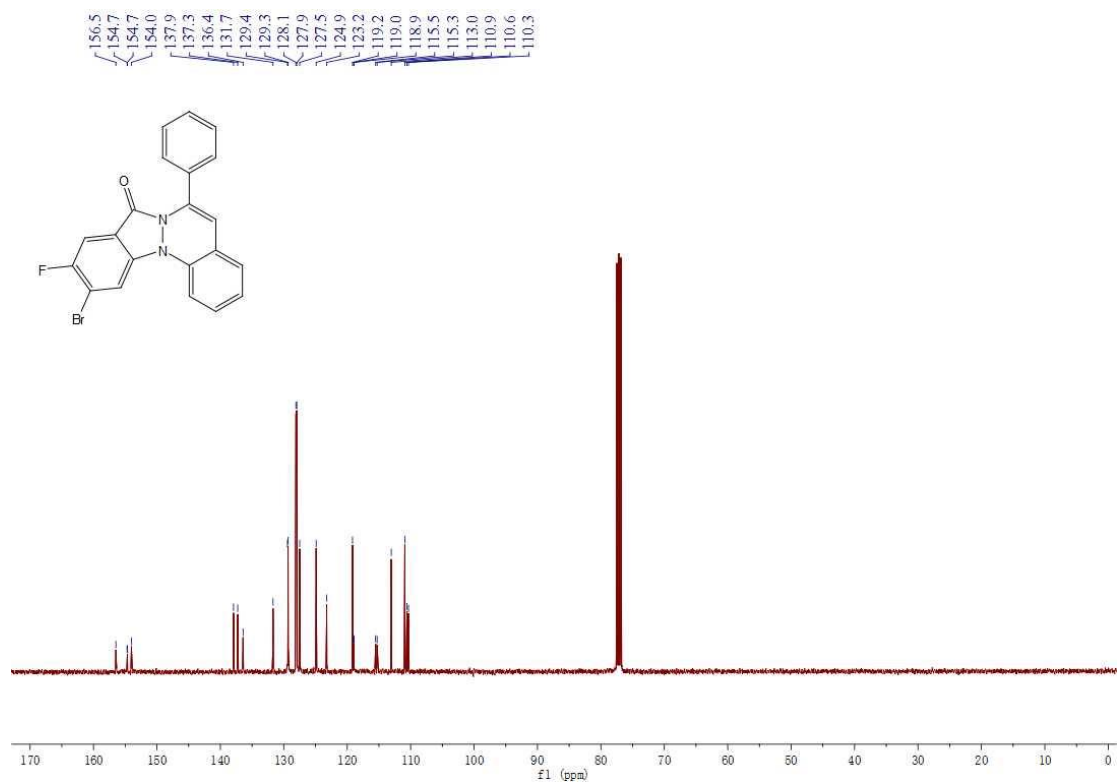



**<sup>19</sup>F NMR (376 MHz, CDCl<sub>3</sub>)**

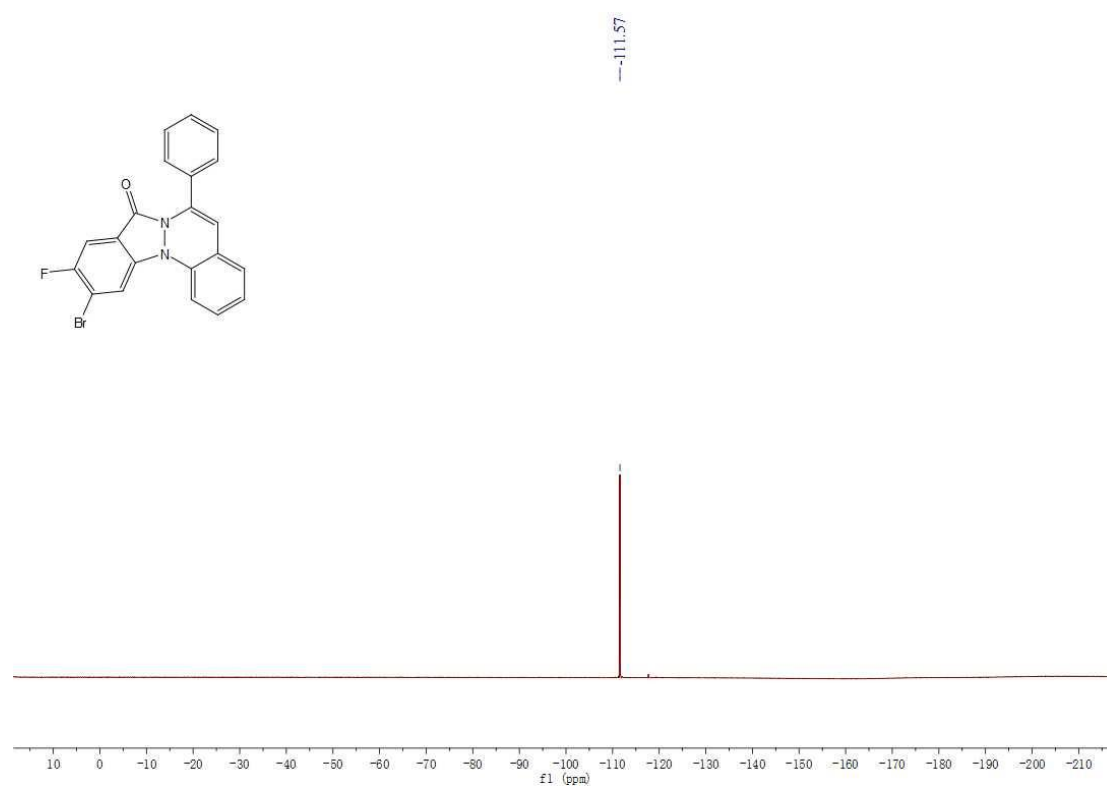

4j

$^1\text{H}$  NMR (400 MHz,  $\text{CDCl}_3$ )

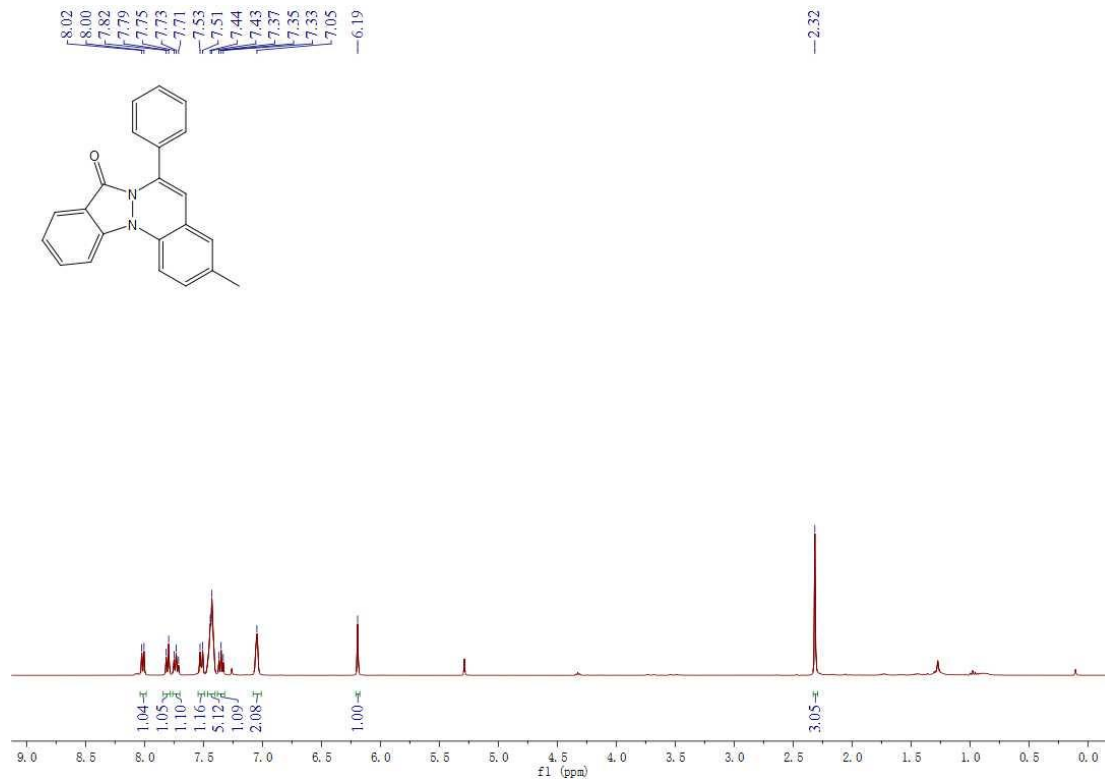

$^{13}\text{C}$  NMR (101 MHz,  $\text{CDCl}_3$ )

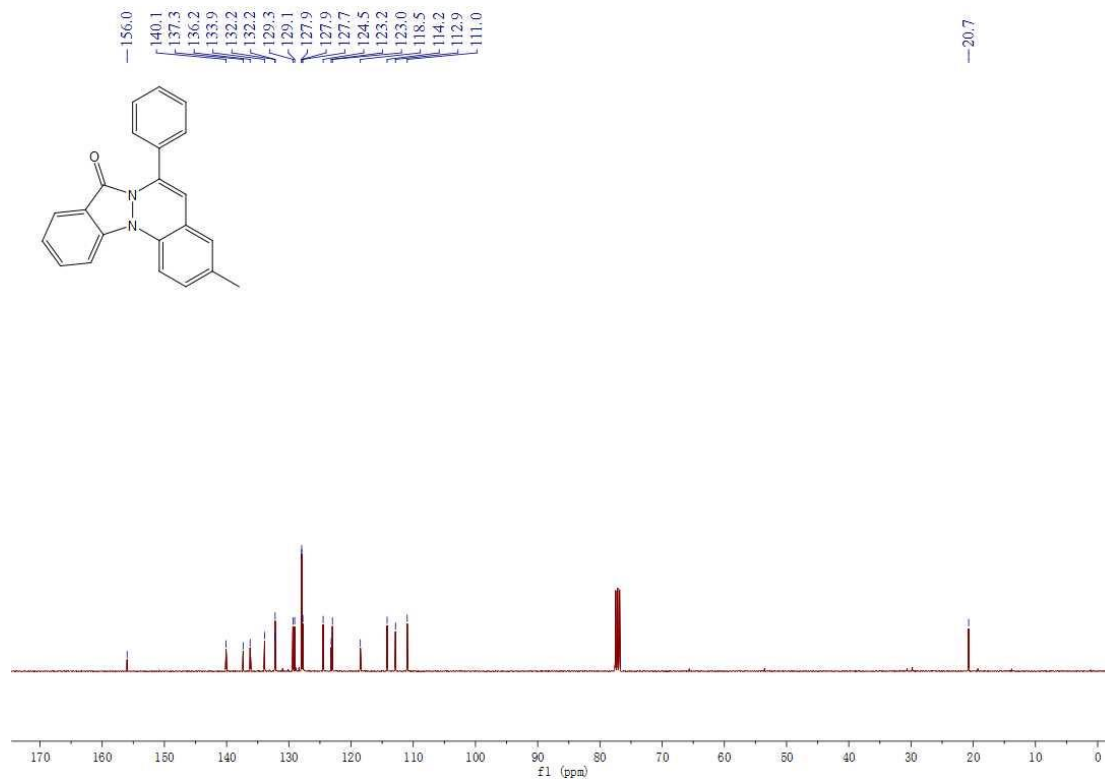

# 4k

<sup>1</sup>H NMR (400 MHz, CDCl<sub>3</sub>)

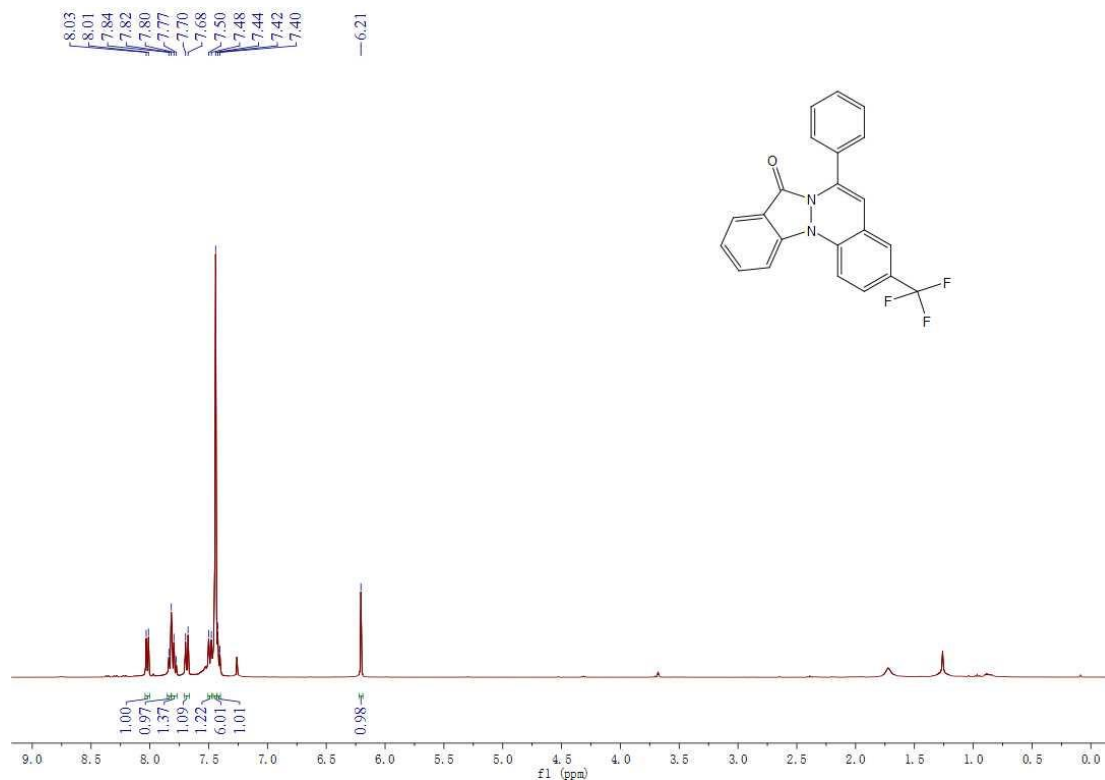

<sup>13</sup>C NMR (101 MHz, CDCl<sub>3</sub>)

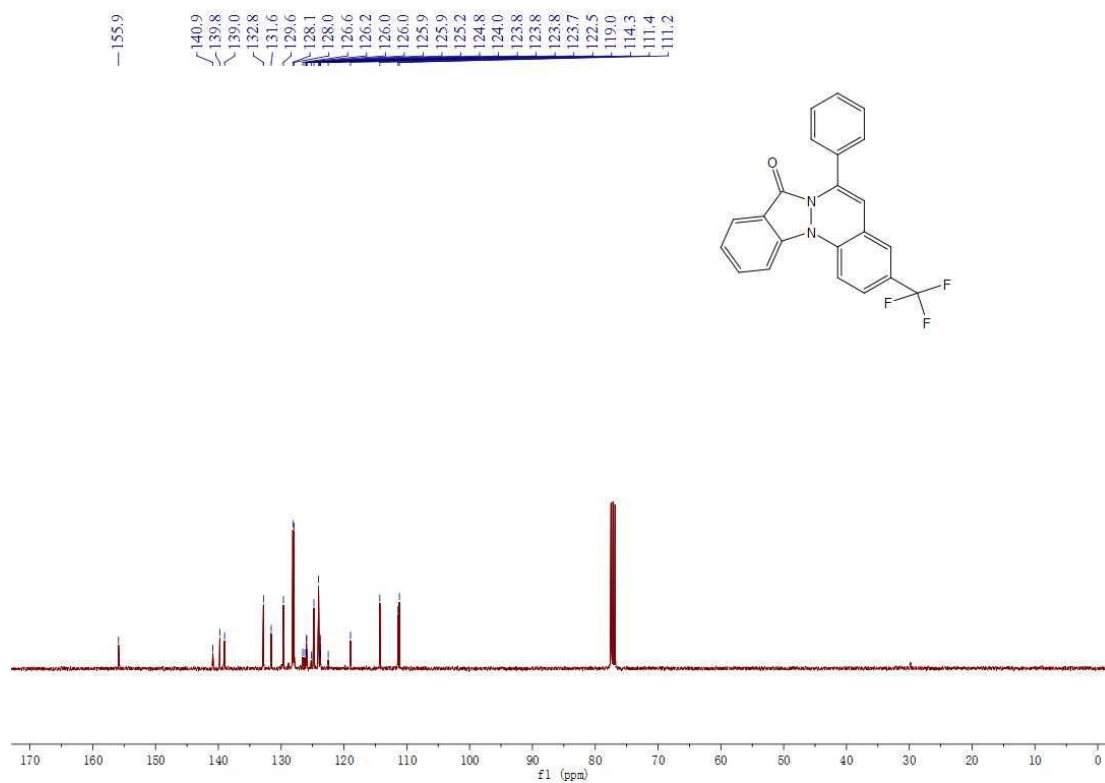

**<sup>19</sup>F NMR (376 MHz, CDCl<sub>3</sub>)**

—62.38

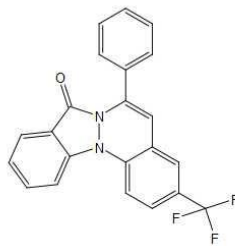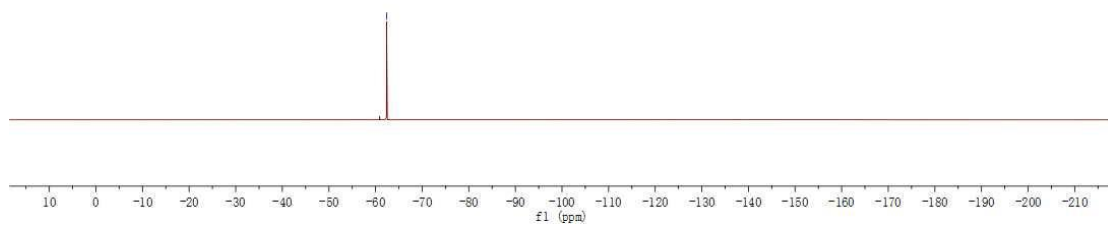

**<sup>1</sup>H NMR (400 MHz, CDCl<sub>3</sub>)**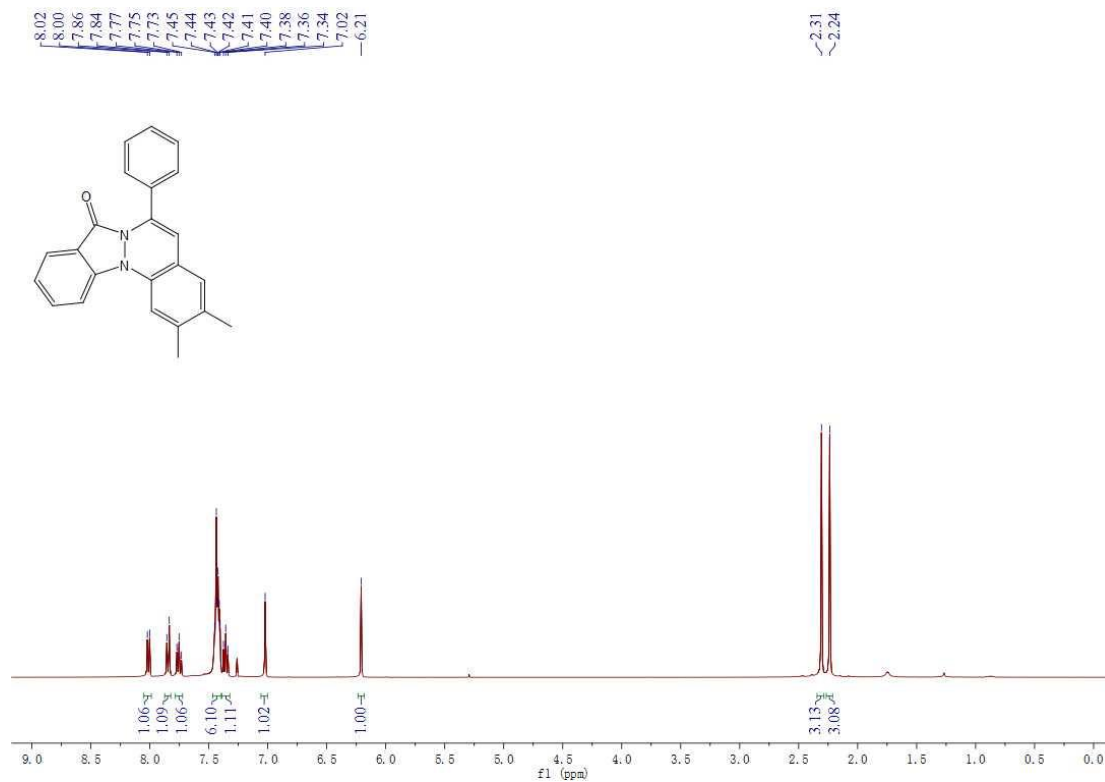**<sup>13</sup>C NMR (101 MHz, CDCl<sub>3</sub>)**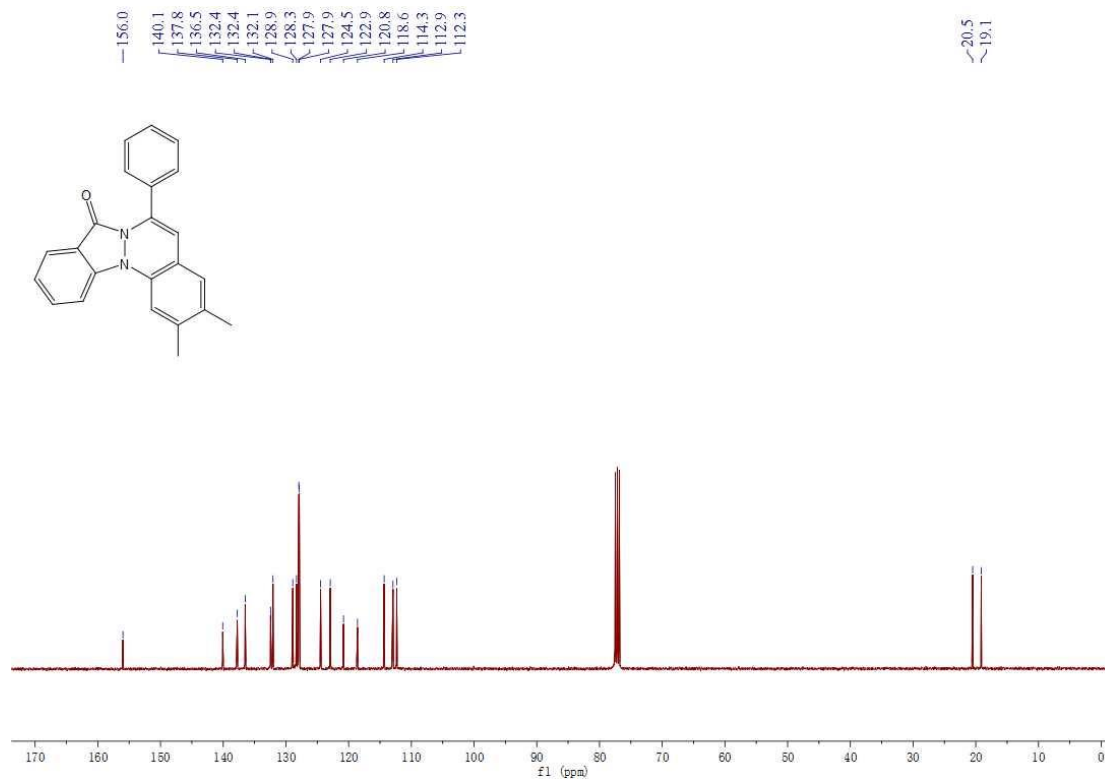

# 4m

<sup>1</sup>H NMR (400 MHz, CDCl<sub>3</sub>)

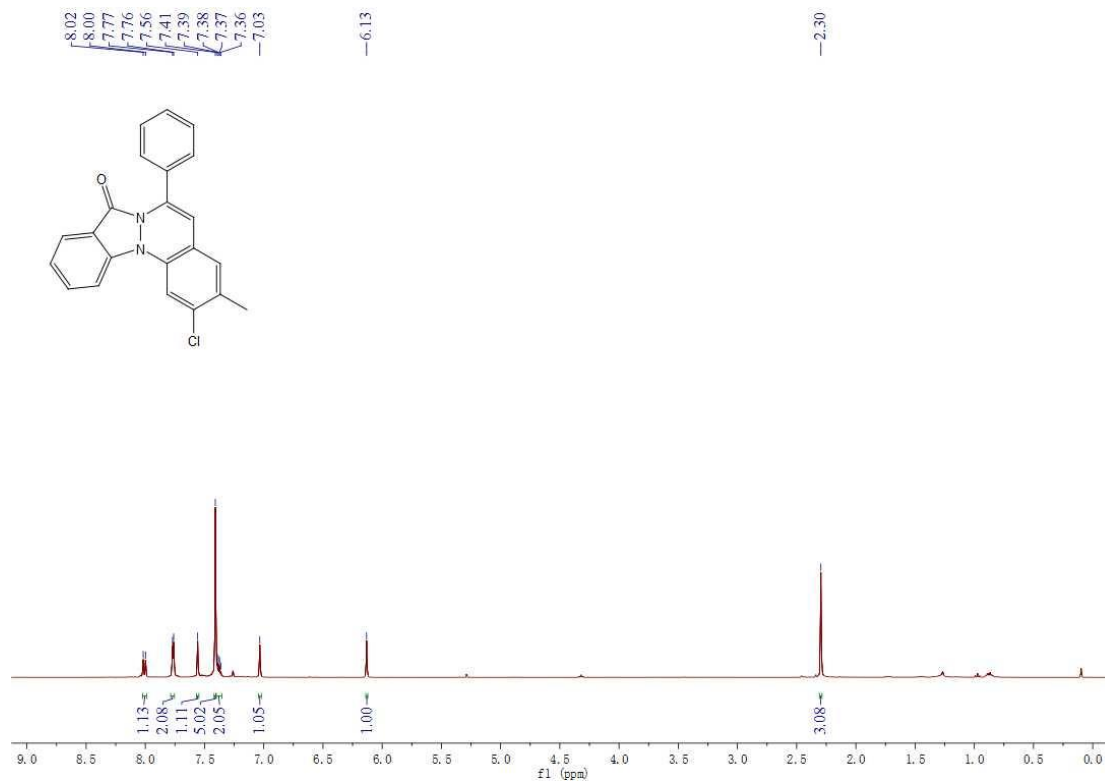

<sup>13</sup>C NMR (101 MHz, CDCl<sub>3</sub>)

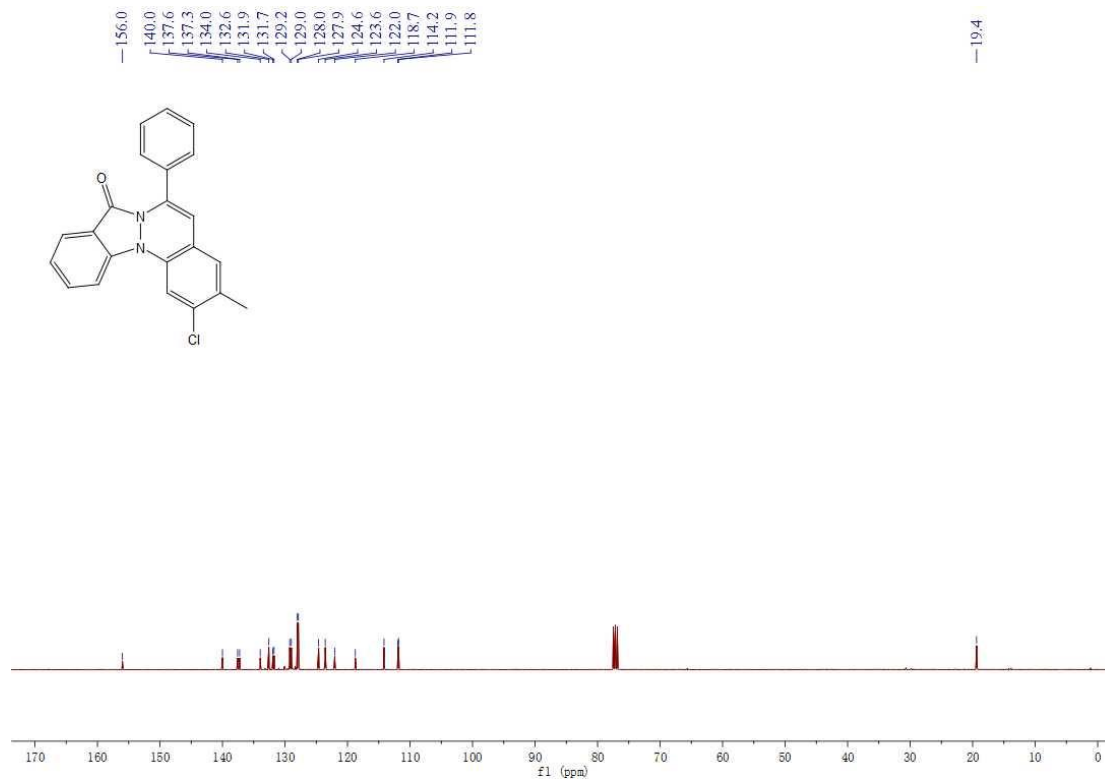

# 4n

<sup>1</sup>H NMR (400 MHz, CDCl<sub>3</sub>)

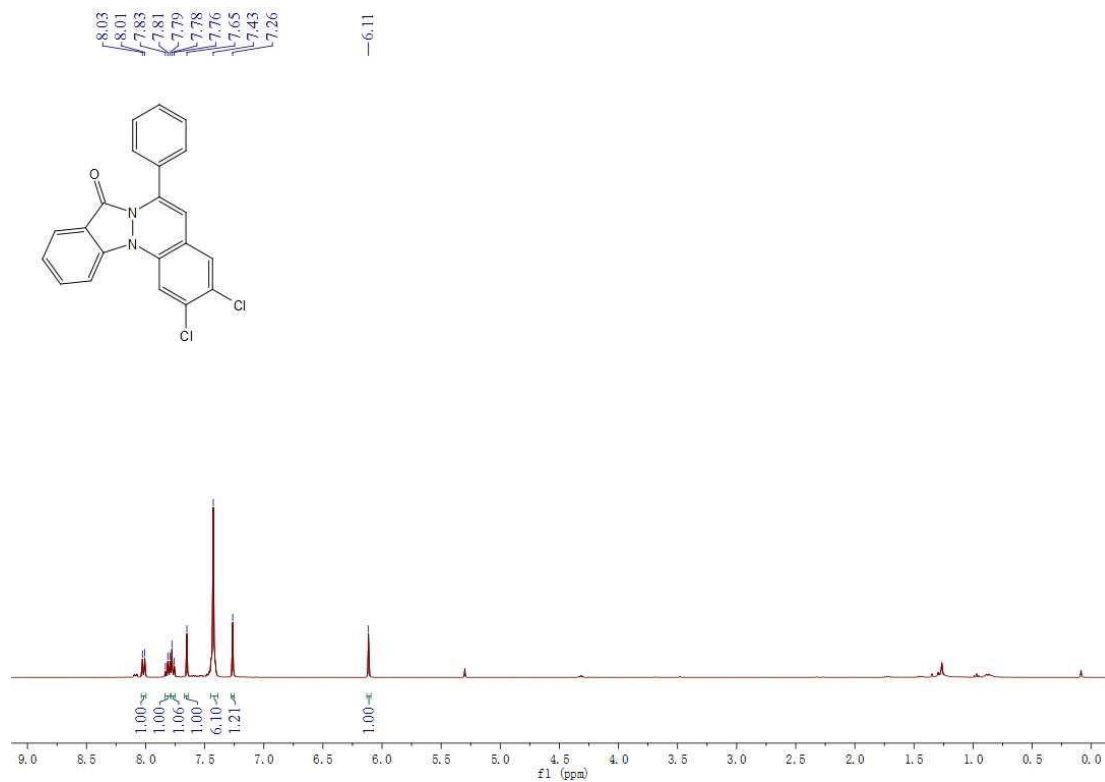

<sup>13</sup>C NMR (101 MHz, CDCl<sub>3</sub>)

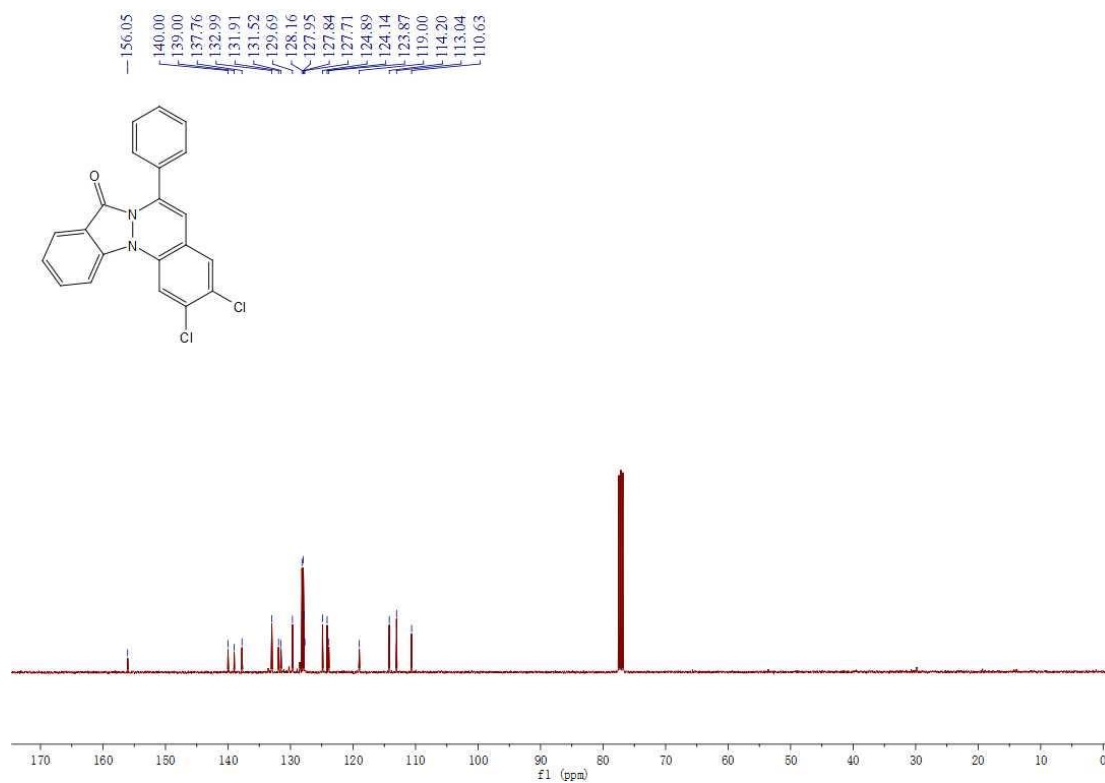

# 4o

## <sup>1</sup>H NMR (400 MHz, DMSO)

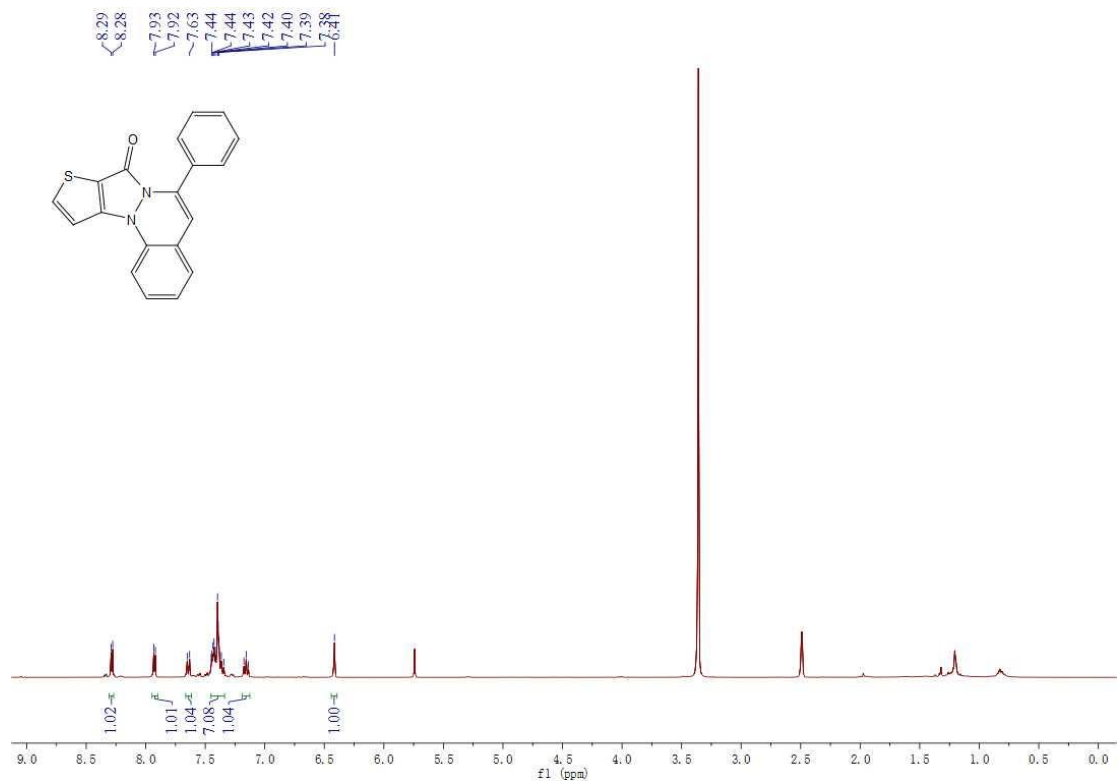

## <sup>13</sup>C NMR (101 MHz, DMSO)

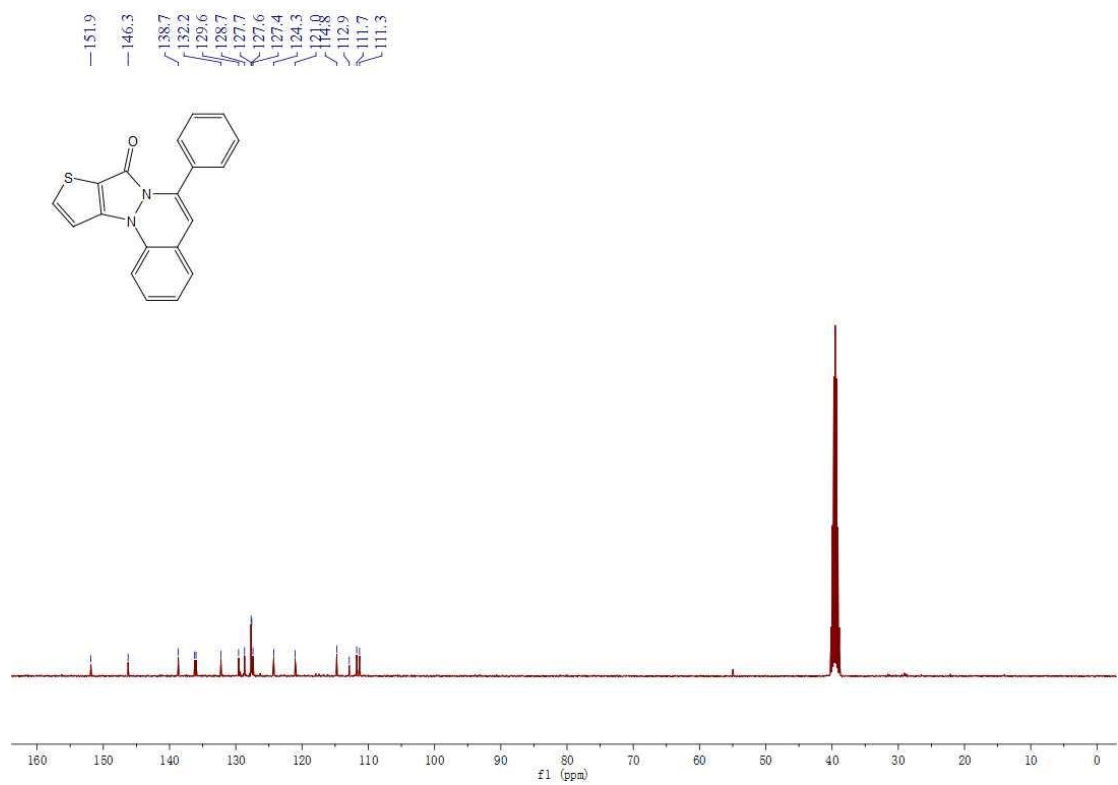



# 5a

<sup>1</sup>H NMR (400 MHz, CDCl<sub>3</sub>)

8.03, 8.01, 7.96, 7.94, 7.89, 7.87, 7.83, 7.81, 7.77, 7.75, 7.73, 7.68, 7.66, 7.64, 7.34, 7.30, 7.26, 7.17, 7.15, 7.13, 6.95

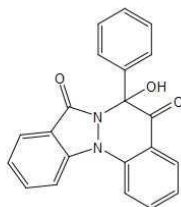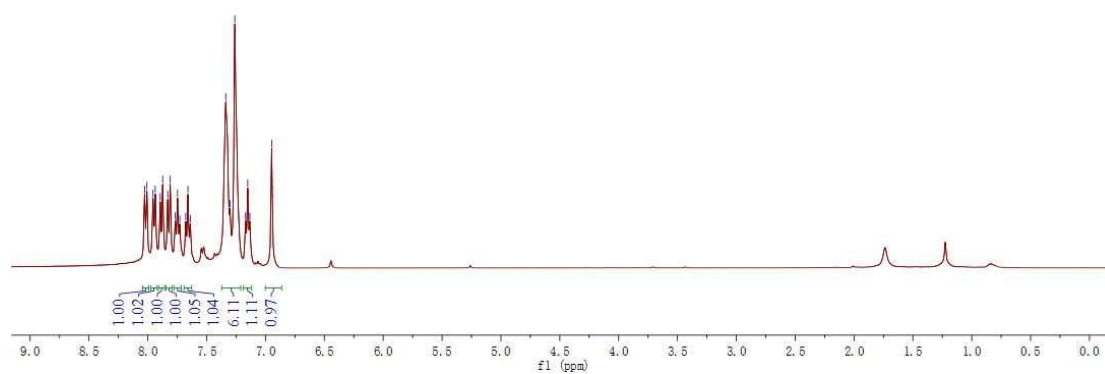

<sup>13</sup>C NMR (101 MHz, CDCl<sub>3</sub>)

185.6, 164.5, 141.1, 139.7, 138.3, 136.4, 134.3, 130.3, 129.7, 129.0, 125.7, 125.0, 123.7, 117.9, 117.3, 113.1, 112.9, 91.4

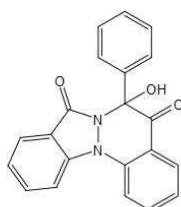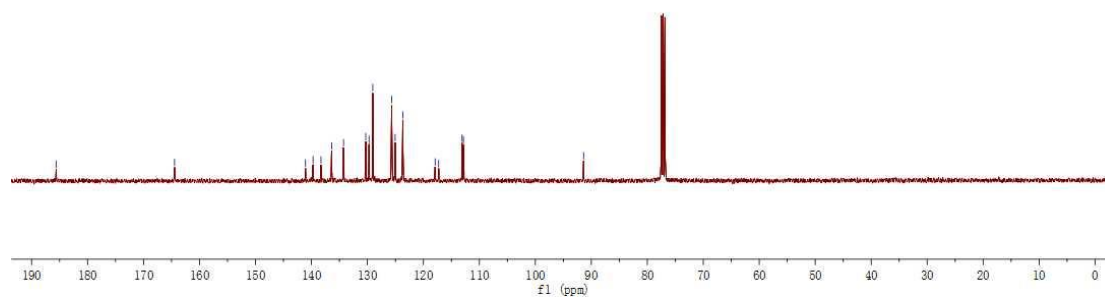

# 5b

<sup>1</sup>H NMR (400 MHz, CDCl<sub>3</sub>)

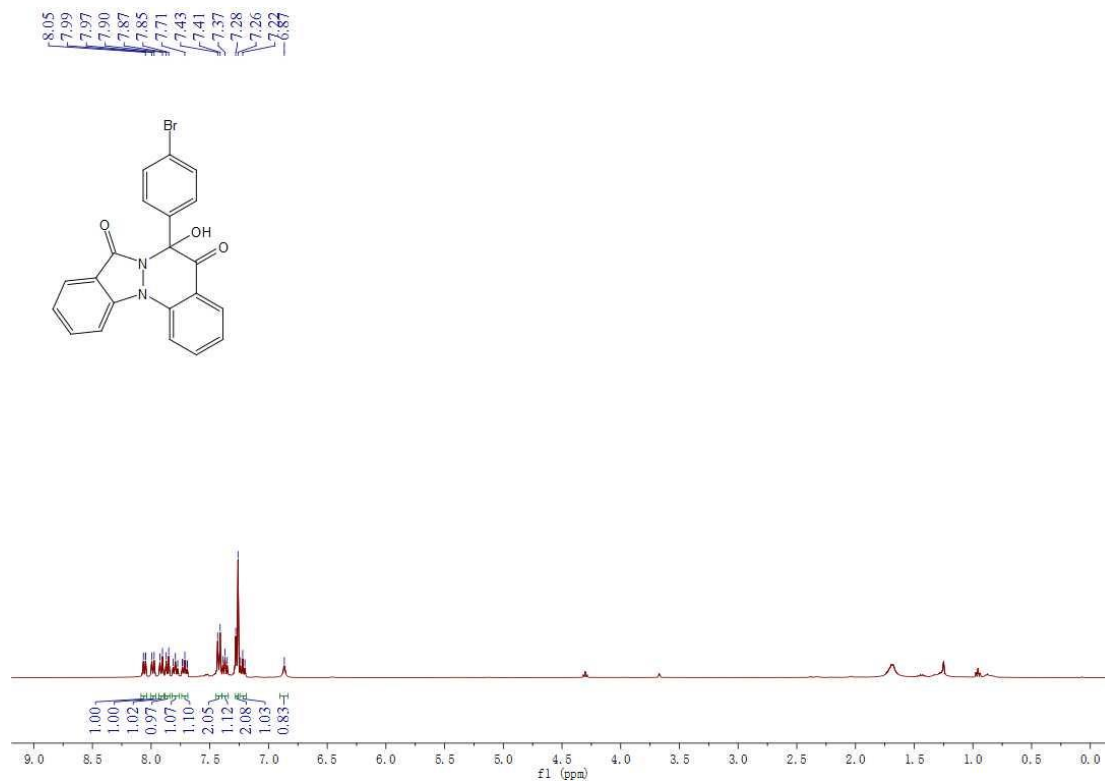

<sup>13</sup>C NMR (101 MHz, CDCl<sub>3</sub>)

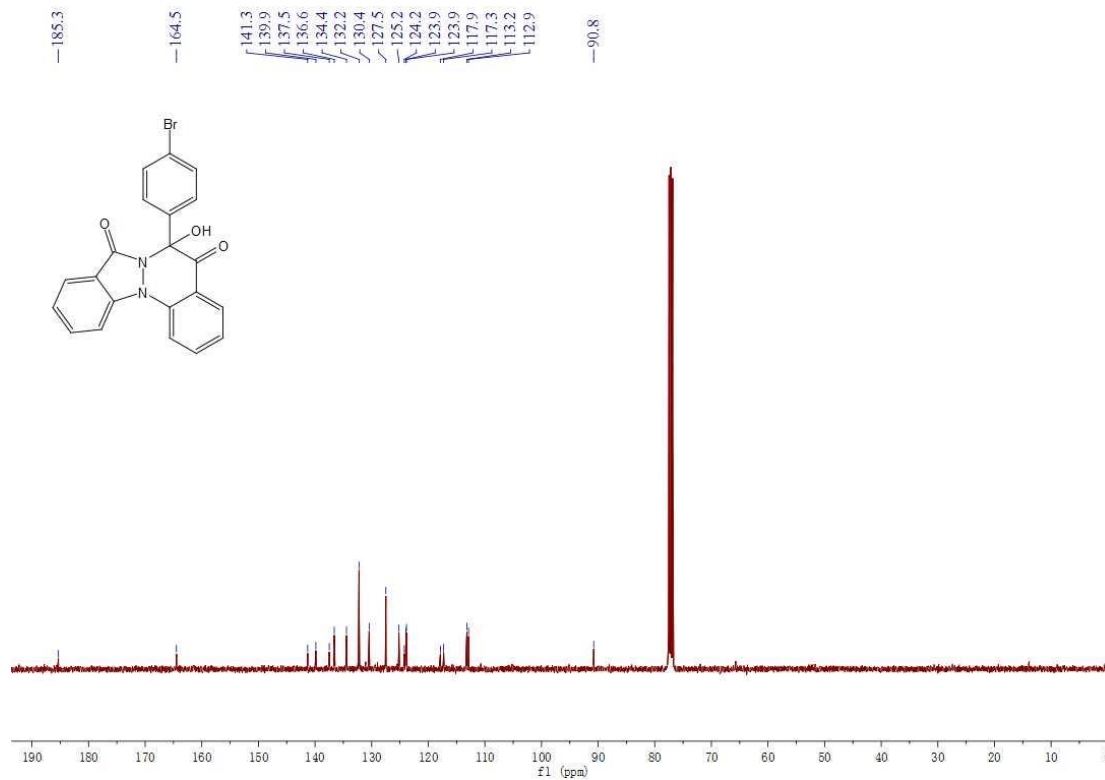

# 5c

<sup>1</sup>H NMR (400 MHz, CDCl<sub>3</sub>)

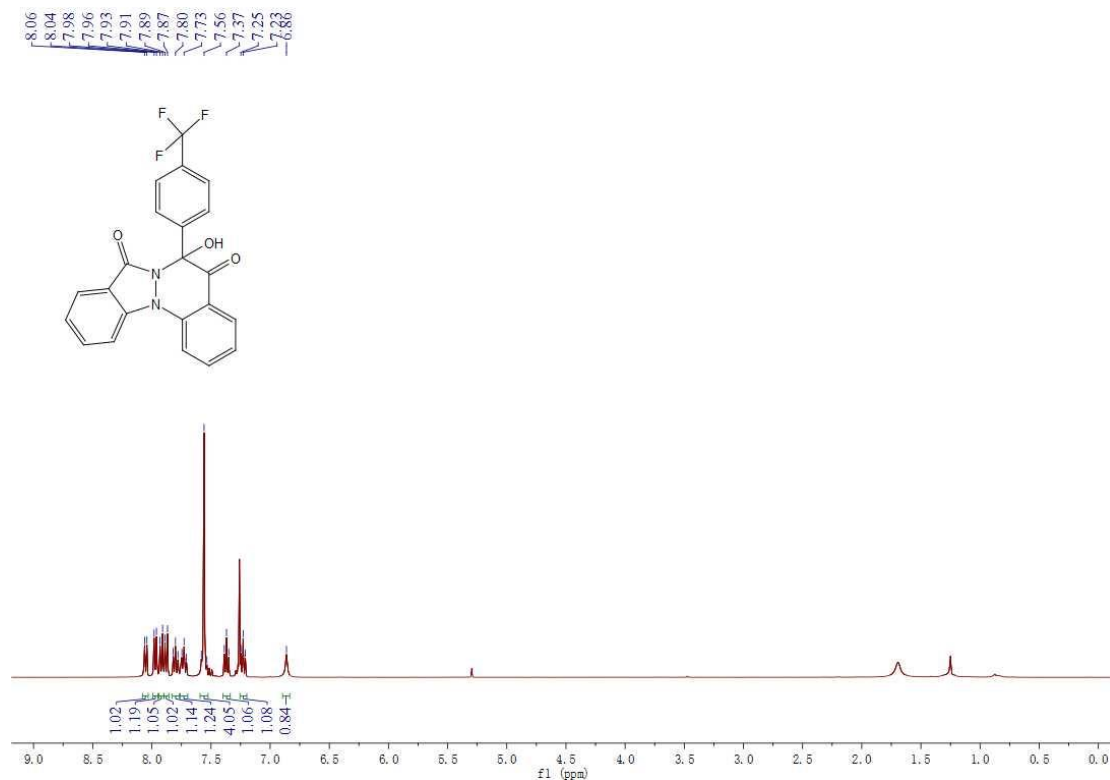

<sup>13</sup>C NMR (101 MHz, CDCl<sub>3</sub>)

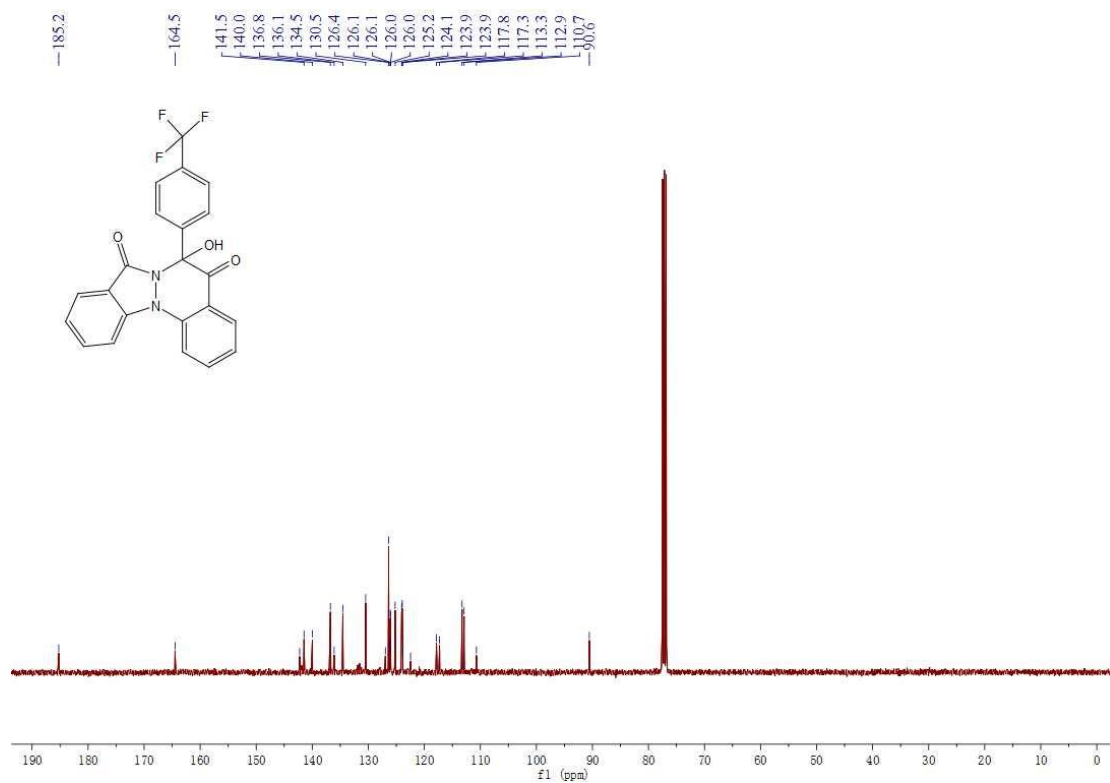

**$^{19}\text{F}$  NMR (376 MHz,  $\text{CDCl}_3$ )**

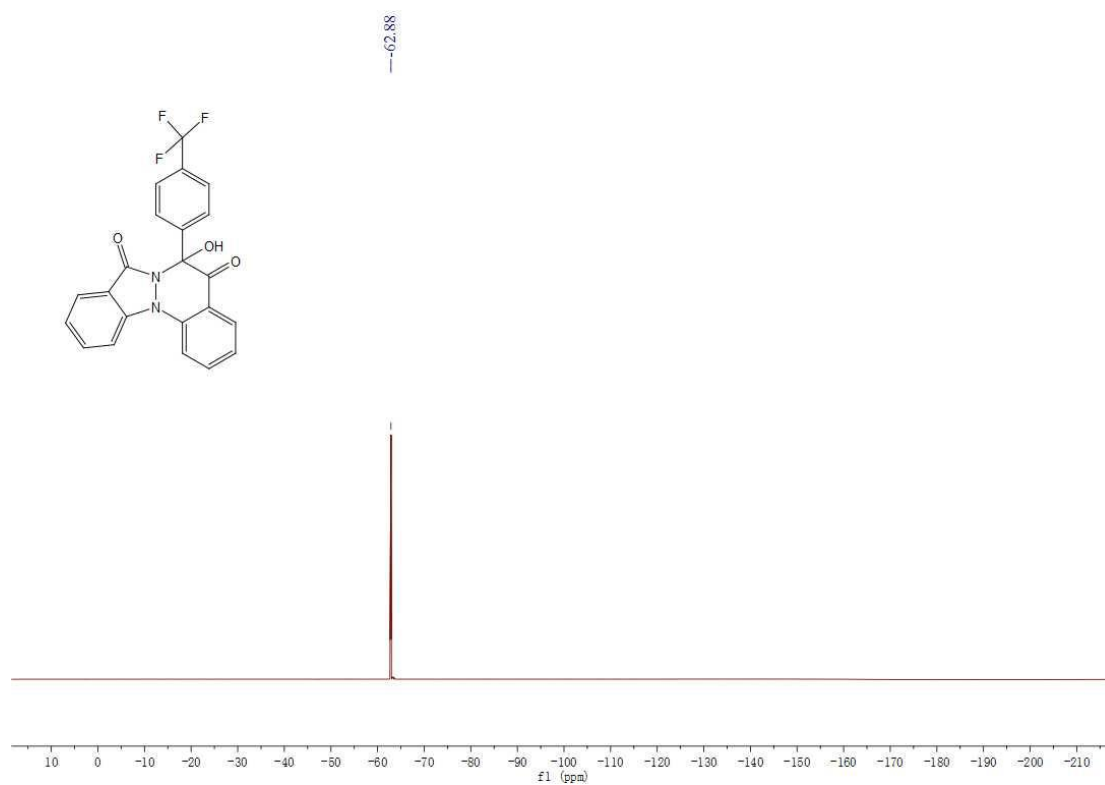

# 5d

<sup>1</sup>H NMR (400 MHz, CDCl<sub>3</sub>)

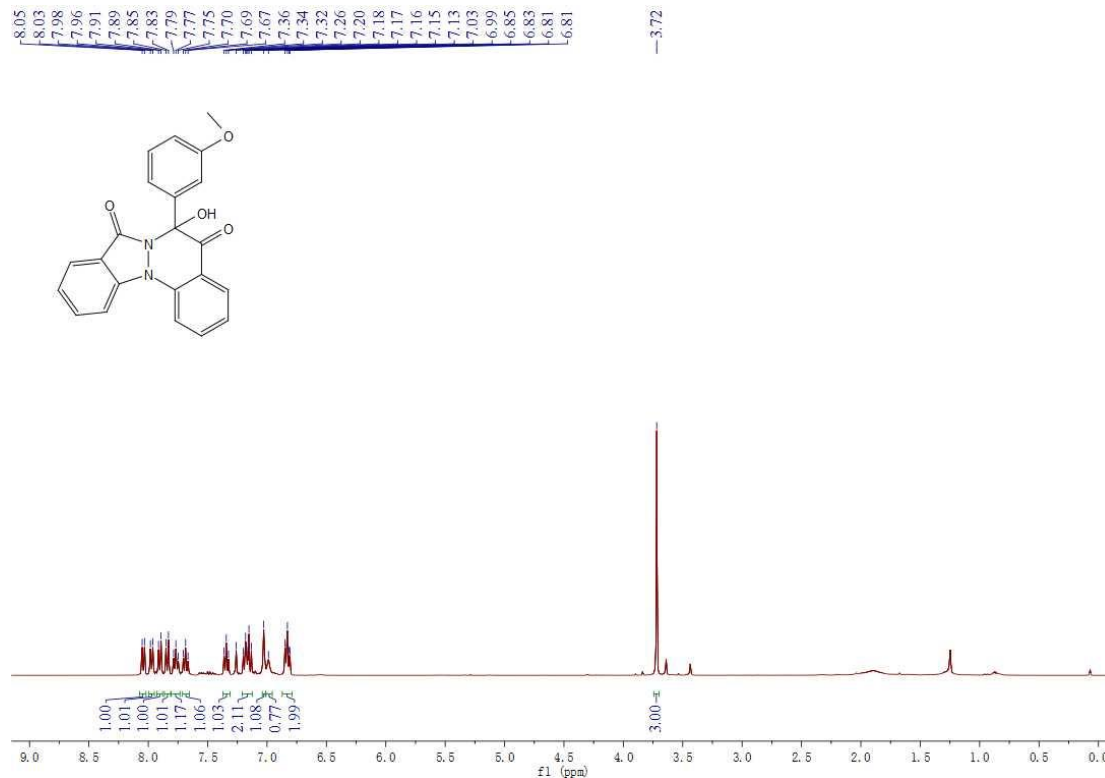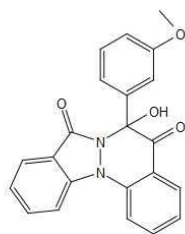

<sup>13</sup>C NMR (101 MHz, CDCl<sub>3</sub>)

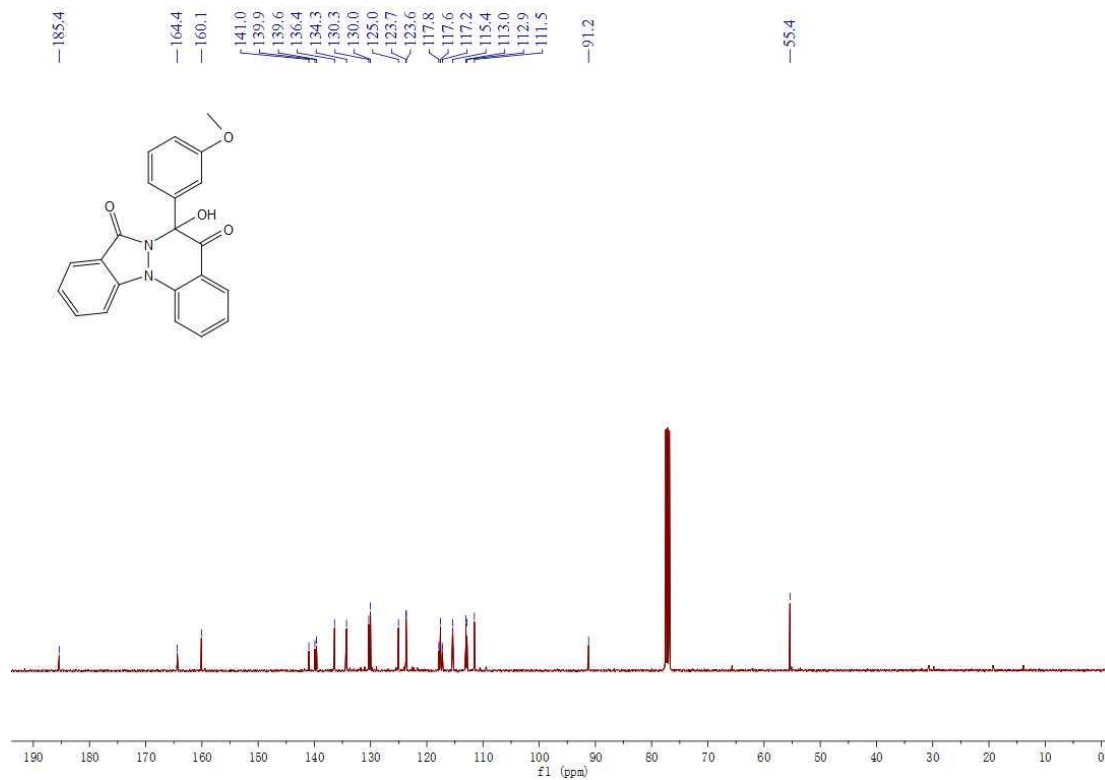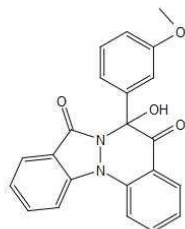

# 5e

<sup>1</sup>H NMR (400 MHz, CDCl<sub>3</sub>)

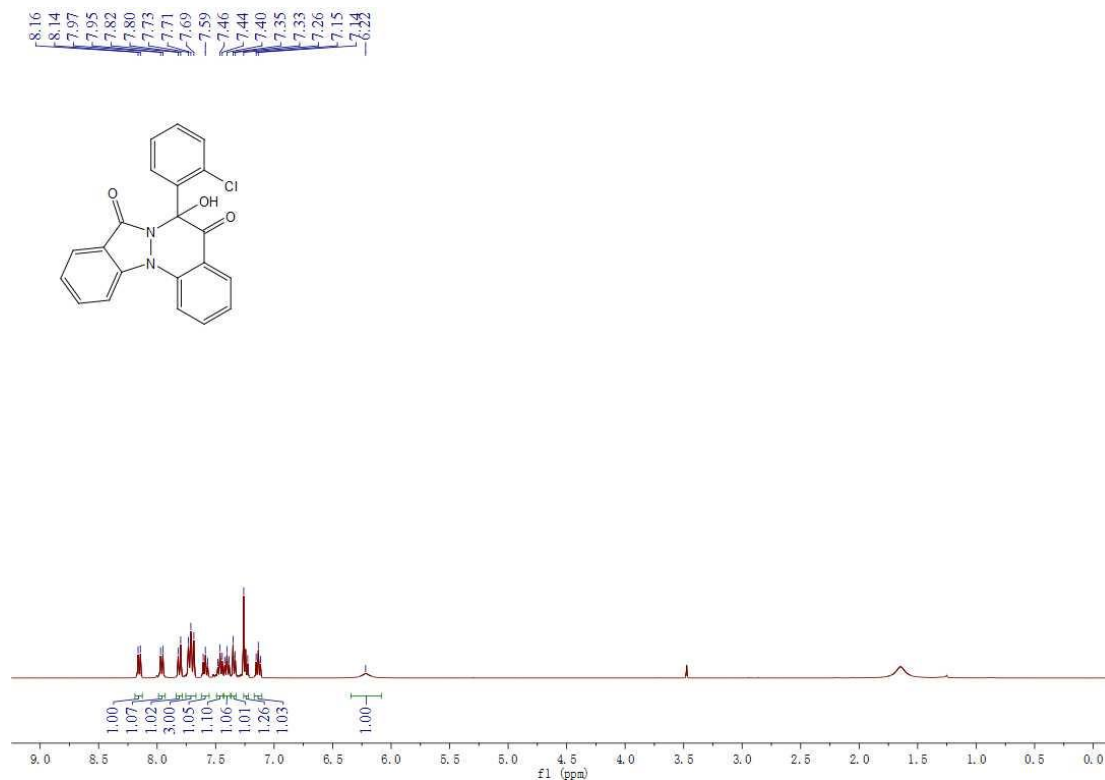

<sup>13</sup>C NMR (101 MHz, CDCl<sub>3</sub>)

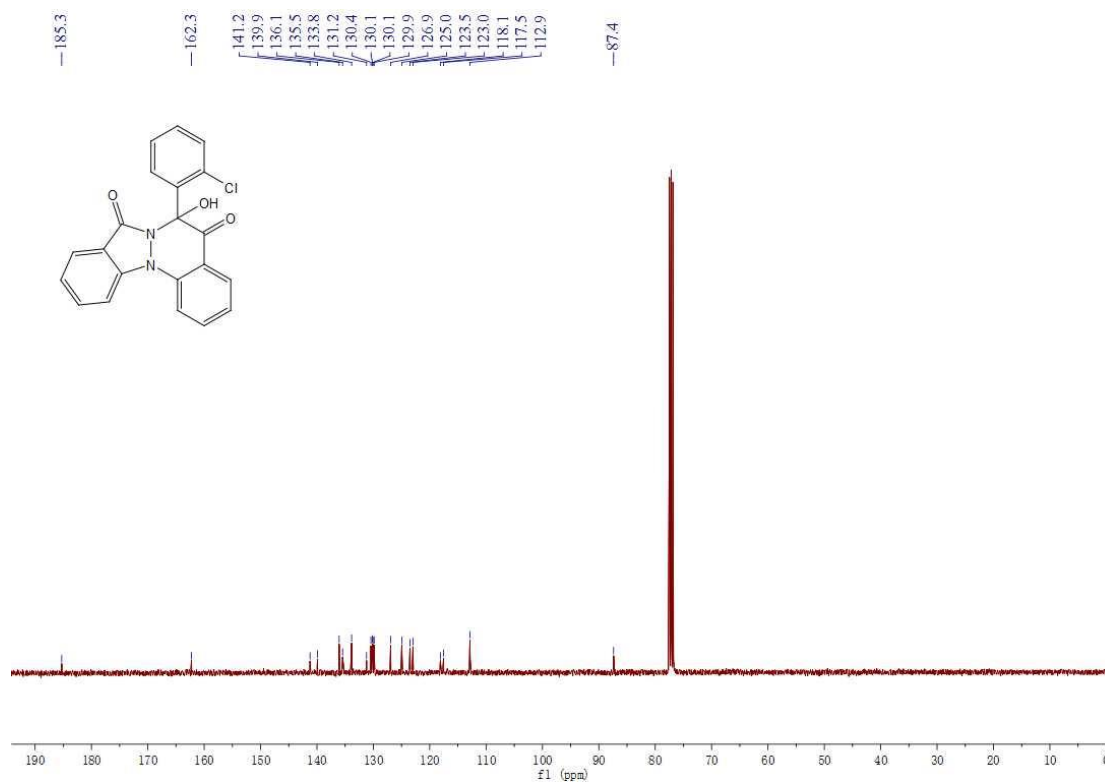

# 5f

<sup>1</sup>H NMR (400 MHz, CDCl<sub>3</sub>)

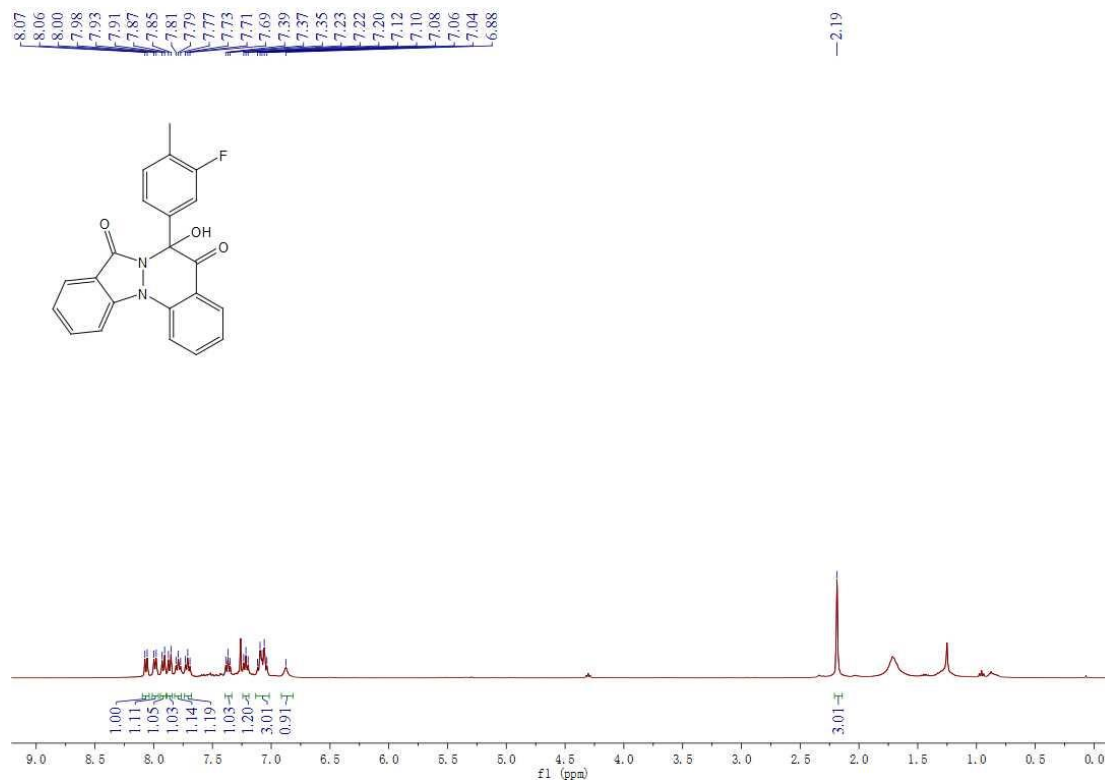

<sup>13</sup>C NMR (101 MHz, CDCl<sub>3</sub>)

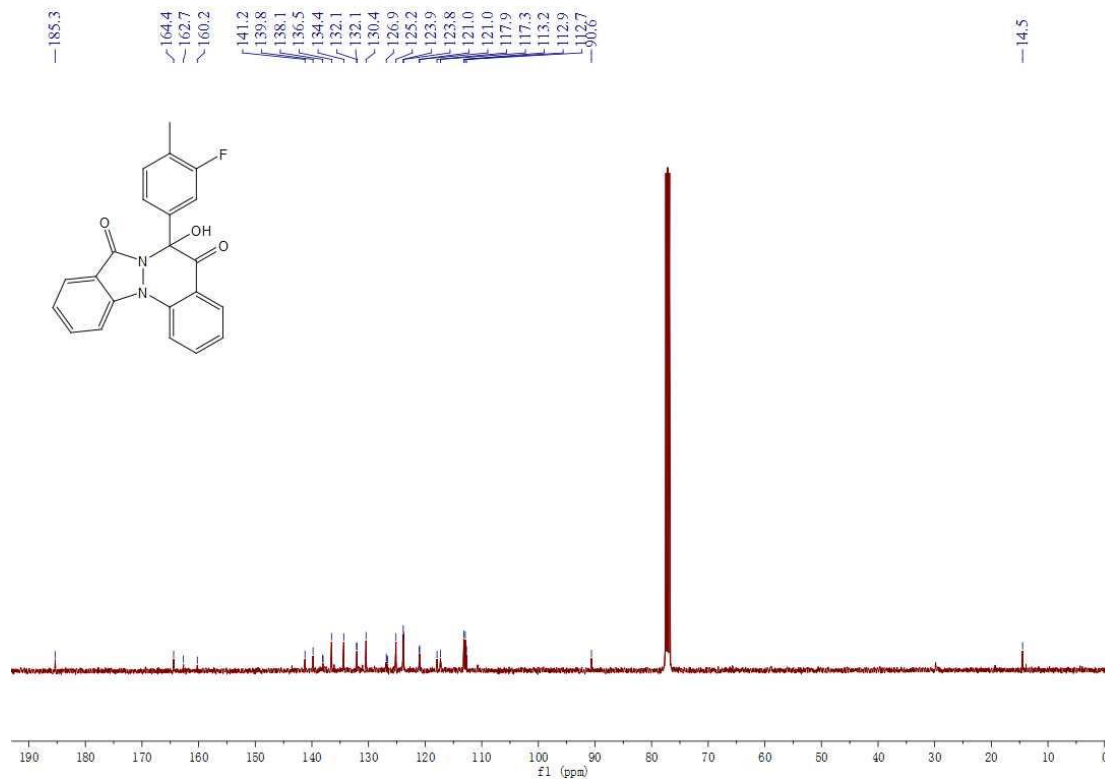

**<sup>19</sup>F NMR (376 MHz, CDCl<sub>3</sub>)**

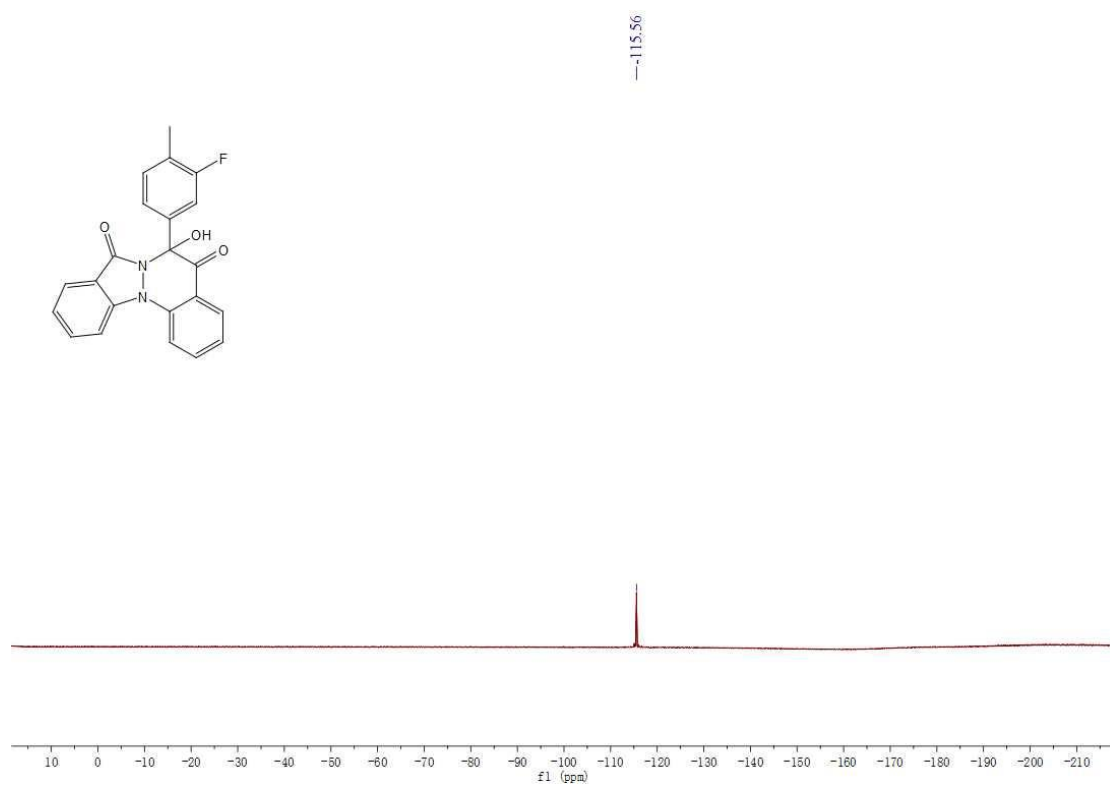



# 5g

<sup>1</sup>H NMR (400 MHz, CDCl<sub>3</sub>)

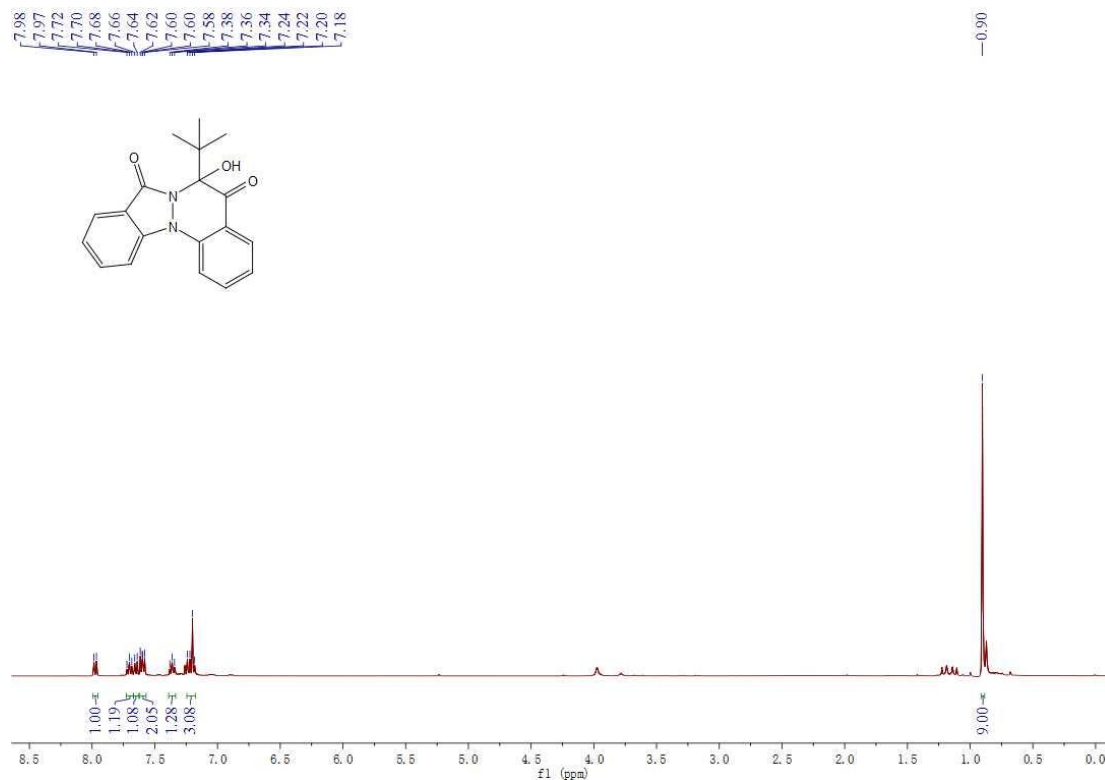

<sup>13</sup>C NMR (101 MHz, CDCl<sub>3</sub>)

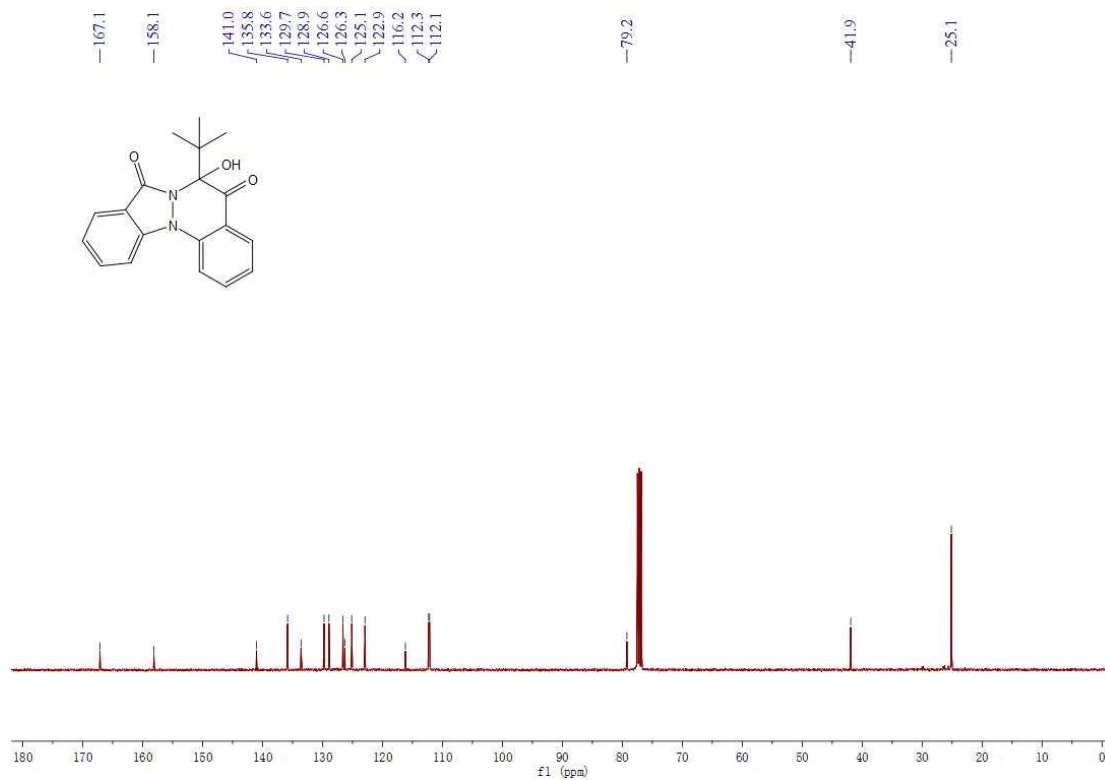

# 5h

<sup>1</sup>H NMR (400 MHz, CDCl<sub>3</sub>)

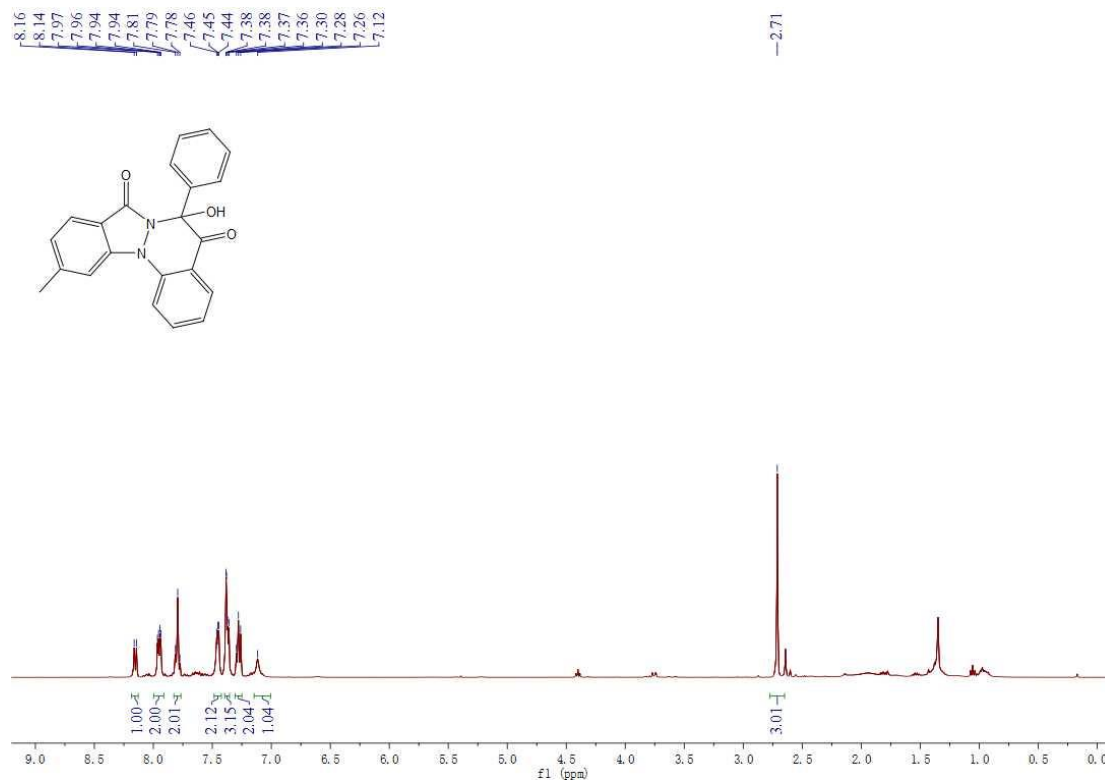

<sup>13</sup>C NMR (101 MHz, CDCl<sub>3</sub>)

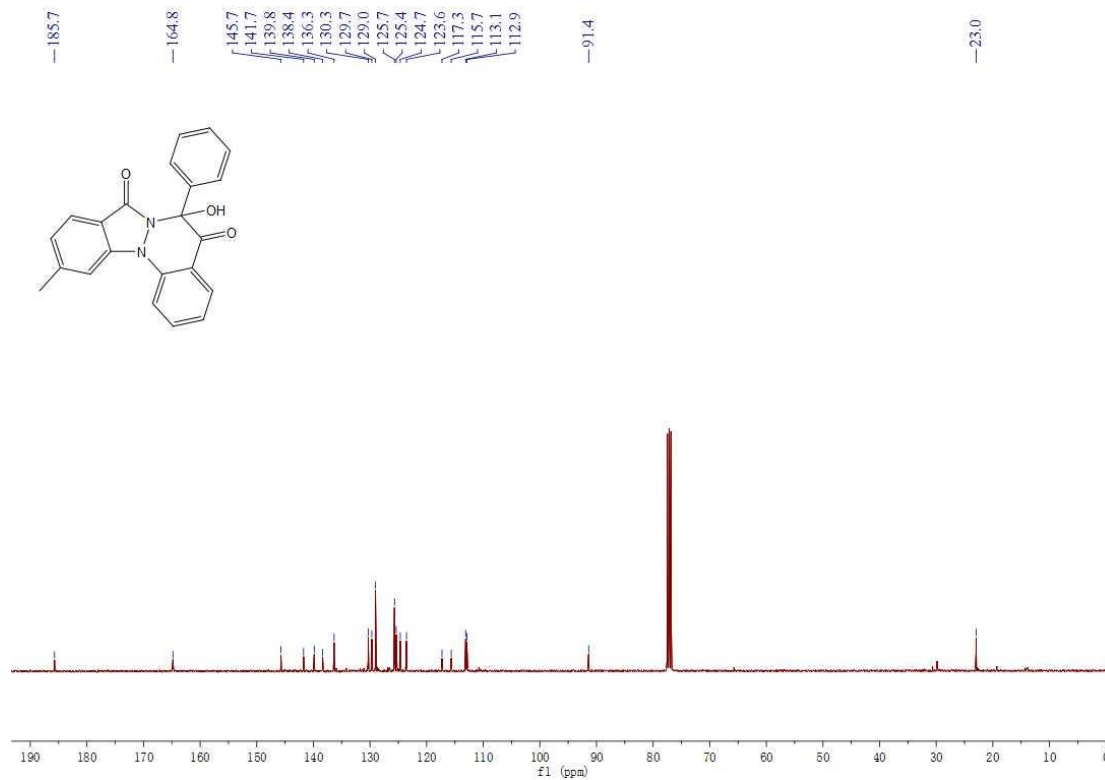

# 5i

**<sup>1</sup>H NMR (400 MHz, CDCl<sub>3</sub>)**

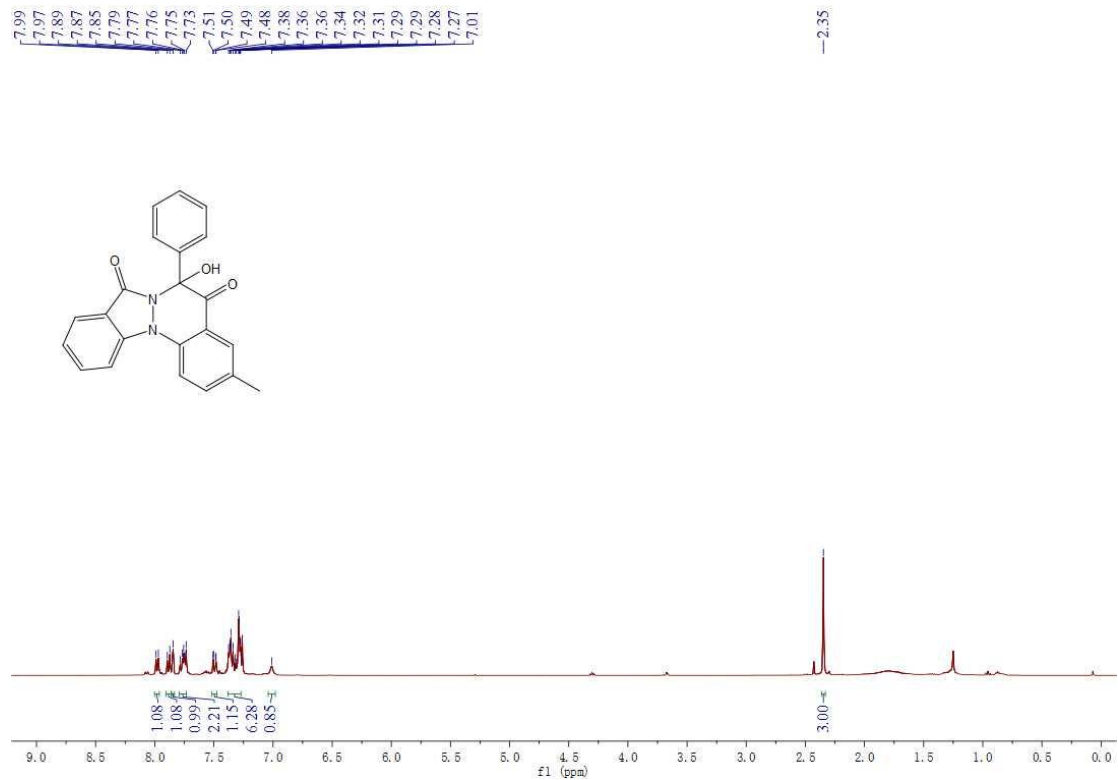

**<sup>13</sup>C NMR (101 MHz, CDCl<sub>3</sub>)**

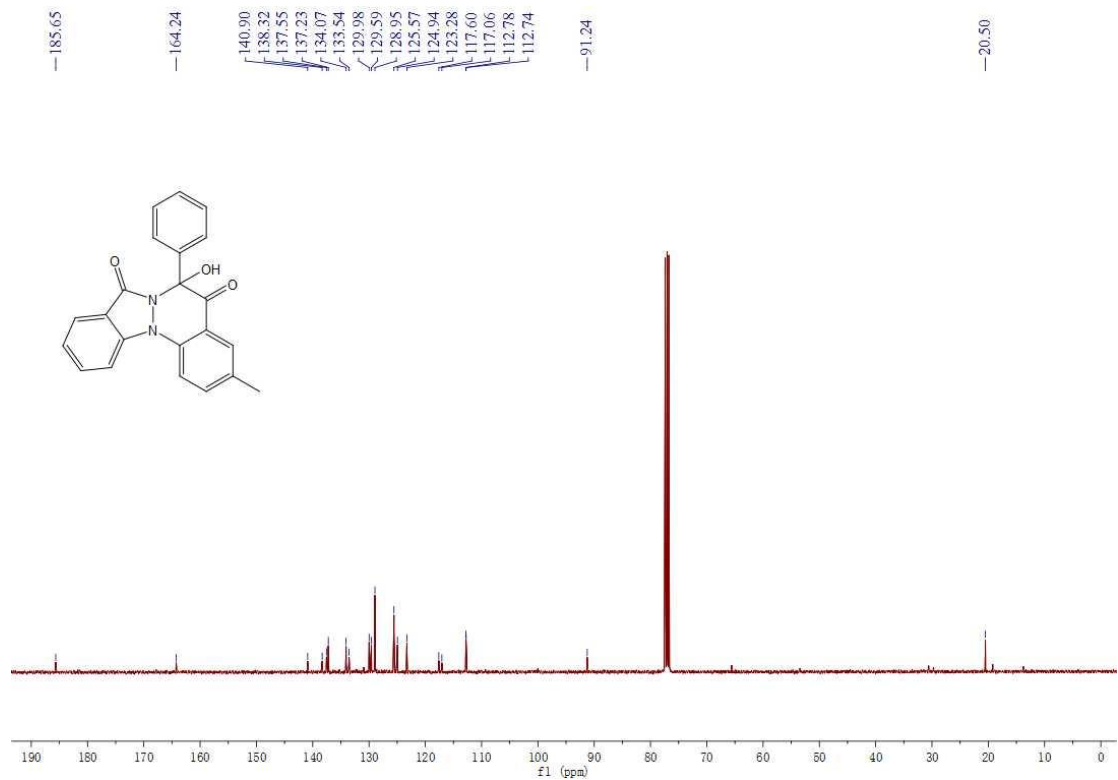

**<sup>1</sup>H NMR (400 MHz, DMSO)**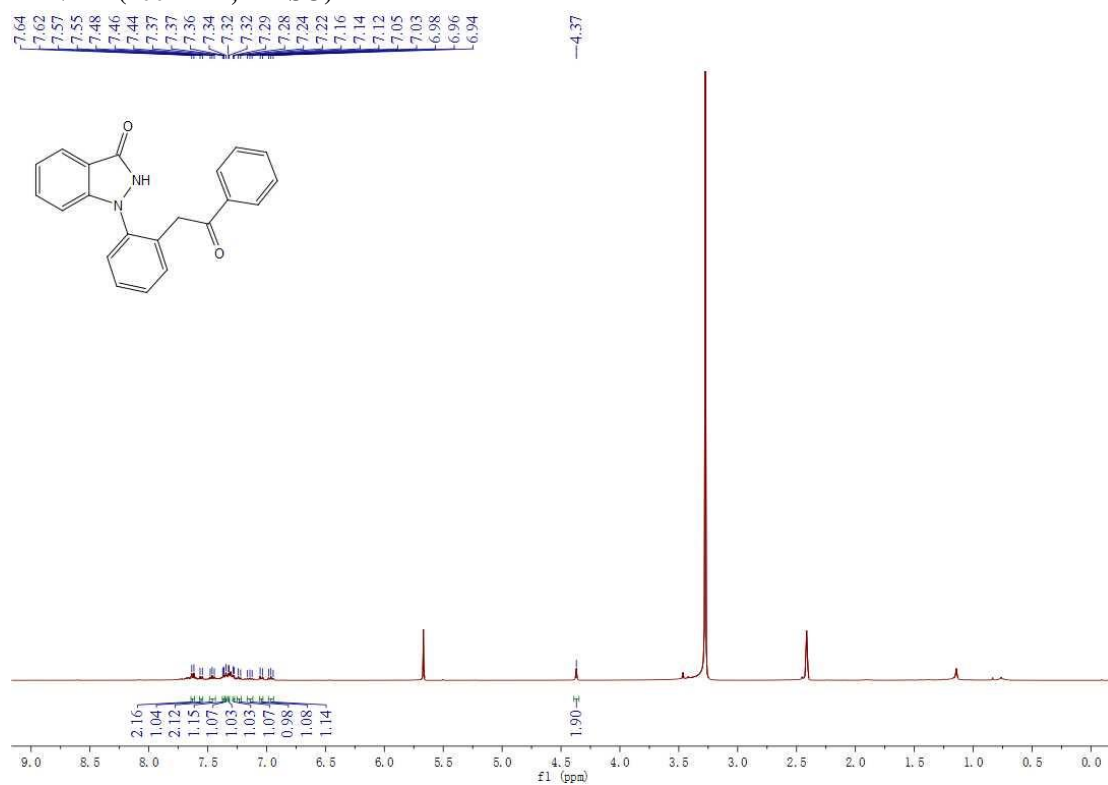**<sup>13</sup>C NMR (101 MHz, DMSO)**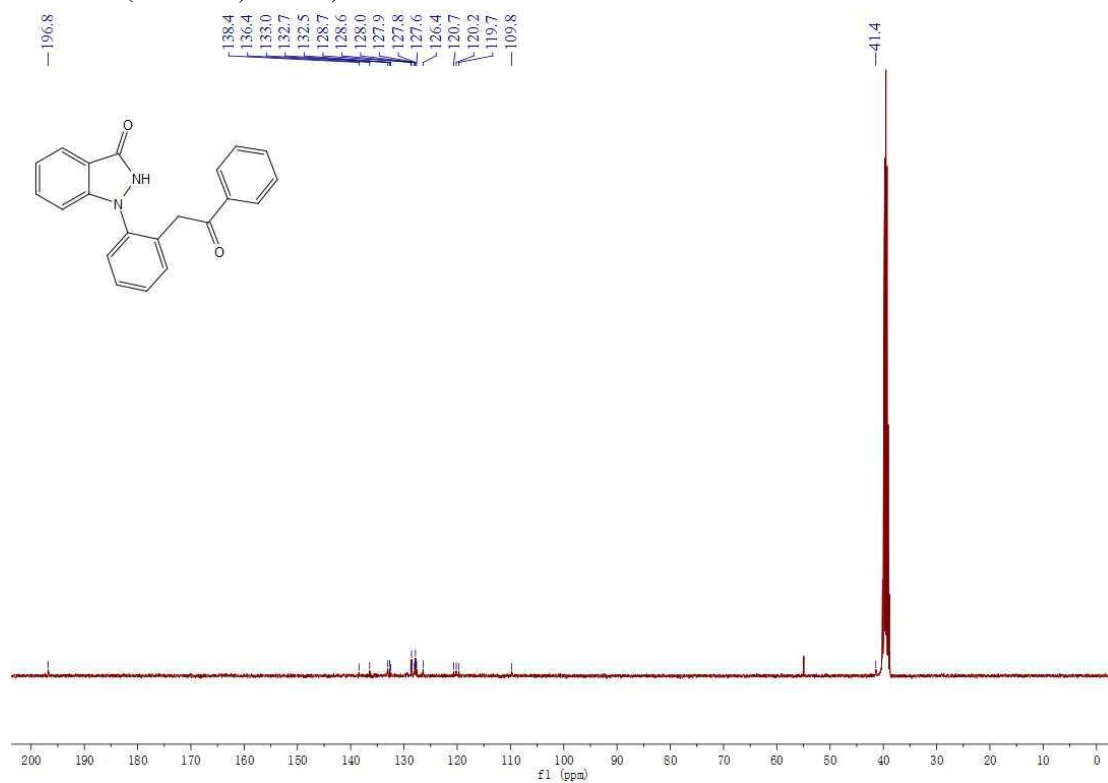

## 11. References

- [1] J. Y. Kang, W. An, S. Kim, N. Y. Kwon, T. Jeong, P. Ghosh, H. S. Kim, N. K. Mishra, I. S. Kim. *Chem. Commun.*, **2021**, 57, 10947-10950.
- [2] M. Barday, C. Janot, N. R. Halcovitch, J. Muir, C. Aïssa. *Angew. Chem. Int. Ed.*, **2017**, 56, 13117-13121.
